# Supplementary material
Source: Research Square preprint supplement (doi:10.21203/rs.3.rs-9022355/v1)
Supplement: Supplementary file 1 [file 5743ae45a67598471a258b83.xlsx]

## Sheet: Sheet1
compound ID	Annotation	HMDB ID	Calc. monoisot. mass	Detected m/z	Ion	ID Level	Log2 Fold Change: (KO) / (WT)	Adj. P-value
RP-3	L-Cystathionine	HMDB0000099	222.067	223.075	[M+H]+	4	-7.34	0.00262268
RN-8			244.049	243.042	[M-H]-	5	-4.58	0.00843633
RN-14	N-Acetylglutamine	HMDB0006029	188.08	187.072	[M-H]-	4	-2.62	0.0193174
HN-5			773.536	772.529	[M-H]-	5	-1.77	0.000223118
HP-32			144.042	145.049	[M+H]+	5	-1.56	0.0410816
HP-23			84.021	85.0283	[M+H]+	5	-1.49	0.0187558
HP-25	Acetyl-L-carnitine	HMDB0000201	203.116	204.123	[M+H]+	1	-1.41	0.0198144
HP-7	Propionylcarnitine	HMDB0000824	217.131	218.139	[M+H]+	2	-1.37	0.00347008
HP-20	L-Carnitine	HMDB0000062	161.105	162.112	[M+H]+	1	-1.26	0.0163338
HN-15			745.571	744.563	[M-H]-	5	-1.09	0.00569084
RN-18	Malic acid	HMDB0000156	134.021	133.014	[M-H]-	1	-1.05	0.0292125
HN-8	PE(20:3(5Z,8Z,11Z)/18:0)	HMDB0009321	769.562	768.555	[M-H]-	4	-1.03	0.000579471
RN-7			200.045	199.038	[M-H]-	5	-1.01	0.00843633
HN-4	PE(P-16:0/18:1(9Z))	HMDB0011342	701.536	700.529	[M-H]-	3	1.07	0.000157963
RN-17			547.289	546.282	[M-H]-	5	1.1	0.0292125
RN-11			242.019	241.012	[M-H]-	5	1.11	0.0119835
RN-9	LysoPE(0:0/18:1(11Z))	HMDB0011475	479.301	478.294	[M-H]-	3	1.14	0.0108081
HP-18	Cytidine	HMDB0000089	243.086	266.075	[M+Na]+	3	1.17	0.0139348
HP-17	L-Agaridoxin	HMDB0029445	254.09	255.097	[M+H]+	4	1.24	0.0129719
HN-22	Uridine	HMDB0000296	244.069	243.062	[M-H]-	1	1.29	0.0305167
HP-21	trans-Hexadec-2-enoyl carnitine	HMDB0006317	397.319	398.326	[M+H]+	4	1.38	0.0165629
HP-31	Glycerophosphocholine	HMDB0000086	257.103	258.11	[M+H]+	2	1.55	0.0381338
HP-10	1-Methyladenosine	HMDB0003331	281.112	282.12	[M+H]+	1	1.55	0.00347462
HP-9	1-Palmitoylphosphatidylcholine	HMDB0256091	495.332	496.339	[M+H]+	3	1.56	0.00347462
HP-11	LysoPC(14:0/0:0)	HMDB0010379	467.301	468.308	[M+H]+	3	1.57	0.003617
HP-33			305.073	306.081	[M+H]+	5	1.6	0.0412271
HN-21			243.087	302.101	[M-H+HAc]-	5	1.69	0.0246345
HP-15	LysoPC(18:0/0:0)	HMDB0010384	523.363	524.371	[M+H]+	3	1.71	0.00517222
RN-13	Guanosine	HMDB0000133	283.092	282.084	[M-H]-	1	1.75	0.0130309
RN-16	Succinyladenosine	HMDB0000912	383.108	382.101	[M-H]-	4	1.77	0.0286525
RP-4			230.128	502.29	[2M+ACN+H]+	5	1.95	0.00278039
HN-16	Palmitoleic acid	HMDB0003229	254.225	253.217	[M-H]-	4	1.96	0.00640014
HP-14	Palmitoylcarnitine	HMDB0000222	399.335	400.342	[M+H]+	1	1.97	0.00517222
HN-14	Thymidine	HMDB0000273	242.09	241.083	[M-H]-	1	2.01	0.00389125
HP-5	LysoPC(18:1(11Z)/0:0)	HMDB0010385	521.348	522.355	[M+H]+	3	2.01	0.0023899
HP-29	Sphinganine	HMDB0000269	301.298	302.305	[M+H]+	4	2.02	0.036723
HN-17			567.354	566.346	[M-H]-	5	2.06	0.00759267
HP-36			610.554	611.561	[M+H]+	5	2.2	0.0433939
HP-6	LysoPE(P-16:0/0:0)	HMDB0011152	437.29	438.297	[M+H]+	4	2.32	0.00309154
HN-11	Palmitic acid	HMDB0000220	256.24	255.233	[M-H]-	4	2.37	0.00210615
HP-26	Niacinamide	HMDB0001406	122.048	123.055	[M+H]+	1	2.41	0.029679
HP-19			451.366	452.373	[M+H]+	5	2.57	0.0163338
RP-7	Sphingosine	HMDB0000252	299.282	300.29	[M+H]+	4	2.59	0.0272115
HN-6			465.322	464.315	[M-H]-	5	2.78	0.000391528
RN-5			262.08	261.073	[M-H]-	5	2.91	0.00413316
HP-3	Oleoylcarnitine	HMDB0005065	425.35	426.357	[M+H]+	1	3.11	0.00133261
HP-8	Cytosine	HMDB0000630	111.043	112.05	[M+H]+	2	3.34	0.00347462
HN-7	Oleic acid	HMDB0000207	282.256	281.248	[M-H]-	2	3.35	0.000402861
HP-4			631.626	632.634	[M+H]+	5	3.39	0.0023899
HP-27			456.322	457.329	[M+H]+	5	3.5	0.0315002
HN-3	Deoxyinosine	HMDB0000071	252.086	251.078	[M-H]-	4	3.73	0.000127177
HN-2	Pantothenic acid	HMDB0000210	219.11	218.103	[M-H]-	1	3.81	8.74928e-05
HN-13	Stearic acid	HMDB0000827	284.271	283.264	[M-H]-	4	4.05	0.00268819
RP-5	Stearoylcarnitine	HMDB0000848	427.366	428.373	[M+H]+	4	4.1	0.00372073
RN-4	Pyrogallol-2-O-glucuronide	HMDB0060017	302.064	301.057	[M-H]-	4	4.11	0.00227324
HN-1			304.088	303.081	[M-H]-	5	4.34	1.44768e-05
HN-9	gamma-Glutamylisoleucine	HMDB0011170	260.137	259.13	[M-H]-	4	4.68	0.00119346
HP-24			418.366	419.373	[M+H]+	5	4.92	0.0198144
RN-3	5,6-Dihydrouridine	HMDB0000497	246.085	245.078	[M-H]-	4	5.15	0.00227324
RN-2	gamma-Glutamylglutamic acid	HMDB0011737	276.096	275.089	[M-H]-	4	5.48	0.00201241
