# Supplementary material
Source: Research Square preprint supplement (doi:10.21203/rs.3.rs-9022355/v1)
Supplement: Supplementary file 2 [file cc27baeb5949128b78f63585.xlsx]

## Sheet: DEG FOXO cKO vs WT aNSPCs
GeneID	Base mean	log2(FC)	SEM	Wald-Stats	p-Value	p-Value adjust	chr	Start	End	Strand	V12
ENSMUSG00000018340.14	9899.09	-4.8345	0.113184	-42.7138	1e-300	1e-300	chr11	54869933	54924271	-	NA
ENSMUSG00000029826.15	1393.51	-5.75801	0.14338	-40.159	1e-300	1e-300	chr6	38282220	38331538	-	NA
ENSMUSG00000020538.16	7351.12	-7.15293	0.10276	-69.6082	1e-300	1e-300	chr11	60089914	60113407	-	NA
ENSMUSG00000086503.5	2278.48	-8.44115	0.217993	-38.7222	1e-300	1e-300	chrX	102503971	102526860	-	NA
ENSMUSG00000031561.17	1321.87	-8.2174	0.22771	-36.0872	3.60442e-285	1.02201e-281	chr8	48680716	49296986	-	NA
ENSMUSG00000039263.17	1428.9	-4.93084	0.142322	-34.6456	5.19671e-263	1.32615e-259	chr2	173952141	173964863	+	NA
ENSMUSG00000021373.17	907.203	-7.58556	0.220276	-34.4367	7.12659e-260	1.6533e-256	chr13	46655323	46803757	+	NA
ENSMUSG00000033658.17	1242.29	-8.42051	0.259359	-32.4667	3.15052e-231	6.69985e-228	chr8	111729819	111758383	-	NA
ENSMUSG00000022438.7	1164.34	-7.76489	0.241726	-32.1227	2.12608e-226	4.17349e-223	chr15	84116243	84199889	+	NA
ENSMUSG00000026421.15	3204.09	-3.65731	0.11417	-32.0339	3.67632e-225	6.70114e-222	chr1	135647798	135679970	+	NA
ENSMUSG00000001082.13	545.055	-5.08988	0.160021	-31.8076	5.08889e-222	8.65756e-219	chr5	34790985	34794556	-	NA
ENSMUSG00000062611.5	3735.62	5.92076	0.107805	54.9208	1e-300	1e-300	chr14	88360452	88361244	-	NA
ENSMUSG00000085882.3	666.188	4.80236	0.126743	37.8906	1e-300	1e-300	chr11	59087690	59093263	-	NA
ENSMUSG00000059751.8	3886.16	4.7365	0.0938015	50.495	1e-300	1e-300	chr13	108807136	108807931	+	NA
ENSMUSG00000029781.8	3166.12	4.63122	0.106433	43.5131	1e-300	1e-300	chr6	56809043	56856343	+	NA
ENSMUSG00000031673.7	434.801	-4.42861	0.145543	-30.4282	2.33038e-203	3.7168e-200	chr8	103358726	103512274	-	NA
ENSMUSG00000066705.8	719.586	-5.97374	0.199159	-29.9948	1.14782e-197	1.72301e-194	chr9	45281482	45307457	+	NA
ENSMUSG00000028173.11	2994.85	3.25842	0.11361	28.6808	6.62369e-181	9.39056e-178	chr3	159545308	159644300	+	NA
ENSMUSG00000022122.16	2132.33	-5.86177	0.205078	-28.5831	1.08984e-179	1.46377e-176	chr14	104052060	104081838	-	NA
ENSMUSG00000100801.2	6060.22	-2.99898	0.106193	-28.2409	1.84046e-175	2.34834e-172	chr5	5831614	5833555	-	NA
ENSMUSG00000049551.3	1043.97	-7.8464	0.282633	-27.7618	1.256e-169	1.52627e-166	chr5	135277791	135280084	-	NA
ENSMUSG00000001986.17	592.06	-7.14233	0.259011	-27.5754	2.19781e-167	2.54936e-164	chrX	40489730	40767478	+	NA
ENSMUSG00000058297.17	918.784	-7.24288	0.267216	-27.105	8.60034e-162	9.54226e-159	chr10	59942040	59971020	+	NA
ENSMUSG00000085666.4	791.905	3.44975	0.128415	26.8642	5.76059e-159	6.12519e-156	chr10	41930108	41931302	-	NA
ENSMUSG00000084349.4	6557.41	-2.89159	0.109253	-26.4668	2.33736e-154	2.38588e-151	chrX	13068809	13070019	+	NA
ENSMUSG00000030272.16	469.347	-3.95619	0.15176	-26.0686	8.27443e-150	8.12136e-147	chr6	113311084	113320945	-	NA
ENSMUSG00000001663.11	419.554	-3.99168	0.153689	-25.9725	1.01212e-148	9.56602e-146	chr10	75619646	75634418	-	NA
ENSMUSG00000032766.10	457.072	-7.39026	0.285184	-25.914	4.62972e-148	4.21949e-145	chr6	4003903	4008445	+	NA
ENSMUSG00000039194.17	1468.76	-3.72498	0.146041	-25.5063	1.67702e-143	1.47572e-140	chr7	79024617	79036796	-	NA
ENSMUSG00000034674.19	3625.43	-2.29898	0.0912193	-25.2028	3.73336e-140	3.17572e-137	chr10	82465661	82486633	+	NA
ENSMUSG00000105703.3	723.743	-7.63555	0.304095	-25.1091	3.95387e-139	3.2548e-136	chr14	54529899	54534913	-	NA
ENSMUSG00000021895.11	264.957	-4.44625	0.177921	-24.9901	7.8402e-138	6.25231e-135	chr14	26836855	27125868	+	NA
ENSMUSG00000029545.14	327.716	-6.0224	0.241072	-24.9817	9.66184e-138	7.47153e-135	chr5	115248357	115257405	-	NA
ENSMUSG00000036699.13	458.563	-7.44167	0.299375	-24.8573	2.15578e-136	1.61804e-133	chrX	35459556	35462811	+	NA
ENSMUSG00000032368.15	1636.15	-2.2627	0.092117	-24.5633	3.11879e-133	2.27395e-130	chr9	91240110	91247863	-	NA
ENSMUSG00000082908.5	1068.15	2.25367	0.0917919	24.5519	4.12492e-133	2.924e-130	chr2	87356488	87356741	+	NA
ENSMUSG00000036928.15	1352.68	3.40789	0.13918	24.4855	2.11042e-132	1.45556e-129	chr5	138278501	138310655	+	NA
ENSMUSG00000041633.15	229.02	-5.82279	0.237918	-24.474	2.79739e-132	1.8786e-129	chrX	152468149	152479387	-	NA
ENSMUSG00000069170.15	617.511	-5.61241	0.230977	-24.2985	2.03231e-130	1.32981e-127	chr13	81243186	81781273	-	NA
ENSMUSG00000020814.14	342.394	-5.39572	0.223526	-24.1391	9.71686e-129	6.19912e-126	chr11	116693887	116718872	-	NA
ENSMUSG00000035245.13	271.922	-3.14502	0.130908	-24.0246	1.53805e-127	9.57305e-125	chr6	97086984	97126143	-	NA
ENSMUSG00000034285.16	997.818	2.83173	0.118407	23.9152	2.1271e-126	1.29241e-123	chr11	4823950	4844200	+	NA
ENSMUSG00000060703.13	183.489	-4.70318	0.197754	-23.783	5.01383e-125	2.97554e-122	chr2	60082336	60114832	-	NA
ENSMUSG00000107092.2	317.319	3.91557	0.166405	23.5303	1.99736e-122	1.15842e-119	chr5	96122098	96123482	+	NA
ENSMUSG00000094497.2	323.8	6.41232	0.275927	23.2392	1.82853e-119	1.02243e-116	chr1	43228315	43228798	+	NA
ENSMUSG00000036986.17	440.977	4.22481	0.181799	23.2389	1.84302e-119	1.02243e-116	chr9	58125358	58157069	-	NA
ENSMUSG00000027559.6	721.044	-5.66408	0.244616	-23.155	1.29486e-118	7.03056e-116	chr3	14928571	14937583	+	NA
ENSMUSG00000070436.13	1992.03	-6.34631	0.276051	-22.9896	5.92333e-117	3.14912e-114	chr7	98994582	99002446	-	NA
ENSMUSG00000048330.15	447.028	-4.18596	0.182428	-22.9458	1.62205e-116	8.44759e-114	chr7	108633518	108682538	-	NA
ENSMUSG00000000942.11	187.652	-5.33872	0.233207	-22.8927	5.49773e-116	2.80593e-113	chr6	52166650	52168733	-	NA
ENSMUSG00000019846.12	537.82	-8.44676	0.369764	-22.8437	1.68856e-115	8.44908e-113	chr10	38841510	38986184	+	NA
ENSMUSG00000020431.6	732.368	-2.30095	0.100743	-22.8399	1.84339e-115	9.04643e-113	chr11	7013488	7128506	+	NA
ENSMUSG00000058626.17	200.514	5.22944	0.230713	22.6664	9.61239e-114	4.62828e-111	chr17	45941129	45970251	-	NA
ENSMUSG00000047242.15	246.443	-6.11289	0.270206	-22.623	2.57157e-113	1.21526e-110	chrX	105250488	105264764	-	NA
ENSMUSG00000020695.15	443.592	-4.89502	0.216663	-22.5928	5.10003e-113	2.36632e-110	chr11	105183468	105241965	+	NA
ENSMUSG00000014776.8	395.137	-4.26141	0.18973	-22.4604	1.01282e-111	4.61538e-109	chr8	106002771	106008571	+	NA
ENSMUSG00000027204.14	1181.02	-3.71506	0.165642	-22.4282	2.08827e-111	9.34924e-109	chr2	125142513	125349913	-	NA
ENSMUSG00000025597.14	335.313	-6.56312	0.293656	-22.3497	1.21648e-110	5.3523e-108	chrX	113384029	113470526	+	NA
ENSMUSG00000059552.14	4690.2	-2.27158	0.102079	-22.2531	1.05173e-109	4.54902e-107	chr11	69471184	69482699	+	NA
ENSMUSG00000028804.21	391.484	-6.27789	0.28243	-22.2281	1.83576e-109	7.80778e-107	chr4	127881649	128461449	+	NA
ENSMUSG00000032763.12	214.482	-3.65766	0.16499	-22.169	6.84443e-109	2.86333e-106	chr10	78410179	78420336	+	NA
ENSMUSG00000070407.6	312.221	-4.02653	0.182492	-22.0641	6.99462e-108	2.87896e-105	chr11	63776617	63813116	-	NA
ENSMUSG00000046186.9	842.526	-5.68981	0.260737	-21.8221	1.43265e-105	5.80314e-103	chr9	78522827	78623535	+	NA
ENSMUSG00000079575.4	287.343	3.84901	0.17641	21.8185	1.5483e-105	6.1736e-103	chr6	46506287	46507728	-	NA
ENSMUSG00000029814.11	353.83	-2.86857	0.132094	-21.716	1.44745e-104	5.6827e-102	chr6	49062156	49191891	-	NA
ENSMUSG00000022607.19	4619.4	-1.28945	0.0594261	-21.6983	2.12845e-104	8.22967e-102	chr15	73076950	73295129	-	NA
ENSMUSG00000041577.6	1639.53	3.76871	0.173901	21.6716	3.80136e-104	1.44787e-101	chr1	133838041	133849152	-	NA
ENSMUSG00000029581.15	7123.41	4.49085	0.207888	21.6022	1.71201e-103	6.42482e-101	chr5	142946097	142958940	+	NA
ENSMUSG00000110631.2	5268.13	2.09509	0.0971776	21.5594	4.3226e-103	1.59867e-100	chr8	122559985	122567917	+	NA
ENSMUSG00000003617.17	1999.42	2.17869	0.101567	21.4508	4.48519e-102	1.63511e-99	chr3	20011217	20063309	+	NA
ENSMUSG00000031387.15	932.073	3.07469	0.144197	21.3228	6.97901e-101	2.50841e-98	chrX	72965726	72974456	-	NA
ENSMUSG00000034449.8	171.323	-3.86975	0.183626	-21.074	1.37739e-98	4.88188e-96	chr11	84711681	84719820	-	NA
ENSMUSG00000034656.19	340.563	-3.39122	0.161438	-21.0064	5.73785e-98	2.00581e-95	chr8	85065267	85366875	+	NA
ENSMUSG00000025427.16	1329.8	1.83649	0.087655	20.9513	1.82523e-97	6.29432e-95	chr18	77543805	77652857	-	NA
ENSMUSG00000031563.9	1897.46	-1.51633	0.0736459	-20.5895	3.41054e-94	1.16045e-91	chr8	48276993	48443959	-	NA
ENSMUSG00000022103.11	209.422	-4.93558	0.239761	-20.5854	3.70884e-94	1.24534e-91	chr14	71127559	71217278	+	NA
ENSMUSG00000041592.17	239.662	-4.63941	0.225381	-20.5847	3.76287e-94	1.24707e-91	chr11	113667199	113957872	-	NA
ENSMUSG00000041959.15	995.846	-10.2544	0.50097	-20.469	4.07019e-93	1.33163e-90	chr3	93462386	93471950	+	NA
ENSMUSG00000035566.8	919.536	-3.09277	0.151307	-20.4404	7.31418e-93	2.36266e-90	chr14	84681002	84776442	+	NA
ENSMUSG00000039257.12	306.682	-4.90303	0.240232	-20.4096	1.37493e-92	4.38584e-90	chr7	40547751	40580018	+	NA
ENSMUSG00000037071.4	8588.02	-1.74526	0.0858774	-20.3227	8.09326e-92	2.54978e-89	chr19	44382893	44396318	-	NA
ENSMUSG00000031273.17	412.654	-4.95259	0.244336	-20.2696	2.38476e-91	7.42154e-89	chrX	139948398	140257072	-	NA
ENSMUSG00000040146.10	260.124	-7.15618	0.354611	-20.1804	1.4569e-90	4.47936e-88	chr9	21880006	21900742	-	NA
ENSMUSG00000103793.2	299.5	-4.07808	0.202928	-20.0961	7.97514e-90	2.42283e-87	chr18	37840091	37974926	+	NA
ENSMUSG00000025889.14	189.146	-5.34437	0.266115	-20.0829	1.04088e-89	3.12495e-87	chr6	60708558	60806839	-	NA
ENSMUSG00000050100.15	150.343	-4.48398	0.225007	-19.9282	2.31794e-88	6.87808e-86	chr7	131150501	131159743	+	NA
ENSMUSG00000063320.12	214.81	-2.63902	0.133336	-19.7923	3.47114e-87	1.01816e-84	chr10	82455684	82459062	-	NA
ENSMUSG00000032666.17	5215.05	1.74752	0.0882996	19.7908	3.57584e-87	1.03695e-84	chr1	151728153	151965876	-	NA
ENSMUSG00000019718.9	608.036	2.14143	0.108268	19.779	4.51815e-87	1.29549e-84	chr12	72120201	72132213	-	NA
ENSMUSG00000046841.6	1484.95	-4.33024	0.219524	-19.7256	1.2988e-86	3.68268e-84	chr10	84362168	84369926	-	NA
ENSMUSG00000068794.8	296.724	4.35262	0.221331	19.6656	4.24933e-86	1.19163e-83	chr6	7997807	8192617	-	NA
ENSMUSG00000004043.15	178.586	-3.06923	0.15698	-19.5517	3.99164e-85	1.1072e-82	chr11	100750176	100775995	+	NA
ENSMUSG00000020363.7	1005.72	-4.69777	0.24184	-19.4251	4.73237e-84	1.29855e-81	chr11	49685004	49729440	+	NA
ENSMUSG00000020599.14	153.979	-4.54346	0.234716	-19.3573	1.76838e-83	4.80078e-81	chr11	109116180	109188955	-	NA
ENSMUSG00000024018.19	123.509	-3.83537	0.198349	-19.3364	2.65157e-83	7.12267e-81	chr17	29906330	29936018	-	NA
ENSMUSG00000034353.15	1034.31	-10.4786	0.542931	-19.3	5.3674e-83	1.42678e-80	chr1	91107543	91152918	+	NA
ENSMUSG00000022370.14	2204.54	-1.35103	0.0701497	-19.2592	1.18175e-82	3.10898e-80	chr15	55397489	55421144	-	NA
ENSMUSG00000027894.15	127.928	-4.04454	0.210136	-19.2473	1.48763e-82	3.87376e-80	chr3	107374858	107425334	-	NA
ENSMUSG00000035863.15	1523.16	-1.55105	0.0806391	-19.2345	1.90404e-82	4.908e-80	chr10	79629405	79656730	+	NA
ENSMUSG00000034245.11	207.342	-5.12146	0.269244	-19.0216	1.1294e-80	2.88212e-78	chr6	91133646	91151674	+	NA
ENSMUSG00000068522.5	150.348	-3.4284	0.180295	-19.0156	1.26799e-80	3.20374e-78	chr15	51903502	51909118	+	NA
ENSMUSG00000045062.5	271.295	3.37688	0.178628	18.9045	1.04655e-79	2.61833e-77	chr18	37474754	37478255	+	NA
ENSMUSG00000060427.16	955.969	-1.61434	0.0854413	-18.8941	1.27445e-79	3.15755e-77	chr8	70063507	70078199	-	NA
ENSMUSG00000110569.2	143.146	-6.08606	0.322136	-18.8928	1.30625e-79	3.20522e-77	chr8	72156848	72157612	-	NA
ENSMUSG00000062591.6	370.339	-6.45926	0.342353	-18.8673	2.12023e-79	5.15298e-77	chr17	57387065	57394782	-	NA
ENSMUSG00000071341.5	145.106	-5.71724	0.303654	-18.8281	4.44189e-79	1.06936e-76	chr6	85488102	85490571	-	NA
ENSMUSG00000030847.9	618.111	-9.73601	0.517376	-18.818	5.37354e-79	1.28156e-76	chr7	128125339	128148705	+	NA
ENSMUSG00000031622.17	5338.07	-1.00623	0.0537299	-18.7276	2.94968e-78	6.96972e-76	chr8	73449912	73484829	+	NA
ENSMUSG00000052133.17	1765.72	-2.37452	0.127062	-18.6878	6.22313e-78	1.45696e-75	chr16	35361514	35485102	+	NA
ENSMUSG00000045691.15	122.622	-3.32643	0.178124	-18.6747	7.94617e-78	1.84344e-75	chr14	55332240	55336443	+	NA
ENSMUSG00000028028.12	198.899	5.9896	0.320879	18.6662	9.32029e-78	2.14274e-75	chr3	127463958	127574176	-	NA
ENSMUSG00000034799.17	941.961	-1.70296	0.0914911	-18.6134	2.50342e-77	5.704e-75	chr8	72077060	72124401	-	NA
ENSMUSG00000030882.20	393.421	2.96044	0.159376	18.5753	5.09523e-77	1.15067e-74	chr7	105300033	105371006	+	NA
ENSMUSG00000074634.13	373.695	-2.38083	0.128244	-18.5649	6.18552e-77	1.38463e-74	chr13	119624574	120072595	+	NA
ENSMUSG00000017760.17	2785.9	1.30539	0.0703518	18.5552	7.40599e-77	1.64342e-74	chr2	164674792	164682952	+	NA
ENSMUSG00000019866.16	153.56	-3.17933	0.171889	-18.4964	2.20631e-76	4.8537e-74	chr10	43826631	44024849	-	NA
ENSMUSG00000027452.12	934.506	-3.57455	0.194577	-18.3709	2.24722e-75	4.90143e-73	chr2	150460024	150510420	-	NA
ENSMUSG00000002343.12	1120.65	-1.83638	0.100115	-18.3426	3.78232e-75	8.17976e-73	chr8	70672821	70687116	-	NA
ENSMUSG00000027227.8	2489.02	1.40482	0.0767705	18.2989	8.4429e-75	1.81054e-72	chr2	122065229	122095821	+	NA
ENSMUSG00000044068.9	184.552	6.42232	0.352993	18.1939	5.76855e-74	1.22673e-71	chr11	22923214	22926496	+	NA
ENSMUSG00000025964.16	114.389	-5.00976	0.276377	-18.1266	1.96669e-73	4.14776e-71	chr1	63485049	63635435	+	NA
ENSMUSG00000031570.18	761.721	-1.47826	0.0817805	-18.0759	4.93263e-73	1.03177e-70	chr8	26210063	26214914	+	NA
ENSMUSG00000004113.20	270.518	-8.08646	0.448601	-18.026	1.2184e-72	2.52784e-70	chr2	24493898	24653164	-	NA
ENSMUSG00000038236.9	602.35	-9.89214	0.550591	-17.9664	3.57114e-72	7.34936e-70	chr6	52191470	52198834	-	NA
ENSMUSG00000002799.7	390.827	2.72621	0.151836	17.955	4.38402e-72	8.95007e-70	chr12	112871438	112893396	-	NA
ENSMUSG00000114547.2	189.999	-3.72666	0.207891	-17.926	7.38762e-72	1.49623e-69	chr13	112730276	112731618	-	NA
ENSMUSG00000030281.17	158.73	-3.25243	0.182215	-17.8494	2.92075e-71	5.86887e-69	chr6	113448387	113460101	+	NA
ENSMUSG00000072946.13	156.107	-5.55678	0.311884	-17.8168	5.23553e-71	1.04379e-68	chr12	84332005	84362606	+	NA
ENSMUSG00000052415.6	138.151	-4.97055	0.279409	-17.7895	8.51864e-71	1.68517e-68	chr3	93349636	93356384	+	NA
ENSMUSG00000095562.9	1526.49	-6.72586	0.378458	-17.7717	1.17022e-70	2.29714e-68	chrX	168792654	168802277	+	NA
ENSMUSG00000003279.18	1183.64	-3.65796	0.206591	-17.7063	3.75109e-70	7.30717e-68	chr17	70276067	71128408	+	NA
ENSMUSG00000015568.17	449.387	-9.10742	0.514665	-17.6958	4.51546e-70	8.72955e-68	chr8	69333142	69360100	+	NA
ENSMUSG00000026879.15	736.783	-10.183	0.579845	-17.5615	4.85605e-69	9.3174e-67	chr2	35146391	35197904	+	NA
ENSMUSG00000020937.15	216.737	-5.23082	0.298408	-17.5291	8.59077e-69	1.63603e-66	chr11	102961129	102992484	-	NA
ENSMUSG00000016128.15	1401.46	-1.84013	0.104982	-17.5281	8.73866e-69	1.65187e-66	chr5	150960974	151157301	-	NA
ENSMUSG00000039166.17	863.147	-1.99802	0.114291	-17.4818	1.97284e-68	3.70182e-66	chr10	25044987	25183768	-	NA
ENSMUSG00000032369.14	197.273	-7.3813	0.422615	-17.4658	2.61084e-68	4.86321e-66	chr9	92131802	92154331	+	NA
ENSMUSG00000041670.20	90.4274	-4.13008	0.237202	-17.4117	6.72821e-68	1.24418e-65	chr1	22356474	22845203	-	NA
ENSMUSG00000034701.10	256.414	2.28194	0.131067	17.4105	6.86579e-68	1.26049e-65	chr2	79282864	79287095	-	NA
ENSMUSG00000041736.8	93.0617	-4.22333	0.243066	-17.3752	1.27114e-67	2.31701e-65	chr15	83447792	83458404	+	NA
ENSMUSG00000043154.16	2856.44	1.42891	0.0823045	17.3612	1.62181e-67	2.93525e-65	chr9	100982282	101128994	-	NA
ENSMUSG00000043602.6	160.393	-2.97943	0.171834	-17.339	2.38887e-67	4.29306e-65	chr11	70655034	70663754	+	NA
ENSMUSG00000056895.5	581.109	4.15053	0.23954	17.3271	2.93649e-67	5.2403e-65	chr11	58839745	58840359	+	NA
ENSMUSG00000037138.19	109.875	-4.05251	0.234587	-17.2751	7.24189e-67	1.28337e-64	chr1	38216406	38704036	-	NA
ENSMUSG00000022186.15	7026.51	-1.42472	0.0824909	-17.2712	7.74704e-67	1.36343e-64	chr15	4055864	4184826	+	NA
ENSMUSG00000026255.16	386.619	-4.40499	0.255727	-17.2253	1.71417e-66	2.99616e-64	chr1	87192084	87238561	+	NA
ENSMUSG00000030894.6	3119.42	1.151	0.0669351	17.1958	2.85718e-66	4.96002e-64	chr7	105394017	105401442	-	NA
ENSMUSG00000024588.11	1192.16	-1.28687	0.0752516	-17.1009	1.46213e-65	2.52108e-63	chr18	64585984	64623322	-	NA
ENSMUSG00000036879.16	3319.03	-1.15001	0.0676835	-16.991	9.57443e-65	1.6398e-62	chr8	86567587	86788005	+	NA
ENSMUSG00000032036.16	549.993	-2.37652	0.140653	-16.8963	4.79144e-64	8.15152e-62	chr9	34397189	34948012	+	NA
ENSMUSG00000062760.12	238.534	-3.55261	0.210352	-16.8889	5.43392e-64	9.18333e-62	chr15	84263403	84331298	-	NA
ENSMUSG00000059857.16	165.082	-6.74239	0.399784	-16.8651	8.12714e-64	1.36445e-61	chr3	109687355	110051327	-	NA
ENSMUSG00000068614.8	354.459	4.65819	0.276898	16.8228	1.66235e-63	2.77265e-61	chr2	113877762	113884029	-	NA
ENSMUSG00000029648.14	145.632	-5.75714	0.343107	-16.7795	3.45008e-63	5.71704e-61	chr5	147498413	147662821	-	NA
ENSMUSG00000039191.13	1644.31	-1.04598	0.0624335	-16.7535	5.33752e-63	8.78762e-61	chr5	53623493	53814704	+	NA
ENSMUSG00000103897.2	228.497	-5.56816	0.332385	-16.7521	5.46258e-63	8.93587e-61	chr18	37858758	37974926	+	NA
ENSMUSG00000028223.9	848.145	-10.8726	0.651037	-16.7004	1.30264e-62	2.11733e-60	chr4	15917239	15945507	-	NA
ENSMUSG00000025083.19	1039.41	-10.9077	0.654696	-16.6607	2.53201e-62	4.08951e-60	chr19	56900792	56996660	-	NA
ENSMUSG00000033208.8	879.557	2.54419	0.152856	16.6443	3.32829e-62	5.32333e-60	chr10	76089686	76096993	+	NA
ENSMUSG00000000957.12	600.522	-10.1118	0.607532	-16.6441	3.33764e-62	5.32333e-60	chr14	54669068	54682821	+	NA
ENSMUSG00000023272.5	1756.41	-1.66677	0.100227	-16.63	4.22385e-62	6.69493e-60	chr15	88703848	88710886	+	NA
ENSMUSG00000031758.11	92.5377	-5.20019	0.313065	-16.6106	5.8407e-62	9.20055e-60	chr8	117301138	117459730	-	NA
ENSMUSG00000039114.17	388.096	-9.25598	0.557284	-16.6091	5.9897e-62	9.37737e-60	chr13	36909334	36919105	-	NA
ENSMUSG00000046387.6	568.311	1.96154	0.118474	16.5567	1.43286e-61	2.22958e-59	chr18	37617847	37622507	+	NA
ENSMUSG00000022307.17	4121.87	-1.70397	0.1032	-16.5113	3.04168e-61	4.70428e-59	chr15	41310877	41724444	+	NA
ENSMUSG00000006403.14	4675.82	2.18002	0.133149	16.3727	2.99405e-60	4.60272e-58	chr1	171077989	171088206	+	NA
ENSMUSG00000063626.7	271.396	-8.54746	0.522462	-16.36	3.69296e-60	5.64315e-58	chr8	29136744	29709664	-	NA
ENSMUSG00000039168.16	1121.99	-1.54704	0.0946136	-16.3511	4.26979e-60	6.48575e-58	chr15	31224459	31274487	+	NA
ENSMUSG00000118669.2	154.291	-3.53277	0.216162	-16.3432	4.86499e-60	7.34614e-58	chr16	18166045	18225826	+	NA
ENSMUSG00000054823.18	4650.66	-1.0106	0.0619411	-16.3155	7.66145e-60	1.15007e-57	chr8	26091616	26209694	+	NA
ENSMUSG00000042246.6	573.654	1.2785	0.0784477	16.2975	1.02742e-59	1.53325e-57	chr7	118135063	118183959	-	NA
ENSMUSG00000031626.19	277.926	-2.03813	0.125242	-16.2735	1.52115e-59	2.25688e-57	chr8	45960824	46280943	+	NA
ENSMUSG00000044350.15	201.571	-7.65986	0.471398	-16.2493	2.26073e-59	3.33478e-57	chr14	77261639	77274344	-	NA
ENSMUSG00000022332.9	2292.89	-1.56666	0.0964896	-16.2366	2.77948e-59	4.07641e-57	chr15	68800268	68973060	+	NA
ENSMUSG00000071984.13	1563.44	-2.93803	0.181436	-16.1932	5.63201e-59	8.21276e-57	chr17	7957400	8046134	-	NA
ENSMUSG00000043004.14	327.092	4.05864	0.250966	16.1721	7.94005e-59	1.15126e-56	chr14	19922626	20027695	-	NA
ENSMUSG00000017754.14	129.879	4.42295	0.273526	16.1701	8.19217e-59	1.18111e-56	chr2	164681437	164699631	-	NA
ENSMUSG00000007682.9	125.101	-2.96438	0.183431	-16.1607	9.54371e-59	1.36824e-56	chr12	90691325	90705812	-	NA
ENSMUSG00000031545.7	6131.86	-1.01263	0.0627518	-16.1371	1.39924e-58	1.99481e-56	chr8	23661280	23698362	-	NA
ENSMUSG00000040272.15	151.961	-7.24806	0.451814	-16.0421	6.4897e-58	9.20059e-56	chr2	93663811	93680288	-	NA
ENSMUSG00000022489.7	808.397	-2.94286	0.183649	-16.0244	8.63066e-58	1.21683e-55	chr15	103411460	103438479	+	NA
ENSMUSG00000032452.13	95.1851	-4.38101	0.273492	-16.0188	9.44458e-58	1.32426e-55	chr9	97326447	97915234	-	NA
ENSMUSG00000062866.17	578.515	-3.35679	0.210109	-15.9764	1.8661e-57	2.60224e-55	chr10	13083460	13350156	-	NA
ENSMUSG00000055567.19	280.244	-2.54312	0.159247	-15.9697	2.07795e-57	2.88192e-55	chr1	66507525	66738307	+	NA
ENSMUSG00000040181.15	166.707	2.92734	0.183528	15.9503	2.83319e-57	3.90811e-55	chr1	162657129	162694179	-	NA
ENSMUSG00000005338.15	187.712	-7.54896	0.474191	-15.9197	4.62874e-57	6.35059e-55	chr1	173160824	173195261	-	NA
ENSMUSG00000021242.10	7223.98	0.993718	0.062431	15.9171	4.82537e-57	6.58495e-55	chr12	84801335	84819926	-	NA
ENSMUSG00000103983.2	225.237	1.97016	0.123815	15.9121	5.2193e-57	7.08464e-55	chr1	171148168	171153745	-	NA
ENSMUSG00000095597.3	3964.67	1.56194	0.0982173	15.9029	6.04951e-57	8.16811e-55	chrX	151692500	151693151	-	NA
ENSMUSG00000001418.14	1728.21	1.18144	0.0743303	15.8944	6.9269e-57	9.30356e-55	chr3	88232329	88238620	+	NA
ENSMUSG00000043635.13	261.272	-3.87058	0.243595	-15.8894	7.50035e-57	1.0021e-54	chr5	89824945	90031193	-	NA
ENSMUSG00000047793.14	2588.35	3.18849	0.20069	15.8877	7.7162e-57	1.02557e-54	chr1	93163562	93228787	+	NA
ENSMUSG00000021411.17	158.347	-7.30622	0.460066	-15.8808	8.60593e-57	1.1379e-54	chr13	34811816	34837469	-	NA
ENSMUSG00000101316.2	231.265	-1.89296	0.119558	-15.833	1.843e-56	2.42431e-54	chr11	16585108	16586066	-	NA
ENSMUSG00000015342.7	73.1137	-4.26464	0.269411	-15.8295	1.94711e-56	2.54812e-54	chrX	9138994	9179489	+	NA
ENSMUSG00000061904.13	11346.9	-1.11925	0.0709336	-15.7788	4.35446e-56	5.66946e-54	chr10	90952435	90959921	-	NA
ENSMUSG00000020044.14	1796.65	1.98471	0.126872	15.6435	3.68093e-55	4.7682e-53	chr10	86136235	86185370	+	NA
ENSMUSG00000019731.14	2828.06	-1.06793	0.0683846	-15.6166	5.61611e-55	7.23825e-53	chr8	73234484	73246458	-	NA
ENSMUSG00000023169.16	200.26	5.99223	0.384963	15.5657	1.24451e-54	1.59592e-52	chr15	96469298	96540794	-	NA
ENSMUSG00000080078.3	74.5146	-4.72694	0.304855	-15.5055	3.18383e-54	4.06241e-52	chr1	146601318	146604828	+	NA
ENSMUSG00000001497.19	178.449	-4.57817	0.295423	-15.497	3.63483e-54	4.61479e-52	chr12	56738551	56759607	+	NA
ENSMUSG00000118012.2	495.185	-1.70466	0.110154	-15.4753	5.09237e-54	6.43328e-52	chr18	82712411	82719461	+	NA
ENSMUSG00000068615.5	84.1741	-3.79425	0.245438	-15.4591	6.54808e-54	8.23155e-52	chr2	113840081	113844100	-	NA
ENSMUSG00000003033.16	4250.4	-1.0479	0.0680725	-15.3939	1.79724e-53	2.24823e-51	chr8	72993861	73011229	+	NA
ENSMUSG00000021068.18	3530.61	1.18516	0.0771602	15.3597	3.05149e-53	3.79859e-51	chr12	70058208	70160491	-	NA
ENSMUSG00000015090.14	618.99	1.88854	0.123087	15.3432	3.93302e-53	4.87218e-51	chr2	25356720	25360058	-	NA
ENSMUSG00000032724.6	3991.42	1.38191	0.0902221	15.3168	5.90691e-53	7.28204e-51	chr2	103396654	103548768	+	NA
ENSMUSG00000037962.8	317.042	-3.49296	0.22842	-15.2918	8.66822e-53	1.06348e-50	chr5	125080284	125089611	+	NA
ENSMUSG00000048376.7	3955.55	1.07742	0.0705098	15.2805	1.03205e-52	1.26014e-50	chr13	95738310	95754995	-	NA
ENSMUSG00000061601.16	263.56	-3.27141	0.214164	-15.2752	1.11833e-52	1.35898e-50	chr5	14564931	14913473	+	NA
ENSMUSG00000078161.9	104.582	-3.4785	0.227919	-15.262	1.36967e-52	1.65652e-50	chr3	154369495	154473427	+	NA
ENSMUSG00000036613.9	680.39	1.41439	0.09299	15.2102	3.02724e-52	3.64397e-50	chr12	28801801	28919864	+	NA
ENSMUSG00000024885.10	666.626	1.41972	0.0935025	15.1838	4.53062e-52	5.42802e-50	chr19	3963490	3979808	-	NA
ENSMUSG00000027316.16	73.1225	-3.96213	0.261102	-15.1746	5.20846e-52	6.21096e-50	chr2	130881551	130885008	-	NA
ENSMUSG00000027716.14	211.098	-2.79508	0.184712	-15.1321	9.94603e-52	1.18052e-49	chr3	36674630	36744316	-	NA
ENSMUSG00000026737.13	1142.82	0.956829	0.0632661	15.1239	1.12674e-51	1.33117e-49	chr2	18847065	19002937	-	NA
ENSMUSG00000040174.15	412.984	-1.28876	0.0852941	-15.1095	1.40093e-51	1.64748e-49	chr2	93810894	93841152	-	NA
ENSMUSG00000006356.11	4483.9	0.999163	0.0663268	15.0642	2.78397e-51	3.25891e-49	chr12	113103855	113109126	+	NA
ENSMUSG00000032875.9	114.019	-6.69977	0.445884	-15.0258	4.97392e-51	5.79587e-49	chr7	100518958	100581314	-	NA
ENSMUSG00000044367.8	182.271	-7.97412	0.530798	-15.0229	5.19836e-51	6.02986e-49	chr11	70107614	70111890	-	NA
ENSMUSG00000040254.12	96.9659	-4.15432	0.277092	-14.9925	8.21469e-51	9.48555e-49	chr5	12433351	12638915	+	NA
ENSMUSG00000027533.11	7474.41	-1.55837	0.104115	-14.9677	1.1943e-50	1.37285e-48	chr3	10077607	10081667	+	NA
ENSMUSG00000040152.9	169.111	-5.993	0.401996	-14.9081	2.91928e-50	3.34067e-48	chr2	117942356	117957614	+	NA
ENSMUSG00000029675.13	759.479	-1.71992	0.115421	-14.9013	3.23258e-50	3.68269e-48	chr5	134731446	134776177	-	NA
ENSMUSG00000022150.17	172.665	-7.72132	0.518438	-14.8934	3.63608e-50	4.12396e-48	chr15	6329268	6470193	+	NA
ENSMUSG00000020524.17	94.4668	-4.3603	0.292891	-14.8871	3.99756e-50	4.51388e-48	chr11	56902212	57221070	+	NA
ENSMUSG00000073424.10	212.78	4.45704	0.299501	14.8815	4.34359e-50	4.883e-48	chr17	32904600	32922326	+	NA
ENSMUSG00000001334.11	85.5088	-4.70171	0.316311	-14.8642	5.62667e-50	6.29767e-48	chr4	129030476	129038386	+	NA
ENSMUSG00000028023.17	233.563	-3.75135	0.253295	-14.8102	1.25903e-49	1.40302e-47	chr3	128993526	129013240	+	NA
ENSMUSG00000042826.14	359.358	-3.03727	0.205085	-14.8099	1.26487e-49	1.4034e-47	chr11	69686893	69692683	-	NA
ENSMUSG00000036106.16	401.91	-3.36524	0.227279	-14.8066	1.32723e-49	1.46622e-47	chr15	84553820	84587874	+	NA
ENSMUSG00000040236.5	1706.97	-1.09832	0.0745937	-14.7241	4.51521e-49	4.96653e-47	chr8	3726298	3731255	+	NA
ENSMUSG00000023913.18	312.278	-8.94095	0.607752	-14.7115	5.43773e-49	5.9556e-47	chr17	43878988	43923092	+	NA
ENSMUSG00000033022.9	222.897	-1.9494	0.132538	-14.7082	5.70907e-49	6.22605e-47	chr18	46846259	46861462	-	NA
ENSMUSG00000085956.3	131.367	2.86321	0.195389	14.6539	1.27182e-48	1.38108e-46	chr3	94922935	94927449	+	NA
ENSMUSG00000027907.5	65.689	-4.74309	0.323923	-14.6427	1.50068e-48	1.62271e-46	chr3	93427794	93433594	+	NA
ENSMUSG00000079387.11	78.3417	-3.18833	0.218143	-14.6158	2.22711e-48	2.39804e-46	chrX	147640635	147707135	+	NA
ENSMUSG00000030560.18	2052.12	-13.436	0.921199	-14.5853	3.48185e-48	3.73333e-46	chr7	87927292	87960096	+	NA
ENSMUSG00000035451.8	296.608	-1.83185	0.125694	-14.5739	4.11921e-48	4.39825e-46	chr12	57587413	57593702	-	NA
ENSMUSG00000038860.16	295.7	1.79419	0.123259	14.5562	5.3328e-48	5.67033e-46	chr2	32876235	33021666	-	NA
ENSMUSG00000024039.16	1700.63	-5.09253	0.349909	-14.5539	5.51897e-48	5.84392e-46	chr17	31827867	31856212	-	NA
ENSMUSG00000000594.8	5960.34	2.73588	0.188047	14.5489	5.93616e-48	6.25971e-46	chr11	54988940	55003855	+	NA
ENSMUSG00000074457.11	1593.32	-1.86894	0.12847	-14.5477	6.04082e-48	6.34386e-46	chr3	90444560	90450458	+	NA
ENSMUSG00000048915.13	88.5588	-4.0318	0.277954	-14.5053	1.12203e-47	1.17349e-45	chr17	62911178	63188312	-	NA
ENSMUSG00000090704.3	97.8396	-2.94489	0.203109	-14.499	1.22886e-47	1.27997e-45	chr17	54726707	54727869	+	NA
ENSMUSG00000034687.9	146.625	-3.83989	0.26498	-14.4913	1.37606e-47	1.42747e-45	chr5	96521813	96932587	+	NA
ENSMUSG00000022788.17	334.132	2.06242	0.14269	14.4538	2.3725e-47	2.45116e-45	chr16	16234780	16418413	-	NA
ENSMUSG00000040274.12	1316.23	1.96168	0.135782	14.4473	2.60833e-47	2.68395e-45	chr5	3391484	3581008	+	NA
ENSMUSG00000022337.8	1342.42	-1.24001	0.0859893	-14.4206	3.84166e-47	3.93716e-45	chr15	43340624	43391159	+	NA
ENSMUSG00000042348.11	546.525	-1.19997	0.0833323	-14.3998	5.18576e-47	5.29342e-45	chr13	113931040	114293997	+	NA
ENSMUSG00000026648.19	723.744	1.56401	0.108626	14.3982	5.31433e-47	5.40304e-45	chr2	3425167	3465167	+	NA
ENSMUSG00000096014.2	4885.98	-1.68212	0.116836	-14.3973	5.38211e-47	5.45024e-45	chr8	12445294	12450126	+	NA
ENSMUSG00000025937.7	796.93	-13.2267	0.918716	-14.397	5.40523e-47	5.45202e-45	chr1	13693553	13730770	-	NA
ENSMUSG00000030225.12	118.31	-2.55413	0.177901	-14.3571	9.62056e-47	9.66564e-45	chr6	137731543	137834338	+	NA
ENSMUSG00000118664.1	2537.92	-1.60905	0.11212	-14.3511	1.04889e-46	1.04967e-44	chr8	39472998	39619367	+	NA
ENSMUSG00000039620.18	94.7049	-4.68766	0.326805	-14.3439	1.16332e-46	1.15964e-44	chr8	36924701	36983724	+	NA
ENSMUSG00000044786.7	319.547	1.86096	0.129837	14.333	1.36059e-46	1.351e-44	chr7	28076208	28079678	-	NA
ENSMUSG00000043629.13	87.6622	-3.79232	0.26552	-14.2826	2.80777e-46	2.77719e-44	chr1	52961482	53059338	-	NA
ENSMUSG00000074715.4	62.8764	-4.4339	0.310612	-14.2747	3.14678e-46	3.10049e-44	chr13	120085354	120115895	+	NA
ENSMUSG00000022208.13	336.583	-2.89231	0.202742	-14.266	3.56346e-46	3.49753e-44	chr14	55344282	55354392	-	NA
ENSMUSG00000058833.12	2619.39	-1.35379	0.0949298	-14.261	3.82964e-46	3.74439e-44	chr8	70956941	70959402	-	NA
ENSMUSG00000022231.11	195.624	-3.0456	0.213698	-14.2519	4.36506e-46	4.2516e-44	chr15	32244955	32696487	+	NA
ENSMUSG00000078480.4	82.8759	-2.57769	0.180925	-14.2473	4.66052e-46	4.52212e-44	chr4	88517411	88518047	-	NA
ENSMUSG00000027273.14	66.3138	-4.26638	0.29962	-14.2393	5.22465e-46	5.0503e-44	chr2	136555372	136624348	+	NA
ENSMUSG00000060314.14	65.0719	-3.42496	0.240818	-14.2222	6.67599e-46	6.42885e-44	chr7	140387361	140402091	-	NA
ENSMUSG00000060935.7	1660.27	-1.06837	0.0752327	-14.2009	9.04473e-46	8.67716e-44	chr10	84938490	84956482	+	NA
ENSMUSG00000120194.1	220.754	1.76739	0.124533	14.1921	1.02514e-45	9.79792e-44	chr1	172167819	172168641	-	NA
ENSMUSG00000070372.12	1964.43	-1.19555	0.0843547	-14.1729	1.34802e-45	1.28359e-43	chr3	104730094	104771821	-	NA
ENSMUSG00000074384.5	78.4603	-3.88399	0.274364	-14.1564	1.70603e-45	1.61845e-43	chr8	37460757	37462687	+	NA
ENSMUSG00000096768.9	861.224	-8.28732	0.586914	-14.1202	2.85344e-45	2.69692e-43	chrY	90796006	90827734	+	NA
ENSMUSG00000049164.8	444.905	2.31969	0.164477	14.1034	3.61673e-45	3.40573e-43	chr19	40883148	40906391	+	NA
ENSMUSG00000038542.15	2054.16	-0.918169	0.0651582	-14.0914	4.29197e-45	4.02672e-43	chr8	13127188	13155459	-	NA
ENSMUSG00000021814.18	86.4818	-3.0687	0.217791	-14.0901	4.36951e-45	4.08446e-43	chr14	20505327	20530201	-	NA
ENSMUSG00000041203.10	5200.51	-1.03986	0.0738824	-14.0745	5.44988e-45	5.07575e-43	chr8	85753451	85756915	+	NA
ENSMUSG00000007891.17	3726.46	1.49633	0.106459	14.0555	7.12624e-45	6.61289e-43	chr7	141929647	141941775	-	NA
ENSMUSG00000044550.12	95.4494	-5.85585	0.417759	-14.0173	1.2217e-44	1.12958e-42	chrX	135491590	135569127	+	NA
ENSMUSG00000038370.7	953.024	-6.16855	0.440508	-14.0033	1.48836e-44	1.37117e-42	chr1	171000830	171023837	-	NA
ENSMUSG00000031134.17	2833.58	1.53647	0.109747	14.0001	1.5556e-44	1.42796e-42	chrX	56428889	56438396	-	NA
ENSMUSG00000064325.5	486.645	-3.33111	0.237991	-13.9968	1.62971e-44	1.49063e-42	chr8	80692479	80784635	-	NA
ENSMUSG00000070002.8	1739.74	-1.05529	0.0754192	-13.9923	1.737e-44	1.58309e-42	chr8	70992106	71045508	+	NA
ENSMUSG00000005534.11	3157.12	-1.31604	0.0941063	-13.9846	1.93658e-44	1.7587e-42	chr8	3172060	3329617	-	NA
ENSMUSG00000031993.8	909.921	-12.8408	0.918928	-13.9736	2.25843e-44	2.04372e-42	chr9	30338403	30378029	+	NA
ENSMUSG00000007610.16	1791.85	-1.22025	0.0873431	-13.9707	2.35258e-44	2.1214e-42	chr8	71940746	71952227	+	NA
ENSMUSG00000030760.15	872.81	1.19978	0.0859248	13.9631	2.61716e-44	2.35167e-42	chr7	97855595	97970415	-	NA
ENSMUSG00000070000.14	747.111	-1.89603	0.13588	-13.9537	2.98752e-44	2.67504e-42	chr8	72161030	72178360	-	NA
ENSMUSG00000031609.4	785.934	-1.34067	0.0962137	-13.9343	3.92257e-44	3.5e-42	chr8	57935740	57940894	-	NA
ENSMUSG00000022523.11	167.274	-3.88024	0.278541	-13.9306	4.1289e-44	3.67127e-42	chr16	27978849	28571820	-	NA
ENSMUSG00000045876.5	258.919	3.45826	0.248454	13.9191	4.85155e-44	4.29884e-42	chr18	37488173	37491657	+	NA
ENSMUSG00000016028.12	720.504	3.84729	0.276703	13.904	5.98849e-44	5.27184e-42	chr15	85783129	85918404	-	NA
ENSMUSG00000024172.11	63.7959	-3.55793	0.255893	-13.904	5.99096e-44	5.27184e-42	chr17	55752382	55821582	+	NA
ENSMUSG00000001910.6	11134.9	-0.921113	0.0663185	-13.8892	7.36074e-44	6.45494e-42	chr8	85397107	85414531	-	NA
ENSMUSG00000037997.13	568.722	-1.36932	0.0986684	-13.8779	8.61802e-44	7.53162e-42	chr6	127423802	127471224	+	NA
ENSMUSG00000028214.14	71.755	-4.82668	0.348235	-13.8604	1.10061e-43	9.58582e-42	chr4	11704456	11714752	+	NA
ENSMUSG00000043003.15	130.79	-5.96046	0.430294	-13.8521	1.23585e-43	1.07271e-41	chr4	73632815	73709231	-	NA
ENSMUSG00000031595.10	196.51	-8.49361	0.613783	-13.8381	1.50068e-43	1.29816e-41	chr8	41379248	41443822	+	NA
ENSMUSG00000060568.15	135.766	-2.81877	0.204102	-13.8106	2.20037e-43	1.89701e-41	chr1	166828985	166918871	+	NA
ENSMUSG00000015143.16	1650.97	1.4383	0.104267	13.7944	2.75475e-43	2.36695e-41	chr12	80214320	80307145	-	NA
ENSMUSG00000026649.15	63.2109	-3.9342	0.285434	-13.7833	3.21419e-43	2.75244e-41	chr1	170941486	170954536	+	NA
ENSMUSG00000085379.3	305.097	1.52871	0.110923	13.7818	3.28137e-43	2.80058e-41	chr11	58856573	58868907	-	NA
ENSMUSG00000032702.17	1616.16	-2.61506	0.189885	-13.7718	3.76881e-43	3.20588e-41	chr19	25214338	25411860	+	NA
ENSMUSG00000022013.5	257.472	-9.15195	0.66478	-13.7669	4.03279e-43	3.41902e-41	chr14	78058120	78112565	-	NA
ENSMUSG00000000759.15	3423.78	-0.982946	0.0714086	-13.7651	4.13277e-43	3.49219e-41	chr8	12664276	12722248	-	NA
ENSMUSG00000046610.16	164.327	2.03663	0.148018	13.7594	4.47457e-43	3.76853e-41	chr18	65831338	65884672	+	NA
ENSMUSG00000031585.14	2038.5	-1.49446	0.108977	-13.7135	8.4267e-43	7.07372e-41	chr8	34221860	34267201	+	NA
ENSMUSG00000020950.11	1176.65	-1.42363	0.103848	-13.7088	8.99574e-43	7.52664e-41	chr12	49429442	49433644	+	NA
ENSMUSG00000047992.12	139.463	-3.47669	0.254203	-13.6768	1.39644e-42	1.16456e-40	chr18	84737360	84758561	+	NA
ENSMUSG00000032649.15	883.568	1.63689	0.119694	13.6757	1.41882e-42	1.17938e-40	chr1	152275580	152386446	+	NA
ENSMUSG00000037855.16	926.46	-0.93641	0.0685212	-13.666	1.62099e-42	1.34306e-40	chr10	67721932	67748492	-	NA
ENSMUSG00000050071.9	119.873	-7.18723	0.526222	-13.6582	1.80408e-42	1.48992e-40	chrX	135114720	135116262	-	NA
ENSMUSG00000121042.1	199.743	-8.51464	0.624285	-13.639	2.34668e-42	1.93177e-40	chr1	182082890	182093596	+	NA
ENSMUSG00000040811.16	68.4196	4.07499	0.29889	13.6338	2.5223e-42	2.06966e-40	chr7	18910345	18940407	+	NA
ENSMUSG00000031568.17	2150.02	-0.86965	0.0639692	-13.5948	4.29863e-42	3.51592e-40	chr8	47986698	48005990	+	NA
ENSMUSG00000071253.9	1141.82	-1.12529	0.0829288	-13.5693	6.086e-42	4.96194e-40	chr10	62756411	62782277	+	NA
ENSMUSG00000026596.14	6125.15	1.10879	0.0818297	13.55	7.92419e-42	6.44005e-40	chr1	156386355	156477138	+	NA
ENSMUSG00000021130.9	1903.08	2.14016	0.158041	13.5417	8.86647e-42	7.18297e-40	chr12	80565050	80677746	+	NA
ENSMUSG00000040396.13	2411.66	-0.812179	0.0599949	-13.5375	9.39615e-42	7.58798e-40	chr8	10027706	10042155	+	NA
ENSMUSG00000003948.18	314.899	1.51362	0.112014	13.5127	1.31604e-41	1.05943e-39	chr11	90140281	90169415	+	NA
ENSMUSG00000097877.3	218.284	2.89243	0.214155	13.5062	1.43698e-41	1.15315e-39	chr5	104257082	104267553	+	NA
ENSMUSG00000031592.11	7446.74	-1.11353	0.0824716	-13.5019	1.52342e-41	1.21868e-39	chr8	41692788	41785381	+	NA
ENSMUSG00000036377.20	6446.02	1.39041	0.103578	13.4238	4.38855e-41	3.49973e-39	chr5	76804358	77021401	+	NA
ENSMUSG00000030208.16	3117.82	1.89995	0.141801	13.3987	6.14937e-41	4.88865e-39	chr6	135339542	135360171	+	NA
ENSMUSG00000031486.16	358.568	-1.57097	0.117251	-13.3984	6.18115e-41	4.89866e-39	chr8	27575610	27613464	+	NA
ENSMUSG00000034457.11	107.732	3.58761	0.267826	13.3953	6.44204e-41	5.08961e-39	chrX	96377445	96420822	-	NA
ENSMUSG00000036095.12	944.194	-1.12042	0.0836568	-13.393	6.64038e-41	5.23012e-39	chr12	37867724	38684238	+	NA
ENSMUSG00000030659.15	304.932	-2.09	0.156456	-13.3584	1.05833e-40	8.30997e-39	chr7	116103603	116139819	+	NA
ENSMUSG00000031558.16	67.4421	-4.56797	0.342305	-13.3447	1.27116e-40	9.95053e-39	chr5	48140479	48465075	+	NA
ENSMUSG00000018169.13	578.935	2.1594	0.161946	13.3341	1.46669e-40	1.1446e-38	chr15	78640081	78657675	-	NA
ENSMUSG00000033009.16	1617.86	-0.968214	0.0726351	-13.3298	1.55216e-40	1.20761e-38	chr8	94763825	94794549	+	NA
ENSMUSG00000028636.15	169.966	1.65127	0.124102	13.3057	2.14457e-40	1.66344e-38	chr4	119275726	119279617	-	NA
ENSMUSG00000034379.10	51.8486	-4.6592	0.350203	-13.3043	2.18534e-40	1.68993e-38	chr16	35861559	35864298	+	NA
ENSMUSG00000073418.5	254.823	3.95568	0.297679	13.2884	2.70281e-40	2.08378e-38	chr17	34947353	34962856	-	NA
ENSMUSG00000043091.10	1047.76	-2.13139	0.160459	-13.2831	2.90197e-40	2.23058e-38	chr15	98927771	98935991	+	NA
ENSMUSG00000031760.10	2405.65	-2.30315	0.173692	-13.2599	3.95261e-40	3.02903e-38	chr8	94879234	94880774	+	NA
ENSMUSG00000003037.17	3492.7	-0.851093	0.064213	-13.2542	4.26629e-40	3.25963e-38	chr8	72915043	72937748	+	NA
ENSMUSG00000044285.10	2416.57	-1.82347	0.137619	-13.2501	4.50587e-40	3.4324e-38	chr14	46321482	46322457	+	NA
ENSMUSG00000031634.14	1498.43	-1.54349	0.116561	-13.2419	5.02424e-40	3.81588e-38	chr8	46428564	46449995	+	NA
ENSMUSG00000097039.10	1790.51	-2.36662	0.178738	-13.2407	5.10612e-40	3.86656e-38	chr15	61909816	62249945	+	NA
ENSMUSG00000003355.8	98.3853	-2.90958	0.220086	-13.2202	6.70774e-40	5.06434e-38	chr15	98622246	98626079	-	NA
ENSMUSG00000038506.14	1510.28	-1.15331	0.0873662	-13.2008	8.67633e-40	6.53131e-38	chr8	13305962	13338131	-	NA
ENSMUSG00000022237.18	326.849	-2.28248	0.172955	-13.1969	9.13599e-40	6.8571e-38	chr15	31291623	31367872	-	NA
ENSMUSG00000022641.16	1615.41	-0.720557	0.054675	-13.1789	1.16045e-39	8.68435e-38	chr16	50012206	50252753	-	NA
ENSMUSG00000103081.4	102.71	2.56274	0.194497	13.1763	1.2018e-39	8.96747e-38	chr18	37894853	37974923	+	NA
ENSMUSG00000057193.9	2566.94	0.737778	0.0560113	13.1719	1.27293e-39	9.47056e-38	chr9	21231993	21266324	+	NA
ENSMUSG00000097327.9	174.629	-8.59018	0.653272	-13.1495	1.71362e-39	1.27121e-37	chr10	21988948	22024722	-	NA
ENSMUSG00000003849.9	87.4371	3.90951	0.297335	13.1485	1.73578e-39	1.28021e-37	chr8	108114856	108129838	-	NA
ENSMUSG00000022490.8	281.224	-3.76791	0.286564	-13.1486	1.73349e-39	1.28021e-37	chr15	103438705	103446430	-	NA
ENSMUSG00000121226.1	105.995	-3.65725	0.278183	-13.1469	1.77256e-39	1.30357e-37	chr11	69692951	69693780	-	NA
ENSMUSG00000015745.10	1033.3	-1.35919	0.103585	-13.1215	2.47901e-39	1.81787e-37	chr3	95895740	95903313	-	NA
ENSMUSG00000014313.16	4714.7	-0.83199	0.0634474	-13.1131	2.77173e-39	2.0267e-37	chr15	35926031	35938392	-	NA
ENSMUSG00000037296.8	1079.76	-1.17408	0.0895615	-13.1092	2.91731e-39	2.12705e-37	chr8	26275315	26294003	+	NA
ENSMUSG00000020061.19	388.081	6.604	0.503905	13.1056	3.05646e-39	2.22216e-37	chr10	88354140	88441014	-	NA
ENSMUSG00000031548.8	408.738	-12.2597	0.935695	-13.1022	3.19648e-39	2.31736e-37	chr8	23901517	23939648	+	NA
ENSMUSG00000030616.17	106.574	-2.9443	0.225211	-13.0735	4.66388e-39	3.3716e-37	chr7	89951459	90059927	+	NA
ENSMUSG00000038332.14	1964.88	-1.29364	0.0990406	-13.0617	5.4497e-39	3.92855e-37	chr10	41685930	41784420	+	NA
ENSMUSG00000001288.16	553.952	-2.29616	0.175807	-13.0607	5.523e-39	3.97018e-37	chr15	102143372	102165952	-	NA
ENSMUSG00000061356.14	49.8734	-3.75975	0.287954	-13.0568	5.81515e-39	4.16845e-37	chr14	65835994	65885980	+	NA
ENSMUSG00000037251.6	1307.72	-0.800242	0.0615316	-13.0054	1.14027e-38	8.15086e-37	chr8	26470631	26484161	-	NA
ENSMUSG00000021136.14	11919.7	1.73135	0.13316	13.002	1.1912e-38	8.49115e-37	chr12	81073581	81233188	+	NA
ENSMUSG00000075592.11	155.266	7.9248	0.609533	13.0014	1.20073e-38	8.53525e-37	chr14	56091466	56112193	+	NA
ENSMUSG00000054717.8	20010.1	-1.60933	0.123944	-12.9843	1.50182e-38	1.06458e-36	chr8	57964940	57969033	+	NA
ENSMUSG00000020238.15	4154.79	-1.06574	0.0821192	-12.9779	1.63272e-38	1.15416e-36	chr10	81322082	81332226	-	NA
ENSMUSG00000022285.18	15447.3	-0.947616	0.0730438	-12.9733	1.73499e-38	1.22307e-36	chr15	36771013	36797173	-	NA
ENSMUSG00000031665.8	4690.66	-1.23647	0.0953782	-12.9638	1.96171e-38	1.37909e-36	chr8	89753862	89770790	-	NA
ENSMUSG00000025777.9	67.7275	-3.73375	0.288147	-12.9578	2.12298e-38	1.48836e-36	chr1	17215585	17234495	+	NA
ENSMUSG00000038102.16	3540.85	-0.755713	0.0584689	-12.925	3.25157e-38	2.27334e-36	chr8	47943149	47986505	-	NA
ENSMUSG00000025529.15	213.037	8.64446	0.670428	12.8939	4.86962e-38	3.3953e-36	chrX	111510222	111544767	+	NA
ENSMUSG00000035896.6	125.877	4.41039	0.342325	12.8836	5.56655e-38	3.87065e-36	chr14	51382454	51384242	-	NA
ENSMUSG00000051147.11	137.644	-2.18871	0.169972	-12.8769	6.07023e-38	4.20941e-36	chr8	67947509	67955236	+	NA
ENSMUSG00000070315.14	140.172	2.06791	0.161	12.8441	9.27729e-38	6.41592e-36	chr9	35028023	35042218	+	NA
ENSMUSG00000019428.17	7701.51	-0.757906	0.0590326	-12.8388	9.94306e-38	6.85775e-36	chr8	70980373	70987978	+	NA
ENSMUSG00000038831.17	1487.11	1.13305	0.0884505	12.81	1.44093e-37	9.91135e-36	chr2	33023428	33261498	-	NA
ENSMUSG00000034765.7	1261.04	2.43009	0.189806	12.803	1.57747e-37	1.08213e-35	chr19	53517539	53530862	+	NA
ENSMUSG00000022338.9	1932.24	-1.12375	0.0877981	-12.7992	1.6558e-37	1.13282e-35	chr15	44291437	44301652	+	NA
ENSMUSG00000027298.18	4823.9	1.44218	0.112717	12.7948	1.75387e-37	1.19671e-35	chr2	119628213	119648585	+	NA
ENSMUSG00000024076.11	131.589	-3.38541	0.264625	-12.7932	1.78933e-37	1.21765e-35	chr17	78815492	78934837	+	NA
ENSMUSG00000058317.13	885.051	-1.08392	0.0848071	-12.781	2.09404e-37	1.42122e-35	chr14	3575428	3896121	+	NA
ENSMUSG00000050697.10	2155.35	-0.870718	0.0681437	-12.7777	2.18506e-37	1.47906e-35	chr15	5173342	5211380	+	NA
ENSMUSG00000052031.9	210.113	1.50346	0.117676	12.7763	2.22502e-37	1.50213e-35	chr17	7222409	7228555	-	NA
ENSMUSG00000021091.9	93.6875	-2.92053	0.229038	-12.7513	3.06685e-37	2.06498e-35	chr12	104372987	104380588	+	NA
ENSMUSG00000040616.4	99.8374	-7.29023	0.572104	-12.7428	3.41761e-37	2.2951e-35	chr4	141758302	141811615	-	NA
ENSMUSG00000031660.15	5404.68	-0.842264	0.0661186	-12.7387	3.60421e-37	2.41407e-35	chr8	89057666	89088822	-	NA
ENSMUSG00000071234.4	126.42	-3.16533	0.248491	-12.7382	3.62555e-37	2.422e-35	chr12	84724050	84745605	-	NA
ENSMUSG00000050953.11	671.341	-11.824	0.92861	-12.733	3.87647e-37	2.58286e-35	chr10	56253425	56278609	+	NA
ENSMUSG00000022206.8	97.7922	-4.28803	0.336822	-12.7309	3.98444e-37	2.64789e-35	chr15	11839981	11907373	-	NA
ENSMUSG00000039252.12	126.435	-2.49056	0.195705	-12.7261	4.23239e-37	2.80536e-35	chr5	52690858	52723804	-	NA
ENSMUSG00000048067.9	94.3991	-2.8306	0.222748	-12.7076	5.36649e-37	3.54786e-35	chr7	6516267	6525949	-	NA
ENSMUSG00000028081.7	26613.9	-0.935464	0.073621	-12.7065	5.44301e-37	3.58915e-35	chr3	86045246	86050009	-	NA
ENSMUSG00000022197.17	105.043	-1.85847	0.146575	-12.6793	7.7005e-37	5.06466e-35	chr15	12359796	12740010	-	NA
ENSMUSG00000031575.19	6022.44	-1.03788	0.0819782	-12.6605	9.7903e-37	6.42259e-35	chr8	26306023	26337722	-	NA
ENSMUSG00000029120.11	134.498	3.35999	0.265547	12.6531	1.07547e-36	7.03719e-35	chr5	37025856	37112422	+	NA
ENSMUSG00000100252.8	113.998	-7.71303	0.610228	-12.6396	1.27717e-36	8.33555e-35	chr3	17843891	17863134	+	NA
ENSMUSG00000030519.15	4012.53	1.70512	0.134945	12.6356	1.34342e-36	8.74557e-35	chr7	64151453	64403626	+	NA
ENSMUSG00000021508.12	105.513	-7.37767	0.584111	-12.6306	1.43178e-36	9.29713e-35	chr13	56436455	56444364	-	NA
ENSMUSG00000022346.18	17841.7	2.06774	0.163728	12.6291	1.45853e-36	9.44678e-35	chr15	61857239	61862223	+	NA
ENSMUSG00000031807.11	3325.61	-0.982089	0.0778121	-12.6213	1.61173e-36	1.04126e-34	chr8	72044819	72053736	+	NA
ENSMUSG00000052423.16	1478.32	0.835637	0.0662223	12.6187	1.66642e-36	1.07387e-34	chr1	171097897	171104469	+	NA
ENSMUSG00000031820.10	3382.86	-0.808532	0.0640821	-12.6171	1.6988e-36	1.09198e-34	chr8	71849504	71857263	+	NA
ENSMUSG00000029094.13	1311.28	2.46265	0.195404	12.6029	2.0353e-36	1.30499e-34	chr5	36050662	36161267	+	NA
ENSMUSG00000016933.18	5264.45	0.853826	0.0677837	12.5963	2.21185e-36	1.41464e-34	chr2	160573219	160617680	+	NA
ENSMUSG00000041794.14	73.0245	-2.79711	0.222207	-12.5879	2.46195e-36	1.57066e-34	chr9	120130578	120303907	+	NA
ENSMUSG00000040387.17	239.454	-1.62768	0.129343	-12.5843	2.57763e-36	1.64036e-34	chr4	24612553	24851124	-	NA
ENSMUSG00000112808.2	721.107	-1.74215	0.138604	-12.5693	3.11386e-36	1.97668e-34	chr10	25983686	25984319	+	NA
ENSMUSG00000000296.9	58.8854	-4.77755	0.380545	-12.5545	3.75575e-36	2.37824e-34	chr10	31208371	31321954	-	NA
ENSMUSG00000015994.11	2927.65	-0.911869	0.0726551	-12.5507	3.9424e-36	2.49025e-34	chr8	26488749	26505678	-	NA
ENSMUSG00000047710.9	3422.88	-0.758206	0.0604126	-12.5505	3.95229e-36	2.49033e-34	chr8	13919640	13931639	+	NA
ENSMUSG00000027668.14	4174.01	-1.00023	0.0797818	-12.5371	4.67806e-36	2.94038e-34	chr3	32583613	32633388	+	NA
ENSMUSG00000040557.15	437.521	1.3578	0.108513	12.5128	6.35738e-36	3.98609e-34	chr5	134961221	134971491	+	NA
ENSMUSG00000038416.16	5969.31	-1.15999	0.0927657	-12.5045	7.0529e-36	4.41135e-34	chr8	13807675	13831938	+	NA
ENSMUSG00000038736.11	1320.07	-1.48006	0.118428	-12.4976	7.69751e-36	4.80276e-34	chr15	44236558	44291703	-	NA
ENSMUSG00000083282.4	937.886	1.96249	0.157126	12.4899	8.47419e-36	5.27446e-34	chr19	4905157	4910946	+	NA
ENSMUSG00000004667.19	2553.2	-0.869252	0.0696219	-12.4853	8.97691e-36	5.57377e-34	chr10	79871782	79875629	-	NA
ENSMUSG00000044337.6	257.191	-2.97614	0.238418	-12.4829	9.25512e-36	5.73256e-34	chr1	90131701	90144473	+	NA
ENSMUSG00000056870.10	235.068	-11.4593	0.919554	-12.4618	1.20583e-35	7.45077e-34	chr1	44590670	44835998	+	NA
ENSMUSG00000032060.11	158.947	2.87715	0.231125	12.4485	1.42536e-35	8.78596e-34	chr9	50662624	50667936	+	NA
ENSMUSG00000035131.15	913.134	-3.22211	0.258953	-12.4428	1.53012e-35	9.40894e-34	chr1	146370497	146778210	+	NA
ENSMUSG00000037624.17	435.547	-5.04442	0.40552	-12.4394	1.59757e-35	9.80008e-34	chr1	188940126	189134470	-	NA
ENSMUSG00000005054.8	235.892	9.10868	0.732982	12.4269	1.86806e-35	1.14319e-33	chr10	78261502	78263456	+	NA
ENSMUSG00000030093.8	1963.59	-1.76228	0.141864	-12.4223	1.97749e-35	1.20726e-33	chr6	91340962	91388345	-	NA
ENSMUSG00000019907.11	6794.14	-0.733882	0.0591903	-12.3987	2.65608e-35	1.61768e-33	chr10	107998053	108120336	+	NA
ENSMUSG00000031897.10	870.59	-1.08458	0.0875138	-12.3932	2.84322e-35	1.72753e-33	chr8	106662366	106665076	-	NA
ENSMUSG00000037664.14	81.3736	5.64184	0.455295	12.3916	2.90095e-35	1.75842e-33	chr7	143012075	143014787	-	NA
ENSMUSG00000070044.16	1960.32	-1.22398	0.0988202	-12.3859	3.11616e-35	1.88439e-33	chr8	45789753	45835328	-	NA
ENSMUSG00000078670.4	1818.61	1.32316	0.106948	12.372	3.70392e-35	2.23452e-33	chr7	73390049	73426667	+	NA
ENSMUSG00000022205.16	5598.31	-0.935068	0.0756413	-12.3619	4.20232e-35	2.52922e-33	chr15	11981424	11997069	-	NA
ENSMUSG00000031543.19	223.433	-2.15991	0.174848	-12.353	4.69123e-35	2.81683e-33	chr8	23464859	23640513	+	NA
ENSMUSG00000035283.6	1430.29	-1.55821	0.126179	-12.3492	4.92283e-35	2.94896e-33	chr19	56710630	56721545	+	NA
ENSMUSG00000038319.15	822.533	1.59264	0.129176	12.3293	6.30266e-35	3.76669e-33	chr5	24524586	24556602	-	NA
ENSMUSG00000112823.2	53.3517	-3.42022	0.277524	-12.3241	6.72149e-35	4.00761e-33	chr12	44665973	44669445	-	NA
ENSMUSG00000032802.9	1021.86	1.82725	0.148289	12.3222	6.87933e-35	4.09216e-33	chr2	151947435	151953296	+	NA
ENSMUSG00000037370.14	224.758	-1.85697	0.150775	-12.3161	7.41639e-35	4.40137e-33	chr10	24513811	24588057	-	NA
ENSMUSG00000040907.16	810.715	1.39341	0.113348	12.2932	9.85117e-35	5.83276e-33	chr7	24677591	24705383	-	NA
ENSMUSG00000022965.9	742.814	0.949489	0.0773181	12.2803	1.15574e-34	6.82715e-33	chr16	91343959	91362511	+	NA
ENSMUSG00000039057.12	1788.04	-1.56441	0.127419	-12.2776	1.19459e-34	7.04033e-33	chr8	10203910	10684742	+	NA
ENSMUSG00000005469.11	4272.9	-1.13517	0.092478	-12.275	1.23395e-34	7.25554e-33	chr8	84699621	84723072	+	NA
ENSMUSG00000009630.11	4464.58	-1.03363	0.0842178	-12.2733	1.25995e-34	7.37444e-33	chr8	34089652	34109469	+	NA
ENSMUSG00000001300.17	553.252	-2.1056	0.171558	-12.2734	1.25837e-34	7.37444e-33	chr8	8667433	8711242	-	NA
ENSMUSG00000053129.6	470.993	-1.54037	0.125558	-12.2682	1.34199e-34	7.83664e-33	chr5	147125505	147127757	+	NA
ENSMUSG00000020088.11	6486.51	-0.80398	0.0655421	-12.2666	1.36855e-34	7.97354e-33	chr10	61516077	61529076	+	NA
ENSMUSG00000095332.3	269.788	2.1891	0.178496	12.2641	1.41129e-34	8.20381e-33	chr2	91776047	91779033	+	NA
ENSMUSG00000038250.10	1598.9	-0.86804	0.0707827	-12.2634	1.4231e-34	8.25364e-33	chr8	81707361	81741557	-	NA
ENSMUSG00000031848.16	5534.98	-1.25245	0.102131	-12.2632	1.42809e-34	8.26381e-33	chr8	71125897	71131402	+	NA
ENSMUSG00000032076.21	2734.32	1.0865	0.0886107	12.2615	1.4582e-34	8.41895e-33	chr9	47441470	47769413	+	NA
ENSMUSG00000032375.16	473.029	1.23399	0.100915	12.228	2.20238e-34	1.26868e-32	chr9	66682483	66702772	-	NA
ENSMUSG00000038398.9	2806.93	-0.929773	0.0760643	-12.2235	2.3281e-34	1.33808e-32	chr8	13835614	13849193	+	NA
ENSMUSG00000022747.18	394.128	-3.06072	0.250442	-12.2213	2.39336e-34	1.3725e-32	chr16	58288487	58344606	-	NA
ENSMUSG00000002948.20	1985.8	-0.791202	0.06486	-12.1986	3.16159e-34	1.80898e-32	chr8	4288739	4297897	+	NA
ENSMUSG00000016664.17	2640.83	-0.733347	0.0601724	-12.1874	3.62677e-34	2.0705e-32	chr15	83259807	83348807	-	NA
ENSMUSG00000043857.17	78.927	-2.60731	0.214025	-12.1823	3.86411e-34	2.20107e-32	chr11	116809688	116877774	+	NA
ENSMUSG00000030283.8	1035.47	-1.09368	0.0899715	-12.1558	5.34036e-34	3.03521e-32	chr6	142767270	142910178	-	NA
ENSMUSG00000022799.5	3065.84	-0.803118	0.0661007	-12.1499	5.74213e-34	3.2563e-32	chr16	38418701	38533636	-	NA
ENSMUSG00000067818.7	127.885	3.637	0.300064	12.1207	8.20114e-34	4.64046e-32	chr2	156617339	156623578	+	NA
ENSMUSG00000059742.11	318.33	3.11138	0.256745	12.1186	8.41998e-34	4.75375e-32	chr2	62523757	63014631	-	NA
ENSMUSG00000004665.11	1724.45	-1.33563	0.110282	-12.111	9.23122e-34	5.20026e-32	chr10	79824417	79831896	+	NA
ENSMUSG00000048347.6	291.538	1.49512	0.123461	12.1101	9.3428e-34	5.25152e-32	chr18	37622517	37627558	+	NA
ENSMUSG00000021567.16	48.1679	-3.47058	0.286853	-12.0988	1.07156e-33	6.00995e-32	chr13	73966652	73995750	-	NA
ENSMUSG00000013033.17	4971.7	-0.759218	0.0628201	-12.0856	1.25863e-33	7.04365e-32	chr8	84626733	84668583	+	NA
ENSMUSG00000074264.13	354.01	2.59458	0.214966	12.0697	1.52666e-33	8.52493e-32	chr3	113349358	113400348	-	NA
ENSMUSG00000079157.5	190.954	-11.1606	0.925625	-12.0574	1.77329e-33	9.88048e-32	chr8	9255901	9821161	-	NA
ENSMUSG00000068373.16	376.225	2.36041	0.195789	12.0559	1.80613e-33	1.00415e-31	chr2	103973417	104241358	-	NA
ENSMUSG00000023885.10	893.736	5.37731	0.446118	12.0536	1.85745e-33	1.03044e-31	chr17	14885761	14914497	-	NA
ENSMUSG00000036943.10	3859.44	-0.83634	0.0693926	-12.0523	1.88641e-33	1.04424e-31	chr9	66750945	66826969	-	NA
ENSMUSG00000087651.4	130.078	-3.44126	0.285674	-12.0461	2.03401e-33	1.1235e-31	chr10	83558728	83598626	+	NA
ENSMUSG00000031540.15	13766	-1.07408	0.0892532	-12.0341	2.3518e-33	1.29624e-31	chr8	23349550	23433275	+	NA
ENSMUSG00000090394.9	68.6373	-4.01339	0.333514	-12.0337	2.3647e-33	1.30053e-31	chr1	159871951	159907778	+	NA
ENSMUSG00000096255.3	1500.72	-1.00719	0.083896	-12.0053	3.3341e-33	1.82974e-31	chr17	6697510	6703695	+	NA
ENSMUSG00000031715.15	9375.64	-0.999456	0.0832797	-12.0012	3.50194e-33	1.91773e-31	chr8	81425135	81466126	-	NA
ENSMUSG00000005803.15	73.1844	-2.61615	0.218249	-11.987	4.15754e-33	2.27187e-31	chr2	122607156	122651489	+	NA
ENSMUSG00000026141.14	51.3852	-5.54985	0.463413	-11.976	4.74484e-33	2.58413e-31	chr1	24300970	24626553	-	NA
ENSMUSG00000105263.2	286.775	-11.17	0.9327	-11.976	4.74924e-33	2.58413e-31	chr5	44295321	44300613	+	NA
ENSMUSG00000092274.5	3192.03	2.43643	0.203514	11.9718	4.99377e-33	2.71141e-31	chr19	5874735	5895898	-	NA
ENSMUSG00000003808.19	3999.37	-1.16825	0.0976191	-11.9675	5.26041e-33	2.85012e-31	chr8	85583617	85595886	+	NA
ENSMUSG00000078302.6	269.235	-11.0786	0.925789	-11.9666	5.31431e-33	2.87322e-31	chr13	98490749	98495813	+	NA
ENSMUSG00000026944.19	3179.98	1.15869	0.0968897	11.9588	5.83965e-33	3.15057e-31	chr2	25318714	25338552	+	NA
ENSMUSG00000026042.17	384.267	-11.018	0.923272	-11.9336	7.90698e-33	4.25692e-31	chr1	45413480	45542442	-	NA
ENSMUSG00000059327.10	306.149	2.79362	0.234117	11.9326	8.00391e-33	4.30004e-31	chrX	99019211	99444368	+	NA
ENSMUSG00000021728.9	78.0227	-2.13887	0.17946	-11.9183	9.49953e-33	5.09283e-31	chr13	117345071	117410951	+	NA
ENSMUSG00000097452.3	141.206	2.92336	0.245506	11.9075	1.08184e-32	5.78776e-31	chr15	24981705	25027444	-	NA
ENSMUSG00000019872.14	882.753	-1.50176	0.126457	-11.8757	1.58332e-32	8.45286e-31	chr10	57670430	57687926	+	NA
ENSMUSG00000078307.4	61.6757	-6.22056	0.523955	-11.8723	1.64875e-32	8.78379e-31	chr9	52584341	52591080	-	NA
ENSMUSG00000031864.17	3128.51	-0.895715	0.0754774	-11.8673	1.74983e-32	9.30291e-31	chr8	69246580	69284319	+	NA
ENSMUSG00000031557.17	1505.88	-1.78748	0.150641	-11.8658	1.78171e-32	9.45271e-31	chr8	25529159	25592392	-	NA
ENSMUSG00000031731.17	3826.79	-0.756598	0.0637955	-11.8597	1.91564e-32	1.01421e-30	chr8	110505185	110590836	+	NA
ENSMUSG00000120241.1	424.048	1.08364	0.0914486	11.8498	2.15832e-32	1.14034e-30	chr5	30428091	30437398	-	NA
ENSMUSG00000019039.15	1132.51	1.08519	0.0916457	11.8412	2.39099e-32	1.26066e-30	chr9	108447084	108449973	+	NA
ENSMUSG00000042210.19	423.621	-1.70529	0.144273	-11.8199	3.08105e-32	1.62114e-30	chr9	106317252	106324877	-	NA
ENSMUSG00000037366.15	636.279	-1.10099	0.0931966	-11.8136	3.32125e-32	1.74393e-30	chr4	134123630	134154724	+	NA
ENSMUSG00000038507.7	217.811	-2.67005	0.226032	-11.8127	3.35517e-32	1.75812e-30	chr6	39063343	39095283	-	NA
ENSMUSG00000079259.3	350.107	1.82938	0.154957	11.8058	3.64506e-32	1.90611e-30	chr9	114336200	114393437	-	NA
ENSMUSG00000034156.17	103.472	3.64193	0.308744	11.796	4.09521e-32	2.13713e-30	chr11	87651366	87676754	+	NA
ENSMUSG00000024044.20	129.747	-7.66634	0.650072	-11.7931	4.23905e-32	2.20768e-30	chr17	69382677	69596984	+	NA
ENSMUSG00000037206.16	92.8171	-2.73392	0.232084	-11.7799	4.95544e-32	2.57552e-30	chr9	58063550	58111589	-	NA
ENSMUSG00000074513.10	295.521	-1.27803	0.10853	-11.7758	5.20007e-32	2.69717e-30	chr3	84403399	84489932	-	NA
ENSMUSG00000006782.17	9107.64	2.65873	0.225855	11.7718	5.45308e-32	2.81694e-30	chr11	100465729	100482555	+	NA
ENSMUSG00000053475.6	689.498	-1.61102	0.136852	-11.772	5.4423e-32	2.81694e-30	chr2	51928020	51946698	+	NA
ENSMUSG00000013367.6	382.003	-1.61924	0.137746	-11.7552	6.6386e-32	3.42243e-30	chr7	43122327	43139499	-	NA
ENSMUSG00000027833.17	610.709	-0.955566	0.0812919	-11.7547	6.67599e-32	3.43471e-30	chr3	66879059	66889104	-	NA
ENSMUSG00000045532.6	52.8927	-3.55057	0.302059	-11.7546	6.68933e-32	3.43471e-30	chr11	102830089	102837514	-	NA
ENSMUSG00000033099.11	1635.58	-0.915002	0.077866	-11.751	6.9805e-32	3.57702e-30	chr15	78819132	78827838	+	NA
ENSMUSG00000045761.17	123.804	2.23052	0.189925	11.7443	7.55868e-32	3.86553e-30	chr17	71980255	72036664	+	NA
ENSMUSG00000007872.4	2438.32	-2.22559	0.189815	-11.725	9.48679e-32	4.84187e-30	chr4	135870807	135873066	+	NA
ENSMUSG00000034384.12	54.104	-3.05347	0.260481	-11.7224	9.7804e-32	4.98176e-30	chr5	106600388	106606032	-	NA
ENSMUSG00000012519.15	267.104	-9.94054	0.848435	-11.7163	1.05138e-31	5.34464e-30	chr8	112038428	112064809	-	NA
ENSMUSG00000032890.18	91.5512	-6.97237	0.595511	-11.7082	1.15707e-31	5.87023e-30	chr4	120712012	120753776	+	NA
ENSMUSG00000031283.17	1027.38	-2.4422	0.208665	-11.704	1.21635e-31	6.15876e-30	chrX	142068669	142177258	-	NA
ENSMUSG00000038633.6	2509.25	0.919402	0.0786191	11.6944	1.3617e-31	6.88104e-30	chr1	182103336	182110369	-	NA
ENSMUSG00000030703.9	177.175	-2.41818	0.206841	-11.691	1.41696e-31	7.14613e-30	chr7	126365505	126374821	+	NA
ENSMUSG00000000881.13	488.215	-1.77478	0.151861	-11.6869	1.48721e-31	7.48564e-30	chrX	99811327	99862016	+	NA
ENSMUSG00000045969.9	3840.36	-0.928673	0.0795137	-11.6794	1.62433e-31	8.15971e-30	chr8	11605570	11613251	+	NA
ENSMUSG00000020415.17	1503.59	-1.68552	0.144399	-11.6726	1.75918e-31	8.81973e-30	chr11	43311076	43317078	-	NA
ENSMUSG00000047910.7	685.376	1.16456	0.0997974	11.6693	1.82951e-31	9.15437e-30	chr18	37610866	37616091	+	NA
ENSMUSG00000060675.14	229.737	-1.38798	0.11898	-11.6657	1.90886e-31	9.53274e-30	chr19	7534823	7565910	+	NA
ENSMUSG00000098134.2	210.054	2.17791	0.186715	11.6643	1.93881e-31	9.66336e-30	chr12	84463969	84465352	+	NA
ENSMUSG00000025232.9	3246.56	1.34698	0.115501	11.662	1.99226e-31	9.91043e-30	chr9	59446822	59472392	+	NA
ENSMUSG00000036225.16	1142.04	-1.02207	0.0876583	-11.6597	2.04765e-31	1.01662e-29	chr18	15101741	15284503	-	NA
ENSMUSG00000110720.2	298.752	-10.1019	0.867307	-11.6474	2.36493e-31	1.17186e-29	chr10	50298229	50298904	-	NA
ENSMUSG00000022518.17	124.806	2.32337	0.199538	11.6437	2.46938e-31	1.22124e-29	chr16	4653279	4685550	+	NA
ENSMUSG00000025176.15	58.3998	5.90947	0.507549	11.6432	2.48642e-31	1.22729e-29	chr19	42034048	42059392	+	NA
ENSMUSG00000026893.5	112.255	-2.43821	0.209423	-11.6425	2.50549e-31	1.23194e-29	chr2	62494628	62524453	+	NA
ENSMUSG00000042195.10	151.653	-10.8338	0.930527	-11.6427	2.50086e-31	1.23194e-29	chr9	53678821	53725438	+	NA
ENSMUSG00000031479.10	2954.33	-1.03168	0.0887238	-11.628	2.96836e-31	1.45672e-29	chr8	22682824	22710859	+	NA
ENSMUSG00000010175.14	3199.79	1.19032	0.102424	11.6215	3.20477e-31	1.56972e-29	chr1	189850231	189902911	-	NA
ENSMUSG00000060376.8	546.623	1.30676	0.112625	11.6028	3.98972e-31	1.95045e-29	chr7	25329370	25358406	-	NA
ENSMUSG00000021477.10	4425.8	1.1788	0.101639	11.5979	4.22244e-31	2.06027e-29	chr13	64507150	64518704	-	NA
ENSMUSG00000025154.16	2130.22	-1.17842	0.101612	-11.5972	4.25832e-31	2.07382e-29	chr19	41755026	41790486	-	NA
ENSMUSG00000037541.23	332.077	-1.86345	0.160807	-11.5881	4.73291e-31	2.30056e-29	chr7	143555664	143978231	+	NA
ENSMUSG00000054942.14	216.457	-2.94377	0.254087	-11.5857	4.87083e-31	2.36309e-29	chr3	151979485	152046044	-	NA
ENSMUSG00000020895.15	415.13	-1.68196	0.145264	-11.5786	5.28967e-31	2.56142e-29	chr11	68961631	68964119	+	NA
ENSMUSG00000033618.8	413.28	-1.16396	0.100578	-11.5727	5.6653e-31	2.73812e-29	chr16	21613095	21752189	+	NA
ENSMUSG00000072476.7	54.9345	-6.23407	0.538817	-11.5699	5.85371e-31	2.82383e-29	chr6	76472414	76474767	-	NA
ENSMUSG00000031239.6	284.372	11.4647	0.991655	11.5612	6.48163e-31	3.12084e-29	chrX	106440704	106446982	-	NA
ENSMUSG00000075053.4	1195.92	-1.27998	0.110725	-11.56	6.5716e-31	3.1582e-29	chr13	18205325	18206178	-	NA
ENSMUSG00000037225.14	68.0374	-2.67115	0.231308	-11.548	7.55293e-31	3.62299e-29	chr3	37402494	37464257	+	NA
ENSMUSG00000043991.6	2692.68	0.913575	0.0791333	11.5448	7.84549e-31	3.75627e-29	chr18	36414149	36425588	+	NA
ENSMUSG00000032796.9	180.478	-8.96561	0.776617	-11.5444	7.87483e-31	3.76325e-29	chr17	68004253	68129642	+	NA
ENSMUSG00000090919.7	49.7797	-3.05257	0.264779	-11.5287	9.45297e-31	4.50898e-29	chr3	46396631	46402654	-	NA
ENSMUSG00000008999.8	588.244	-11.633	1.00922	-11.5267	9.67721e-31	4.60733e-29	chr2	172709804	172782114	-	NA
ENSMUSG00000040111.18	1353.28	1.11877	0.0970613	11.5265	9.70501e-31	4.61196e-29	chr9	40204528	40442679	-	NA
ENSMUSG00000103034.2	222.415	-2.28828	0.198538	-11.5257	9.79253e-31	4.6449e-29	chr3	5815865	5816355	+	NA
ENSMUSG00000035559.10	1587.92	-0.830181	0.0720623	-11.5203	1.04217e-30	4.93418e-29	chr8	71211294	71213592	-	NA
ENSMUSG00000034518.15	1599.29	-1.01637	0.0882509	-11.5168	1.08599e-30	5.1321e-29	chr8	75719983	75758606	+	NA
ENSMUSG00000008892.13	7503.01	-1.31228	0.113981	-11.5131	1.13378e-30	5.34803e-29	chr8	23067090	23083829	-	NA
ENSMUSG00000078653.5	170.319	2.53022	0.219838	11.5095	1.18212e-30	5.56579e-29	chr11	101169837	101187143	+	NA
ENSMUSG00000038774.10	1318.44	-1.22309	0.106315	-11.5044	1.25334e-30	5.89025e-29	chr10	50468764	50727581	+	NA
ENSMUSG00000050550.8	54.5934	-6.20607	0.539646	-11.5003	1.31515e-30	6.16937e-29	chr4	18844201	18845679	-	NA
ENSMUSG00000099342.2	46.7329	-2.88524	0.251165	-11.4874	1.52555e-30	7.14323e-29	chr1	85942124	85943608	-	NA
ENSMUSG00000104148.6	45.7846	-4.08369	0.355594	-11.4841	1.58528e-30	7.4093e-29	chr18	37072257	37320710	+	NA
ENSMUSG00000028572.14	470.032	-2.64899	0.230727	-11.481	1.64305e-30	7.66525e-29	chr4	95855476	95913650	+	NA
ENSMUSG00000038069.7	847.374	-0.883362	0.0770005	-11.4722	1.82077e-30	8.47887e-29	chr8	48162378	48166967	-	NA
ENSMUSG00000020484.20	2502.28	-0.920039	0.0802864	-11.4595	2.10808e-30	9.79891e-29	chr11	5470658	5475893	+	NA
ENSMUSG00000028488.16	526.679	-1.13118	0.0987189	-11.4586	2.12835e-30	9.87514e-29	chr4	85123362	85557432	+	NA
ENSMUSG00000021313.17	39.9378	-3.99453	0.348912	-11.4485	2.39166e-30	1.10767e-28	chr13	11567987	12121831	-	NA
ENSMUSG00000026586.17	305.642	-5.95599	0.520356	-11.446	2.46278e-30	1.13855e-28	chr1	163072687	163141279	-	NA
ENSMUSG00000046160.7	37980.9	1.11952	0.0979116	11.434	2.82692e-30	1.30452e-28	chr16	91066659	91068821	+	NA
ENSMUSG00000041750.15	80.176	6.96566	0.609218	11.4338	2.83512e-30	1.30594e-28	chr3	86893857	86897087	+	NA
ENSMUSG00000006154.14	125.793	-2.20154	0.192679	-11.426	3.1018e-30	1.42621e-28	chr7	4463672	4483486	+	NA
ENSMUSG00000035226.6	607.438	2.14017	0.187832	11.3941	4.47647e-30	2.05459e-28	chr2	163701670	163760603	-	NA
ENSMUSG00000019362.9	3327.09	-0.937703	0.0823884	-11.3815	5.17035e-30	2.3688e-28	chr8	84972866	84976348	-	NA
ENSMUSG00000038005.16	3078.3	-1.28666	0.113068	-11.3795	5.28871e-30	2.41868e-28	chr8	61343451	61361705	+	NA
ENSMUSG00000038065.14	401.86	2.20709	0.1941	11.3709	5.83797e-30	2.6651e-28	chr6	54658608	54680836	+	NA
ENSMUSG00000025612.6	2245.82	1.07065	0.0941721	11.3691	5.96009e-30	2.71599e-28	chr16	87495832	87530234	+	NA
ENSMUSG00000040852.7	1964.04	1.38734	0.122117	11.3607	6.56037e-30	2.98421e-28	chr17	84819322	84929566	+	NA
ENSMUSG00000003813.16	3099.45	-1.04724	0.0922462	-11.3527	7.19198e-30	3.2657e-28	chr8	85560647	85567294	-	NA
ENSMUSG00000102748.2	182.534	2.85872	0.251842	11.3513	7.30875e-30	3.31283e-28	chr18	37822880	37974926	+	NA
ENSMUSG00000026956.16	745.905	1.30157	0.114922	11.3256	9.79641e-30	4.43253e-28	chr2	25249900	25255694	-	NA
ENSMUSG00000020133.9	1494.91	-0.665155	0.0587447	-11.3228	1.01176e-29	4.56975e-28	chr10	80154087	80156371	-	NA
ENSMUSG00000042436.13	120.228	1.87235	0.165474	11.315	1.10569e-29	4.98518e-28	chr11	61376256	61379726	+	NA
ENSMUSG00000034990.16	52.2726	3.67567	0.325296	11.2995	1.3201e-29	5.94137e-28	chr7	120680872	120762320	+	NA
ENSMUSG00000046636.6	225.324	-1.48827	0.131751	-11.2961	1.37125e-29	6.16074e-28	chr18	27731696	27732809	+	NA
ENSMUSG00000033998.10	208.523	-10.7149	0.948832	-11.2928	1.4248e-29	6.39006e-28	chr8	126721908	126757424	+	NA
ENSMUSG00000019854.18	2264.17	-0.876268	0.0776305	-11.2877	1.50986e-29	6.75966e-28	chr10	17931608	18000903	+	NA
ENSMUSG00000034330.11	40.5106	-4.67284	0.414275	-11.2796	1.65587e-29	7.40038e-28	chr8	118225029	118361881	+	NA
ENSMUSG00000093606.3	180.154	1.68199	0.14926	11.2689	1.86898e-29	8.33819e-28	chr16	87292822	87309969	+	NA
ENSMUSG00000074252.3	43.9225	4.84067	0.430112	11.2544	2.20246e-29	9.80882e-28	chr8	71384048	71385681	+	NA
ENSMUSG00000040187.16	168.098	-2.54739	0.226493	-11.2471	2.39396e-29	1.06431e-27	chr6	146697552	146735027	+	NA
ENSMUSG00000004347.18	337.599	2.40625	0.214072	11.2404	2.58282e-29	1.14628e-27	chr6	56046788	56629472	-	NA
ENSMUSG00000104435.2	415.852	1.34588	0.119766	11.2375	2.66723e-29	1.18169e-27	chr1	189612131	189616849	+	NA
ENSMUSG00000031610.4	961.573	-1.34903	0.120209	-11.2224	3.16639e-29	1.4004e-27	chr8	57908956	57930619	+	NA
ENSMUSG00000062397.9	6346.17	-0.916924	0.0817594	-11.2149	3.44554e-29	1.52122e-27	chr15	36997270	37008017	-	NA
ENSMUSG00000024892.18	3707.69	-1.09118	0.0973597	-11.2077	3.73613e-29	1.64667e-27	chr19	4560499	4671780	+	NA
ENSMUSG00000037990.19	377.417	-1.71332	0.152946	-11.2021	3.97996e-29	1.75111e-27	chr10	58649180	58974738	+	NA
ENSMUSG00000121513.1	4129.9	-0.746479	0.0666557	-11.199	4.12296e-29	1.81091e-27	chr14	10227721	10916220	-	NA
ENSMUSG00000021938.13	1969.13	-0.964983	0.0861819	-11.1971	4.21513e-29	1.84821e-27	chr14	56958166	57015773	-	NA
ENSMUSG00000021747.13	125.708	-10.5625	0.943505	-11.195	4.31401e-29	1.88832e-27	chr14	13803532	14038581	+	NA
ENSMUSG00000111055.2	265.523	2.21644	0.198054	11.1911	4.50845e-29	1.97005e-27	chr10	39045295	39049248	-	NA
ENSMUSG00000109814.2	91.975	1.82317	0.163106	11.1778	5.23542e-29	2.2838e-27	chr7	122630637	122667528	+	NA
ENSMUSG00000054409.6	100.428	-2.90731	0.260164	-11.1749	5.41026e-29	2.35605e-27	chr15	43728041	43733432	-	NA
ENSMUSG00000017721.16	5661.32	0.972267	0.0870121	11.1739	5.47075e-29	2.37833e-27	chr2	164339439	164350221	+	NA
ENSMUSG00000034708.13	5826.4	1.40209	0.12554	11.1685	5.81429e-29	2.52338e-27	chr11	102321140	102327874	+	NA
ENSMUSG00000054408.10	2624.93	-1.47224	0.131957	-11.1569	6.6252e-29	2.87043e-27	chr8	54973467	54983033	-	NA
ENSMUSG00000038486.10	510.836	-1.45155	0.130171	-11.1512	7.06839e-29	3.05726e-27	chr3	96088466	96102837	+	NA
ENSMUSG00000038668.15	51.0511	-3.41227	0.306089	-11.148	7.32701e-29	3.16375e-27	chr4	58435254	58553898	-	NA
ENSMUSG00000031446.15	5385.39	-0.745808	0.0669314	-11.1429	7.75765e-29	3.34405e-27	chr8	13155620	13197940	+	NA
ENSMUSG00000068566.14	525.19	1.99459	0.179018	11.1418	7.84902e-29	3.37773e-27	chr7	3337604	3348958	+	NA
ENSMUSG00000031805.18	241.496	-2.99233	0.26867	-11.1376	8.23403e-29	3.53744e-27	chr8	72128939	72143219	+	NA
ENSMUSG00000031586.18	108.802	-2.09555	0.188161	-11.137	8.28543e-29	3.55354e-27	chr8	34272670	34419891	-	NA
ENSMUSG00000116504.3	100.166	-2.23066	0.200351	-11.1338	8.59369e-29	3.67957e-27	chr15	100628348	100630630	-	NA
ENSMUSG00000021520.5	916.9	-1.39975	0.125886	-11.1192	1.01231e-28	4.32715e-27	chr13	67048680	67053442	-	NA
ENSMUSG00000036972.15	96.0145	-1.94217	0.174828	-11.109	1.13394e-28	4.83895e-27	chr9	91244465	91271401	+	NA
ENSMUSG00000110277.3	189.059	1.82318	0.164366	11.0922	1.36905e-28	5.83254e-27	chr18	90597900	90610652	+	NA
ENSMUSG00000045589.8	1631.39	2.65529	0.239403	11.0913	1.38254e-28	5.88018e-27	chr4	56957172	56990391	-	NA
ENSMUSG00000022054.12	134.964	-10.6602	0.961781	-11.0838	1.50336e-28	6.38341e-27	chr14	68320038	68362295	-	NA
ENSMUSG00000020393.17	6621.85	0.98107	0.0885266	11.0822	1.53059e-28	6.48821e-27	chr11	5141551	5211558	-	NA
ENSMUSG00000031285.15	281.898	2.47769	0.223684	11.0767	1.62719e-28	6.88626e-27	chrX	142638837	142716307	-	NA
ENSMUSG00000039478.16	480.15	-1.0735	0.0970534	-11.061	1.93991e-28	8.19612e-27	chr8	40760498	40839349	+	NA
ENSMUSG00000043219.10	73.8356	-2.75494	0.249103	-11.0594	1.97337e-28	8.3237e-27	chr6	52183267	52185702	-	NA
ENSMUSG00000042594.17	1228.29	1.30068	0.117658	11.0547	2.07926e-28	8.75588e-27	chr5	121953550	121975709	-	NA
ENSMUSG00000037606.19	725.267	2.05104	0.185598	11.051	2.16859e-28	9.117e-27	chr7	143242498	143310722	-	NA
ENSMUSG00000031516.12	2465.26	-0.840532	0.0760921	-11.0462	2.28593e-28	9.5945e-27	chr8	34557573	34575950	-	NA
ENSMUSG00000056938.18	196.432	-2.22889	0.201821	-11.0439	2.34594e-28	9.83023e-27	chr11	102992507	103005229	+	NA
ENSMUSG00000026730.13	160.377	-2.89166	0.261982	-11.0376	2.51625e-28	1.05266e-26	chr2	12928851	13008266	+	NA
ENSMUSG00000032318.13	212.926	1.20606	0.109316	11.0327	2.65632e-28	1.10944e-26	chr9	55445955	55453464	+	NA
ENSMUSG00000031711.8	2978.25	-1.07787	0.0977233	-11.0298	2.74347e-28	1.14397e-26	chr8	83490235	83500789	-	NA
ENSMUSG00000060904.15	4334	-0.816941	0.0741296	-11.0204	3.04561e-28	1.26788e-26	chr10	88566719	88579956	+	NA
ENSMUSG00000029192.18	2071.79	0.815538	0.0740393	11.0149	3.2375e-28	1.34557e-26	chr5	36647947	36750620	-	NA
ENSMUSG00000033855.16	172.842	-9.31039	0.84563	-11.01	3.41973e-28	1.41899e-26	chr17	88905111	88970014	+	NA
ENSMUSG00000015134.16	97.7532	-2.89294	0.262894	-11.0042	3.64798e-28	1.51125e-26	chr7	66040637	66077265	-	NA
ENSMUSG00000058355.9	10492.3	-1.145	0.104172	-10.9915	4.2001e-28	1.73715e-26	chr8	80410090	80438369	-	NA
ENSMUSG00000041607.18	357.153	6.07652	0.553182	10.9847	4.52933e-28	1.87029e-26	chr18	82493270	82603762	+	NA
ENSMUSG00000030056.9	409.214	-1.12721	0.102644	-10.9817	4.68086e-28	1.92974e-26	chr6	87791250	87815780	-	NA
ENSMUSG00000079009.9	56.8288	5.84254	0.532553	10.9708	5.27887e-28	2.17277e-26	chr2	150023674	150035199	+	NA
ENSMUSG00000075470.3	5438.54	-0.788724	0.0718965	-10.9703	5.31112e-28	2.18252e-26	chr15	90108513	90117674	+	NA
ENSMUSG00000029754.14	38.7874	-4.008	0.365553	-10.9642	5.67941e-28	2.33011e-26	chr6	6863333	6868568	+	NA
ENSMUSG00000085389.9	179.221	-1.80603	0.164815	-10.9579	6.08984e-28	2.49449e-26	chr4	129854166	129858931	+	NA
ENSMUSG00000052102.16	1181.5	1.00112	0.0913843	10.9551	6.28022e-28	2.56835e-26	chr18	38460587	38472056	-	NA
ENSMUSG00000064317.6	359.036	-0.999553	0.0912487	-10.9542	6.34629e-28	2.59122e-26	chr10	78229153	78229462	+	NA
ENSMUSG00000016493.14	181.591	2.31091	0.211044	10.9499	6.65278e-28	2.71202e-26	chr1	194719133	194774557	-	NA
ENSMUSG00000040310.13	44.6114	-4.09368	0.374759	-10.9235	8.90028e-28	3.62243e-26	chr2	93472728	93511684	+	NA
ENSMUSG00000004035.13	1081.08	-1.56892	0.143636	-10.9229	8.95905e-28	3.64054e-26	chr3	107833649	107839133	-	NA
ENSMUSG00000038291.17	3050.87	-1.25328	0.114831	-10.9141	9.86848e-28	4.00372e-26	chr8	46486297	46605196	-	NA
ENSMUSG00000031683.17	2745.32	-1.38063	0.126552	-10.9097	1.0364e-27	4.19807e-26	chr8	79531493	79547769	-	NA
ENSMUSG00000027714.12	1255.02	-1.12463	0.103273	-10.8899	1.28814e-27	5.20951e-26	chr3	36606754	36619876	+	NA
ENSMUSG00000022244.8	301.33	-1.25191	0.115003	-10.8859	1.34523e-27	5.43179e-26	chr15	10981841	10996712	+	NA
ENSMUSG00000039943.17	1055.6	-1.14625	0.105343	-10.8811	1.41905e-27	5.72082e-26	chr2	135500930	135856513	+	NA
ENSMUSG00000033102.16	308.736	-1.69807	0.156062	-10.8807	1.42428e-27	5.73285e-26	chr13	64337081	64423104	-	NA
ENSMUSG00000000552.11	1134.28	-1.53874	0.141547	-10.8709	1.58699e-27	6.37771e-26	chr15	103222321	103248520	-	NA
ENSMUSG00000024511.16	39.9358	-2.9637	0.272679	-10.8688	1.62242e-27	6.50984e-26	chr18	70112201	70274676	-	NA
ENSMUSG00000031605.9	1573.62	-1.06975	0.0985505	-10.8548	1.89127e-27	7.57667e-26	chr8	65192708	65302669	-	NA
ENSMUSG00000049866.13	3783.86	1.05686	0.0973666	10.8544	1.90069e-27	7.60248e-26	chr1	88600846	88629943	-	NA
ENSMUSG00000026304.14	603.624	2.18154	0.201006	10.8531	1.928e-27	7.69964e-26	chr1	90885854	90897383	-	NA
ENSMUSG00000005968.15	47.6096	-6.20753	0.572006	-10.8522	1.94645e-27	7.76118e-26	chr3	94520063	94566179	-	NA
ENSMUSG00000040253.16	330.541	-2.88123	0.265552	-10.8499	1.99535e-27	7.94374e-26	chr3	142236102	142255910	+	NA
ENSMUSG00000041734.16	884.26	-1.87403	0.172858	-10.8415	2.18941e-27	8.70272e-26	chr3	86985899	87082054	-	NA
ENSMUSG00000055817.19	1032.73	-0.930413	0.0859312	-10.8274	2.55252e-27	1.01303e-25	chr17	84013591	84128945	+	NA
ENSMUSG00000021464.16	125.349	-9.97628	0.92175	-10.8232	2.67282e-27	1.05913e-25	chr13	53263347	53440160	-	NA
ENSMUSG00000048758.15	7257.21	-0.833541	0.0770264	-10.8215	2.72282e-27	1.07726e-25	chr9	106306652	106308767	+	NA
ENSMUSG00000112640.2	32.9793	-3.97104	0.367101	-10.8173	2.85052e-27	1.12604e-25	chr10	81699767	81716915	+	NA
ENSMUSG00000039519.7	46.7008	-6.19296	0.572522	-10.817	2.86092e-27	1.1284e-25	chr3	18126113	18297502	-	NA
ENSMUSG00000109244.2	85.8468	-10.018	0.926367	-10.8143	2.94585e-27	1.16011e-25	chr7	87960685	87965072	+	NA
ENSMUSG00000039116.8	1036.82	-1.32859	0.122892	-10.811	3.05314e-27	1.20051e-25	chr10	14278326	14421403	-	NA
ENSMUSG00000000031.19	47.8106	4.76503	0.441106	10.8025	3.3507e-27	1.31548e-25	chr7	142129261	142131917	-	NA
ENSMUSG00000003814.9	25022.1	-1.60294	0.14845	-10.7979	3.52352e-27	1.38121e-25	chr8	85568478	85573563	-	NA
ENSMUSG00000074194.5	37.8	-3.7905	0.35166	-10.7789	4.33121e-27	1.69522e-25	chr8	85835181	85849724	-	NA
ENSMUSG00000089889.4	116.912	1.61118	0.149552	10.7734	4.59808e-27	1.79691e-25	chr5	143315001	143318459	+	NA
ENSMUSG00000015889.9	4060.12	-0.725631	0.0673646	-10.7717	4.68234e-27	1.82704e-25	chr10	93289272	93320737	+	NA
ENSMUSG00000058656.14	332.673	-2.46931	0.229292	-10.7693	4.80565e-27	1.87229e-25	chr15	53317205	53765933	-	NA
ENSMUSG00000021189.12	1283.1	1.01641	0.0943832	10.7689	4.82476e-27	1.87688e-25	chr12	101885159	101924505	-	NA
ENSMUSG00000027580.18	151.482	-2.66604	0.247599	-10.7676	4.89657e-27	1.90191e-25	chr2	180869407	180883820	-	NA
ENSMUSG00000095180.11	172.392	3.32353	0.308851	10.7609	5.26358e-27	2.04136e-25	chrX	36891635	36897311	+	NA
ENSMUSG00000045248.7	956.88	-0.941123	0.0875165	-10.7537	5.69544e-27	2.20549e-25	chr8	73248404	73302114	-	NA
ENSMUSG00000035799.7	762.52	1.87893	0.174828	10.7473	6.10161e-27	2.3592e-25	chr12	34007669	34009828	+	NA
ENSMUSG00000026600.13	2578.04	0.701456	0.0652895	10.7438	6.33918e-27	2.44735e-25	chr1	156252094	156301901	-	NA
ENSMUSG00000096937.2	36.228	-3.57031	0.332649	-10.7329	7.12876e-27	2.74802e-25	chr10	22278781	22283369	+	NA
ENSMUSG00000021190.15	3106.19	1.88483	0.17568	10.7288	7.45751e-27	2.87041e-25	chr12	102360342	102406072	-	NA
ENSMUSG00000032218.8	1271	2.84302	0.265007	10.7281	7.51433e-27	2.88793e-25	chr9	70314973	70328829	-	NA
ENSMUSG00000009356.13	204.691	1.54091	0.143638	10.7278	7.53979e-27	2.89335e-25	chr11	87697253	87719115	-	NA
ENSMUSG00000017978.19	170.816	-9.85177	0.919284	-10.7168	8.49074e-27	3.25338e-25	chr6	23262771	23839420	-	NA
ENSMUSG00000033569.18	1343.55	-0.687718	0.0642155	-10.7095	9.1814e-27	3.51275e-25	chr1	25106556	25868788	-	NA
ENSMUSG00000006522.18	179.089	2.33502	0.218038	10.7093	9.2087e-27	3.51792e-25	chr14	30630528	30645717	-	NA
ENSMUSG00000031604.11	6138.17	-1.51555	0.141563	-10.7058	9.56177e-27	3.64733e-25	chr8	65171172	65186826	-	NA
ENSMUSG00000020132.11	2806.12	-0.636608	0.0594923	-10.7007	1.01042e-26	3.8485e-25	chr10	115122988	115151499	-	NA
ENSMUSG00000061119.8	1137.11	1.23518	0.11575	10.6712	1.38886e-26	5.28201e-25	chr7	92523677	92583791	+	NA
ENSMUSG00000023830.15	3176	1.39501	0.130855	10.6608	1.55328e-26	5.89854e-25	chr17	12901292	12988551	-	NA
ENSMUSG00000074813.16	54.9703	3.06753	0.287748	10.6605	1.558e-26	5.90766e-25	chr2	128020238	128344685	-	NA
ENSMUSG00000039470.16	1203.75	-1.61905	0.151954	-10.6548	1.6553e-26	6.26729e-25	chr8	40876855	40963309	+	NA
ENSMUSG00000024875.6	900.686	-0.890741	0.0836047	-10.6542	1.66672e-26	6.30118e-25	chr19	5138565	5142909	+	NA
ENSMUSG00000031617.17	2658.86	-0.922919	0.0866615	-10.6497	1.74932e-26	6.6037e-25	chr8	78322610	78337327	-	NA
ENSMUSG00000032172.9	3306.24	-1.66057	0.156044	-10.6416	1.90734e-26	7.18956e-25	chr9	20578985	20657645	-	NA
ENSMUSG00000033055.13	1180.44	-1.02075	0.0959364	-10.6399	1.94322e-26	7.31401e-25	chr15	78937293	78947093	-	NA
ENSMUSG00000024664.6	154.701	2.1031	0.197719	10.6368	2.00896e-26	7.5503e-25	chr19	10018932	10037474	+	NA
ENSMUSG00000059355.14	963.712	-0.917875	0.0864352	-10.6192	2.42585e-26	9.10372e-25	chr8	85807368	85808968	+	NA
ENSMUSG00000041949.7	857.432	-0.847039	0.0797949	-10.6152	2.53235e-26	9.48945e-25	chr8	107409699	107578071	+	NA
ENSMUSG00000067370.5	75.9689	2.24057	0.211078	10.6149	2.54091e-26	9.50754e-25	chr17	34168882	34170462	-	NA
ENSMUSG00000031840.15	869.661	-0.91932	0.0866646	-10.6078	2.74166e-26	1.02437e-24	chr8	71207327	71211323	+	NA
ENSMUSG00000074521.11	145.763	1.56073	0.147151	10.6063	2.78521e-26	1.03912e-24	chr2	177538888	177551310	+	NA
ENSMUSG00000026200.14	295.149	1.3726	0.129476	10.6012	2.9415e-26	1.09583e-24	chr1	75174879	75187457	-	NA
ENSMUSG00000034342.10	3324.33	0.728748	0.0687595	10.5985	3.02793e-26	1.12638e-24	chr9	44054272	44145346	-	NA
ENSMUSG00000001751.10	907.302	1.08739	0.102613	10.597	3.07833e-26	1.14346e-24	chr11	100960837	100968498	+	NA
ENSMUSG00000021198.17	831.496	-1.211	0.114309	-10.5941	3.17432e-26	1.1774e-24	chr12	102915117	103150324	+	NA
ENSMUSG00000053297.15	67.2506	-1.9701	0.186012	-10.5912	3.27201e-26	1.21188e-24	chr6	48603697	48610623	+	NA
ENSMUSG00000038805.11	138.742	-2.45362	0.23169	-10.5901	3.31239e-26	1.22506e-24	chr17	85921035	85936730	+	NA
ENSMUSG00000015981.13	81.3536	2.24248	0.211813	10.587	3.42251e-26	1.26395e-24	chr7	138683553	138793223	-	NA
ENSMUSG00000029153.12	71.3987	-2.97123	0.280818	-10.5807	3.66404e-26	1.35119e-24	chr5	73479541	73498371	-	NA
ENSMUSG00000050321.4	1563.93	-1.43292	0.135526	-10.573	3.97598e-26	1.46411e-24	chr18	86413076	86524843	+	NA
ENSMUSG00000074781.6	5474.95	-0.768423	0.0727514	-10.5623	4.45512e-26	1.63819e-24	chr10	95351006	95381519	+	NA
ENSMUSG00000027309.19	2888.14	1.4308	0.135478	10.5611	4.51148e-26	1.65653e-24	chr2	130548119	130748326	-	NA
ENSMUSG00000000305.13	5178.14	-1.13217	0.107236	-10.5577	4.67749e-26	1.71501e-24	chr2	179084223	179541166	+	NA
ENSMUSG00000000632.14	2570.82	-1.9451	0.184247	-10.557	4.71409e-26	1.72595e-24	chr11	77821625	77869874	+	NA
ENSMUSG00000031487.6	644.242	-1.02448	0.0971047	-10.5503	5.06416e-26	1.85147e-24	chr8	27613391	27618708	-	NA
ENSMUSG00000002341.9	57800.1	-1.21202	0.114928	-10.5459	5.3051e-26	1.93678e-24	chr8	70545734	70573523	-	NA
ENSMUSG00000035064.18	2938.25	1.46419	0.138854	10.5448	5.36654e-26	1.95641e-24	chr7	120442053	120506673	+	NA
ENSMUSG00000046598.16	187.369	-6.81449	0.646475	-10.541	5.5903e-26	2.03508e-24	chr16	31241097	31277719	+	NA
ENSMUSG00000026307.13	400.36	1.26193	0.119744	10.5386	5.73743e-26	2.08566e-24	chr1	91226059	91248797	+	NA
ENSMUSG00000038122.10	521.036	-0.869846	0.0825758	-10.5339	6.02759e-26	2.18803e-24	chr10	55890388	56104785	-	NA
ENSMUSG00000031451.7	137.19	-2.95811	0.280833	-10.5333	6.06413e-26	2.19816e-24	chr8	13515373	13544490	-	NA
ENSMUSG00000024413.15	4423.64	1.41629	0.134506	10.5296	6.31173e-26	2.28467e-24	chr18	12322748	12369457	-	NA
ENSMUSG00000029560.13	2047.51	0.71423	0.0678597	10.5251	6.6194e-26	2.39264e-24	chr5	140326053	140375017	-	NA
ENSMUSG00000086370.11	254.917	-1.19951	0.114031	-10.5191	7.05342e-26	2.54591e-24	chrX	102604512	102667396	-	NA
ENSMUSG00000025287.16	167.22	-9.81653	0.933594	-10.5148	7.3855e-26	2.66202e-24	chrX	154045438	154080650	+	NA
ENSMUSG00000053117.13	59.9503	2.85768	0.271847	10.5121	7.59947e-26	2.73527e-24	chr19	60132996	60160005	+	NA
ENSMUSG00000040118.16	1810.21	1.26944	0.120859	10.5035	8.32539e-26	2.99233e-24	chr5	16139688	16579509	+	NA
ENSMUSG00000005125.14	63.4283	-5.62247	0.535329	-10.5028	8.38369e-26	3.00905e-24	chr15	66801166	66841489	-	NA
ENSMUSG00000031431.14	888.255	-2.481	0.236319	-10.4985	8.77488e-26	3.14503e-24	chrX	139440276	139501408	-	NA
ENSMUSG00000026058.12	63.8161	-3.13678	0.299109	-10.4871	9.90278e-26	3.54431e-24	chr1	32211794	32697649	+	NA
ENSMUSG00000043243.16	302.156	-1.57156	0.149903	-10.4839	1.02443e-25	3.66141e-24	chr8	72050291	72060580	+	NA
ENSMUSG00000026791.15	354.967	1.06249	0.101393	10.4789	1.07997e-25	3.8545e-24	chr2	32863001	32872095	-	NA
ENSMUSG00000052794.14	681.257	-0.78234	0.0746903	-10.4744	1.13198e-25	4.03449e-24	chr8	73197723	73214845	+	NA
ENSMUSG00000074731.4	43.388	2.70982	0.258747	10.4729	1.15086e-25	4.09608e-24	chr2	150312910	150327011	-	NA
ENSMUSG00000112358.2	622.286	1.42413	0.13603	10.4692	1.19614e-25	4.25128e-24	chr12	46747857	46750999	-	NA
ENSMUSG00000004568.14	3080.53	-0.794301	0.0758757	-10.4684	1.20607e-25	4.28061e-24	chr8	3403414	3506601	+	NA
ENSMUSG00000040596.16	6197.08	0.853015	0.0815056	10.4657	1.2413e-25	4.39955e-24	chr1	166212190	166237432	-	NA
ENSMUSG00000027456.9	88.3921	1.77194	0.169429	10.4583	1.34253e-25	4.75173e-24	chr2	151414541	151431925	+	NA
ENSMUSG00000067860.12	35.5577	-3.87223	0.370265	-10.458	1.34696e-25	4.76081e-24	chrX	57068059	57087096	+	NA
ENSMUSG00000020412.17	1809.98	-0.941918	0.0901042	-10.4537	1.40975e-25	4.97585e-24	chr11	4587746	4635699	+	NA
ENSMUSG00000091586.3	240.795	1.70892	0.163727	10.4376	1.66942e-25	5.88424e-24	chr17	32725023	32749117	+	NA
ENSMUSG00000026259.15	38.128	-3.69685	0.354211	-10.4369	1.68259e-25	5.92248e-24	chr1	87404555	87501592	-	NA
ENSMUSG00000002342.18	2222.19	-0.784897	0.0753504	-10.4166	2.08202e-25	7.31834e-24	chr8	70625005	70636331	+	NA
ENSMUSG00000010086.18	61.9155	2.73301	0.262461	10.413	2.16275e-25	7.59162e-24	chr11	61339267	61344957	-	NA
ENSMUSG00000005682.10	2649.81	-0.849674	0.0816068	-10.4118	2.1902e-25	7.67745e-24	chr10	128139203	128157227	+	NA
ENSMUSG00000100417.4	41.9803	-2.92391	0.280859	-10.4106	2.21803e-25	7.76431e-24	chr19	45288893	45326874	-	NA
ENSMUSG00000003363.16	1925.35	1.09945	0.105628	10.4087	2.26181e-25	7.89888e-24	chr7	27231424	27252643	-	NA
ENSMUSG00000031843.3	1524.03	-1.39811	0.134321	-10.4087	2.26266e-25	7.89888e-24	chr8	118518383	118528682	-	NA
ENSMUSG00000002897.6	122.586	-2.23723	0.214954	-10.4079	2.28132e-25	7.95315e-24	chr6	120440207	120464520	+	NA
ENSMUSG00000021095.6	69.2034	-3.39955	0.326695	-10.4059	2.33098e-25	8.11519e-24	chr12	104437467	104439589	-	NA
ENSMUSG00000095105.3	37.1733	-4.81147	0.462619	-10.4005	2.46616e-25	8.57412e-24	chr13	12487512	12535319	-	NA
ENSMUSG00000040148.6	49.6453	-6.49535	0.624674	-10.398	2.5324e-25	8.79241e-24	chr7	131144595	131146654	+	NA
ENSMUSG00000085873.3	250.411	1.80903	0.174123	10.3894	2.77231e-25	9.6123e-24	chr4	109259475	109263430	-	NA
ENSMUSG00000038446.9	1810.79	-0.674836	0.0650164	-10.3795	3.07462e-25	1.0646e-23	chr10	40707616	40759307	-	NA
ENSMUSG00000074892.10	68.7939	2.29371	0.221002	10.3787	3.10018e-25	1.072e-23	chr16	96037000	96121059	+	NA
ENSMUSG00000035944.18	72.5404	3.79224	0.365462	10.3766	3.16992e-25	1.09463e-23	chr15	85716506	85743023	+	NA
ENSMUSG00000024667.13	271.572	-1.17676	0.113415	-10.3757	3.19855e-25	1.10303e-23	chr19	10511228	10533602	-	NA
ENSMUSG00000049624.15	938.339	0.83341	0.0803783	10.3686	3.44558e-25	1.18661e-23	chr9	78443769	78495323	-	NA
ENSMUSG00000108030.2	61.3992	2.40122	0.231669	10.3649	3.58292e-25	1.23224e-23	chr6	116176368	116184954	-	NA
ENSMUSG00000032359.15	32.0753	-4.97467	0.480046	-10.3629	3.65736e-25	1.25615e-23	chr9	89936204	89958142	+	NA
ENSMUSG00000037260.9	1959.73	-0.657371	0.0634637	-10.3582	3.84042e-25	1.31725e-23	chr8	26434480	26466781	-	NA
ENSMUSG00000020576.11	1755.05	-0.628741	0.0607627	-10.3475	4.29648e-25	1.4717e-23	chr12	13319133	13633812	+	NA
ENSMUSG00000058301.9	7167.78	-0.635695	0.0614394	-10.3467	4.33184e-25	1.48183e-23	chr8	70784174	70805928	-	NA
ENSMUSG00000021703.10	10921	1.45037	0.140217	10.3437	4.46784e-25	1.5263e-23	chr13	92747598	92848455	+	NA
ENSMUSG00000079083.4	795.998	0.898319	0.0868815	10.3396	4.66504e-25	1.59154e-23	chr9	13242611	13245834	-	NA
ENSMUSG00000001053.16	117.163	-5.49646	0.531824	-10.3351	4.88821e-25	1.66545e-23	chr11	51533889	51541669	-	NA
ENSMUSG00000032299.11	1640.3	0.722695	0.0700085	10.323	5.54826e-25	1.88782e-23	chr9	57062318	57065615	-	NA
ENSMUSG00000098980.3	146.05	-10.778	1.04433	-10.3205	5.69399e-25	1.93482e-23	chr4	107944553	107944646	+	NA
ENSMUSG00000031428.12	390.175	-1.49762	0.145129	-10.3192	5.76872e-25	1.9576e-23	chrX	135893903	135899221	+	NA
ENSMUSG00000033327.19	40.3313	2.86477	0.277645	10.3181	5.83625e-25	1.97527e-23	chr17	34879430	34938789	+	NA
ENSMUSG00000031913.10	3004.82	-0.639047	0.0619338	-10.3182	5.82863e-25	1.97527e-23	chr8	107757853	107772387	+	NA
ENSMUSG00000003228.10	622.985	-0.971564	0.094205	-10.3133	6.13642e-25	2.07411e-23	chr19	60878186	61084406	+	NA
ENSMUSG00000031388.15	563.039	-1.20745	0.117098	-10.3115	6.25317e-25	2.11077e-23	chrX	72960478	72965550	-	NA
ENSMUSG00000000902.14	4025.72	-0.66657	0.0646972	-10.3029	6.83562e-25	2.30433e-23	chr10	75732602	75757451	-	NA
ENSMUSG00000046844.7	124.667	-8.83727	0.858288	-10.2964	7.31499e-25	2.46268e-23	chr8	114932351	115100811	+	NA
ENSMUSG00000113835.3	412.404	-1.66151	0.161381	-10.2956	7.37796e-25	2.48061e-23	chr12	105866069	105868692	+	NA
ENSMUSG00000042797.10	147.416	1.29242	0.125601	10.2899	7.82794e-25	2.62844e-23	chr7	97373212	97387496	-	NA
ENSMUSG00000032897.18	1335.28	-0.752658	0.0732	-10.2822	8.4761e-25	2.84233e-23	chr4	120614634	120688769	-	NA
ENSMUSG00000051367.9	150.002	-1.73767	0.169009	-10.2815	8.53932e-25	2.85977e-23	chr12	73086788	73100661	-	NA
ENSMUSG00000041084.9	3069.76	-0.993387	0.0966427	-10.279	8.76633e-25	2.93195e-23	chr3	130489560	130503093	-	NA
ENSMUSG00000003348.11	1283.59	-0.646406	0.0629062	-10.2757	9.06792e-25	3.02885e-23	chr10	80521086	80537811	-	NA
ENSMUSG00000040794.6	44.389	-6.10188	0.593913	-10.274	9.22664e-25	3.07784e-23	chr2	90716203	90720869	+	NA
ENSMUSG00000051537.11	46.9388	4.96151	0.483039	10.2714	9.47727e-25	3.15732e-23	chrX	21227074	21230871	+	NA
ENSMUSG00000060038.15	656.886	-0.897819	0.0874901	-10.2619	1.04575e-24	3.47934e-23	chr8	85798385	85801791	+	NA
ENSMUSG00000026511.8	2868.87	-1.11517	0.108688	-10.2603	1.06369e-24	3.5344e-23	chr1	181952301	181959972	+	NA
ENSMUSG00000023068.17	3658.16	-0.915489	0.0892464	-10.258	1.08946e-24	3.61532e-23	chr10	52293642	52316279	+	NA
ENSMUSG00000025375.16	1359.58	-1.23338	0.120291	-10.2533	1.14427e-24	3.79229e-23	chr11	119898138	119937993	-	NA
ENSMUSG00000033228.9	7446.73	-0.857723	0.0836689	-10.2514	1.16644e-24	3.86076e-23	chr15	96309579	96358724	-	NA
ENSMUSG00000107859.2	133.693	1.66755	0.162744	10.2465	1.22747e-24	4.05748e-23	chr4	22490547	22493126	+	NA
ENSMUSG00000064141.15	188.73	-1.3416	0.130963	-10.2441	1.25784e-24	4.1525e-23	chr4	120787333	120808896	-	NA
ENSMUSG00000042804.14	109.271	-2.73324	0.266991	-10.2372	1.3511e-24	4.45461e-23	chr4	152358688	152369794	+	NA
ENSMUSG00000025591.7	1404.78	-1.23393	0.120583	-10.2331	1.40937e-24	4.64073e-23	chr8	66925769	66939182	-	NA
ENSMUSG00000039908.15	433.425	1.11556	0.109022	10.2324	1.41994e-24	4.66951e-23	chr11	119246382	119271905	+	NA
ENSMUSG00000000486.14	179.047	1.27451	0.124771	10.2148	1.70241e-24	5.59122e-23	chr7	126813618	126832302	-	NA
ENSMUSG00000031657.17	2540.64	-1.15993	0.113572	-10.2132	1.73041e-24	5.67587e-23	chr8	88864482	88898655	+	NA
ENSMUSG00000042750.8	4392.91	-0.999443	0.0978923	-10.2096	1.79567e-24	5.88236e-23	chrX	134967312	134968985	-	NA
ENSMUSG00000024642.18	2649.77	0.867704	0.0850337	10.2042	1.89818e-24	6.21021e-23	chr19	14425513	14575415	-	NA
ENSMUSG00000061232.17	699.243	-2.1858	0.214243	-10.2024	1.93342e-24	6.31742e-23	chr17	34214990	34219321	-	NA
ENSMUSG00000031684.12	1027.67	-1.32913	0.130301	-10.2005	1.97322e-24	6.4392e-23	chr8	79235974	79460632	+	NA
ENSMUSG00000029119.10	617.275	2.14474	0.210265	10.2002	1.97866e-24	6.44871e-23	chr5	36964264	36987997	-	NA
ENSMUSG00000069206.15	169.111	-1.23387	0.121067	-10.1916	2.16097e-24	7.03391e-23	chr13	67572667	67599743	-	NA
ENSMUSG00000037419.10	634.92	1.71991	0.168832	10.1871	2.26317e-24	7.35717e-23	chr9	14265285	14292803	-	NA
ENSMUSG00000108601.2	580.976	1.57137	0.154272	10.1857	2.29734e-24	7.45877e-23	chr7	73071997	73073650	+	NA
ENSMUSG00000024749.10	43.3006	3.61659	0.355194	10.182	2.38574e-24	7.73593e-23	chr19	20760821	20931566	-	NA
ENSMUSG00000029161.9	33.4197	-4.76536	0.468794	-10.1652	2.83672e-24	9.18659e-23	chr5	31090486	31102935	-	NA
ENSMUSG00000004383.19	1921.43	-0.530333	0.0522104	-10.1576	3.06459e-24	9.91193e-23	chr8	73541226	74080168	-	NA
ENSMUSG00000060098.12	2736.53	-1.14846	0.113179	-10.1472	3.40956e-24	1.10138e-22	chr8	106937567	106979426	+	NA
ENSMUSG00000029442.19	81.6694	2.15336	0.212345	10.1409	3.63894e-24	1.17398e-22	chr5	123390164	123465547	+	NA
ENSMUSG00000022505.10	402.466	-5.70512	0.562622	-10.1402	3.66201e-24	1.17993e-22	chr16	10099612	10131832	-	NA
ENSMUSG00000051043.17	42.1576	3.30768	0.326382	10.1344	3.8883e-24	1.25127e-22	chr11	114741977	114763443	+	NA
ENSMUSG00000035215.10	2058.22	-0.887756	0.0876558	-10.1277	4.16126e-24	1.33742e-22	chr10	80688654	80691043	-	NA
ENSMUSG00000000202.10	7752.09	1.33747	0.132075	10.1266	4.2092e-24	1.35113e-22	chr11	114682042	114686771	-	NA
ENSMUSG00000038215.16	906.31	-0.820509	0.0810943	-10.118	4.59868e-24	1.47429e-22	chr8	56984556	57004082	-	NA
ENSMUSG00000056812.15	59.5697	-9.47716	0.936918	-10.1152	4.72825e-24	1.51393e-22	chr18	64387429	64412682	+	NA
ENSMUSG00000023092.17	4758.71	0.755294	0.074671	10.115	4.74206e-24	1.51645e-22	chrX	55777146	55838706	+	NA
ENSMUSG00000030761.17	386.279	1.27611	0.126164	10.1147	4.75464e-24	1.51857e-22	chr7	97700266	97768731	-	NA
ENSMUSG00000031485.16	2599.61	-0.783608	0.077487	-10.1128	4.84966e-24	1.54698e-22	chr8	27532582	27546160	+	NA
ENSMUSG00000045284.10	60.7074	-9.5008	0.940077	-10.1064	5.17449e-24	1.64854e-22	chrX	43875446	43879074	-	NA
ENSMUSG00000036810.17	2246.8	-0.91675	0.0907277	-10.1044	5.28094e-24	1.68035e-22	chr8	88845396	88861738	+	NA
ENSMUSG00000031482.10	1079.88	-1.11465	0.110419	-10.0948	5.82603e-24	1.85149e-22	chr8	22865566	22888613	-	NA
ENSMUSG00000020246.14	1281.96	-0.780107	0.0774397	-10.0737	7.21873e-24	2.29123e-22	chr10	82531993	82578262	+	NA
ENSMUSG00000043153.7	55.7785	-9.40024	0.933907	-10.0655	7.84946e-24	2.48833e-22	chr12	36431448	36739502	+	NA
ENSMUSG00000066842.19	843.479	1.60164	0.159199	10.0606	8.2495e-24	2.6119e-22	chr1	150438274	150869186	-	NA
ENSMUSG00000100691.3	453.332	-1.05184	0.104561	-10.0596	8.33485e-24	2.63565e-22	chr8	71229400	71230472	+	NA
ENSMUSG00000039835.17	3545.47	-0.887143	0.0882513	-10.0525	8.96058e-24	2.83001e-22	chr10	18194732	18409640	+	NA
ENSMUSG00000005483.11	3109.66	-0.914988	0.0910918	-10.0447	9.6957e-24	3.0584e-22	chr8	84334821	84339282	+	NA
ENSMUSG00000038203.23	53.6834	-9.33152	0.92904	-10.0443	9.73765e-24	3.06784e-22	chr6	52234673	52237788	-	NA
ENSMUSG00000007721.7	4350.39	-1.00605	0.100257	-10.0347	1.07254e-23	3.37487e-22	chr8	71320870	71326579	-	NA
ENSMUSG00000022635.10	2252.11	-0.840177	0.0837383	-10.0334	1.08741e-23	3.41743e-22	chr15	93283977	93296215	-	NA
ENSMUSG00000063605.6	464.787	-0.975832	0.0973869	-10.0202	1.24302e-23	3.90166e-22	chr8	95629496	95644726	-	NA
ENSMUSG00000055202.12	76.2713	-2.98138	0.297667	-10.0158	1.29886e-23	4.07194e-22	chr17	33014649	33028905	-	NA
ENSMUSG00000046500.9	702.02	-2.01241	0.200992	-10.0124	1.34482e-23	4.21086e-22	chr6	96808163	97037374	-	NA
ENSMUSG00000112907.2	193.601	-4.63504	0.463161	-10.0074	1.41419e-23	4.42263e-22	chr10	79248795	79253739	-	NA
ENSMUSG00000038156.17	1795.18	1.73186	0.173065	10.007	1.41971e-23	4.43447e-22	chr7	113365234	113642605	+	NA
ENSMUSG00000043398.6	162.028	1.83173	0.183498	9.98225	1.82278e-23	5.6865e-22	chr12	72114749	72117899	-	NA
ENSMUSG00000022769.10	1314.93	-2.07155	0.207592	-9.97895	1.8845e-23	5.87186e-22	chr16	16948001	16950247	-	NA
ENSMUSG00000052302.7	178.559	-2.06354	0.207025	-9.96757	2.11329e-23	6.57672e-22	chr10	121099724	121187183	-	NA
ENSMUSG00000026657.18	6794.24	1.24968	0.125388	9.96653	2.13564e-23	6.63818e-22	chr2	4022527	4618854	+	NA
ENSMUSG00000027994.15	89.6772	-1.63461	0.164036	-9.96492	2.17044e-23	6.73813e-22	chr3	129708608	129763855	-	NA
ENSMUSG00000031708.18	11142	-0.64691	0.0649229	-9.96428	2.18446e-23	6.77342e-22	chr8	84298326	84334600	-	NA
ENSMUSG00000020682.18	160.269	-6.45709	0.648368	-9.95898	2.30422e-23	7.13608e-22	chr11	83331593	83353897	-	NA
ENSMUSG00000040699.14	1565.64	-0.746094	0.0749671	-9.95229	2.46445e-23	7.62308e-22	chr11	106047081	106051686	-	NA
ENSMUSG00000038822.16	977.763	-0.674231	0.0677539	-9.95118	2.49205e-23	7.69911e-22	chr10	45453924	45588441	+	NA
ENSMUSG00000020248.19	1148.8	-0.94041	0.0945049	-9.95092	2.49865e-23	7.71016e-22	chr10	82584534	82599978	-	NA
ENSMUSG00000027583.14	495.882	1.19285	0.120024	9.93842	2.83281e-23	8.73074e-22	chr2	181029554	181101219	-	NA
ENSMUSG00000051339.11	755.57	1.8235	0.183538	9.93529	2.92315e-23	8.99831e-22	chr5	113234188	113369102	-	NA
ENSMUSG00000056228.11	819.295	-0.947242	0.0953517	-9.93419	2.95559e-23	9.0872e-22	chr8	11563976	11600783	-	NA
ENSMUSG00000022314.11	15853.5	-0.773954	0.0779207	-9.93258	3.00394e-23	9.22474e-22	chr15	51825635	51855143	-	NA
ENSMUSG00000055067.16	887.739	0.867687	0.0873618	9.93211	3.0181e-23	9.25707e-22	chr1	178779524	179345606	-	NA
ENSMUSG00000040260.9	471.495	-1.90081	0.191428	-9.92963	3.09403e-23	9.47859e-22	chr17	49763049	49871371	-	NA
ENSMUSG00000048058.18	1291.72	0.915422	0.0922193	9.92657	3.19039e-23	9.76205e-22	chr2	101780547	102016730	-	NA
ENSMUSG00000031762.8	132.623	-3.01209	0.303533	-9.92345	3.29171e-23	1.006e-21	chr8	94899291	94900196	+	NA
ENSMUSG00000036913.16	1814.87	-1.08474	0.10933	-9.92173	3.34917e-23	1.02234e-21	chr8	125519830	125561452	+	NA
ENSMUSG00000098188.2	1760.64	0.657029	0.0662263	9.92096	3.37481e-23	1.02894e-21	chr10	59057774	59062256	+	NA
ENSMUSG00000009035.16	2056.88	-1.0346	0.104296	-9.91983	3.41334e-23	1.03944e-21	chr15	79244883	79287769	-	NA
ENSMUSG00000029765.13	75.9624	-3.3233	0.335089	-9.91766	3.4885e-23	1.06106e-21	chr6	32121202	32565127	-	NA
ENSMUSG00000034282.4	56.4964	2.2912	0.231062	9.91597	3.54788e-23	1.07784e-21	chr11	116111384	116128903	-	NA
ENSMUSG00000042529.15	165.603	4.68105	0.472394	9.9092	3.79665e-23	1.15204e-21	chr11	60913389	60961957	+	NA
ENSMUSG00000106825.2	54.3145	2.54118	0.256501	9.90709	3.8779e-23	1.1753e-21	chr5	120690119	120691104	-	NA
ENSMUSG00000069793.13	641.427	-6.25646	0.631536	-9.90674	3.89145e-23	1.17801e-21	chr11	82869215	82882656	-	NA
ENSMUSG00000008658.17	26.6556	-4.12593	0.416564	-9.90468	3.97248e-23	1.20111e-21	chr16	5703218	7229390	+	NA
ENSMUSG00000038608.16	5607.81	0.76716	0.0774972	9.89919	4.19677e-23	1.26742e-21	chr1	80478789	80736244	-	NA
ENSMUSG00000044986.11	745.905	-1.45814	0.147337	-9.8966	4.3065e-23	1.29903e-21	chr15	78283755	78290107	-	NA
ENSMUSG00000107283.4	595.023	0.792122	0.0800617	9.8939	4.4247e-23	1.3331e-21	chr5	31297997	31311595	-	NA
ENSMUSG00000063434.7	74.7058	-9.22807	0.93288	-9.89202	4.50832e-23	1.3567e-21	chr19	48194463	48793944	+	NA
ENSMUSG00000021245.16	571.981	-1.02826	0.104041	-9.88323	4.92196e-23	1.47943e-21	chr12	85281293	85317373	-	NA
ENSMUSG00000030654.10	13534.3	0.83309	0.0843017	9.88225	4.97065e-23	1.49231e-21	chr7	117718113	117728885	-	NA
ENSMUSG00000097097.3	59.5961	-4.08132	0.41305	-9.88094	5.03598e-23	1.51014e-21	chr8	121925452	121930341	-	NA
ENSMUSG00000037706.18	11241	0.864077	0.0874654	9.87907	5.1307e-23	1.53674e-21	chr7	142606475	142621671	+	NA
ENSMUSG00000020728.18	65.8718	-3.50382	0.354718	-9.87778	5.19694e-23	1.55476e-21	chr11	108316017	108751441	+	NA
ENSMUSG00000078429.10	6809.47	-0.828675	0.0839342	-9.87291	5.45571e-23	1.63026e-21	chr10	126814585	126835844	+	NA
ENSMUSG00000037458.16	5069.73	-0.73947	0.0749123	-9.87115	5.55271e-23	1.6573e-21	chr15	38487670	38519510	-	NA
ENSMUSG00000036006.21	83.3782	-2.23191	0.226234	-9.86551	5.87325e-23	1.75093e-21	chr13	24685507	24917799	+	NA
ENSMUSG00000036800.9	81.8251	-9.35616	0.948856	-9.86046	6.17638e-23	1.83915e-21	chr15	71303457	71599687	-	NA
ENSMUSG00000048355.3	571.566	-0.804518	0.0815928	-9.86015	6.19557e-23	1.84271e-21	chrX	134934115	134935695	+	NA
ENSMUSG00000040028.11	3623.89	-0.663868	0.0673562	-9.85607	6.45257e-23	1.91692e-21	chr8	4335381	4375413	-	NA
ENSMUSG00000001665.12	36.0421	5.37983	0.546438	9.84528	7.18377e-23	2.13166e-21	chr10	75609948	75617248	-	NA
ENSMUSG00000016528.11	5213.72	0.997896	0.101397	9.84144	7.46347e-23	2.21208e-21	chr1	130981436	131025563	-	NA
ENSMUSG00000079260.4	283.77	1.03615	0.105307	9.83934	7.62123e-23	2.25622e-21	chr9	114230172	114236344	+	NA
ENSMUSG00000119984.1	29.8577	3.63058	0.368999	9.83902	7.6453e-23	2.26072e-21	chrX	49626208	49680423	+	NA
ENSMUSG00000047033.3	99.7879	2.19466	0.223063	9.83876	7.66463e-23	2.26382e-21	chr18	37606592	37609393	+	NA
ENSMUSG00000002190.14	92.4011	-2.77551	0.282176	-9.8361	7.87059e-23	2.32196e-21	chr8	84116495	84155181	+	NA
ENSMUSG00000038546.10	3670.71	0.961304	0.0977467	9.83464	7.98524e-23	2.35306e-21	chr13	43556150	43634758	-	NA
ENSMUSG00000036977.9	759.328	-0.908623	0.0924388	-9.82945	8.40742e-23	2.47461e-21	chr8	80438448	80505688	+	NA
ENSMUSG00000041548.5	67.4308	-9.08564	0.924398	-9.82871	8.46935e-23	2.48997e-21	chr5	116546549	116560923	-	NA
ENSMUSG00000087479.3	124.532	1.81196	0.184475	9.82224	9.03109e-23	2.65206e-21	chr14	119336376	119352486	+	NA
ENSMUSG00000096225.8	48.3065	-9.19119	0.937195	-9.80713	1.04913e-22	3.07732e-21	chr3	154011930	154036296	-	NA
ENSMUSG00000059602.15	96.304	-1.6938	0.172763	-9.8042	1.07994e-22	3.16408e-21	chr10	85890988	86334760	-	NA
ENSMUSG00000022261.7	912.392	-1.09963	0.112205	-9.80014	1.12429e-22	3.29023e-21	chr15	32920868	33035081	+	NA
ENSMUSG00000078851.5	121.516	1.81347	0.185147	9.79474	1.18608e-22	3.46707e-21	chr11	58845510	58847656	+	NA
ENSMUSG00000021665.10	800.562	0.955464	0.0976009	9.7895	1.24914e-22	3.64723e-21	chr13	97312838	97334865	-	NA
ENSMUSG00000062074.8	67.7838	1.78714	0.182595	9.78741	1.27519e-22	3.71903e-21	chr10	39026965	39039790	-	NA
ENSMUSG00000029228.16	629.39	1.37888	0.140891	9.78688	1.28184e-22	3.73417e-21	chr5	74753107	74863573	-	NA
ENSMUSG00000093674.8	33120.5	-0.866822	0.0886269	-9.78057	1.36434e-22	3.96997e-21	chr10	128383982	128385174	-	NA
ENSMUSG00000067158.10	53.516	-2.41819	0.247355	-9.7762	1.42457e-22	4.1358e-21	chr1	82426143	82564570	-	NA
ENSMUSG00000098087.3	40.086	-3.74356	0.382924	-9.77625	1.42388e-22	4.1358e-21	chr13	84173415	84212922	-	NA
ENSMUSG00000045996.13	839.079	-0.796986	0.0815328	-9.77504	1.44099e-22	4.1787e-21	chr15	36174155	36177156	+	NA
ENSMUSG00000017692.9	1932.32	1.97619	0.202257	9.77072	1.50375e-22	4.35576e-21	chr11	80191737	80246781	+	NA
ENSMUSG00000044080.10	39.5903	-6.18253	0.632834	-9.76958	1.52079e-22	4.40013e-21	chr3	90418340	90421699	-	NA
ENSMUSG00000043541.17	121.43	1.57622	0.161353	9.76874	1.5334e-22	4.42656e-21	chr6	145120559	145156731	-	NA
ENSMUSG00000063334.17	1993.98	-0.705224	0.0721913	-9.76883	1.53218e-22	4.42656e-21	chr10	111808568	111824337	+	NA
ENSMUSG00000045777.15	64.329	2.67583	0.273974	9.76673	1.5642e-22	4.51037e-21	chr7	141879573	141927490	-	NA
ENSMUSG00000022200.9	4699.49	-1.15381	0.118139	-9.76655	1.56692e-22	4.51311e-21	chr15	12321535	12351677	+	NA
ENSMUSG00000035576.14	32.1826	3.30379	0.338342	9.76466	1.59654e-22	4.59324e-21	chr2	162785391	162816442	+	NA
ENSMUSG00000026958.14	416.86	1.03529	0.106028	9.76431	1.60194e-22	4.60359e-21	chr2	25242287	25246371	-	NA
ENSMUSG00000074247.11	4906.14	-0.836424	0.0857075	-9.75905	1.68733e-22	4.84286e-21	chr8	71921842	71928742	+	NA
ENSMUSG00000063253.12	1447.73	-0.933935	0.0957004	-9.75895	1.689e-22	4.84286e-21	chr8	84156712	84185020	-	NA
ENSMUSG00000019989.9	353.711	-2.26465	0.232279	-9.7497	1.85006e-22	5.29874e-21	chr10	24648303	24718721	-	NA
ENSMUSG00000048960.14	84.6362	-8.28749	0.850403	-9.74537	1.93084e-22	5.52388e-21	chr1	11063688	11373905	+	NA
ENSMUSG00000050936.6	37.1007	4.81001	0.49361	9.74456	1.94622e-22	5.56165e-21	chr3	96177036	96186317	+	NA
ENSMUSG00000009905.6	1042.02	0.705967	0.0724564	9.74334	1.96963e-22	5.62226e-21	chr1	106648188	106687457	-	NA
ENSMUSG00000064329.15	118.548	-1.7433	0.17897	-9.74072	2.02115e-22	5.76076e-21	chr2	66101121	66271184	-	NA
ENSMUSG00000054013.7	34.6653	-5.38408	0.552743	-9.74064	2.02267e-22	5.76076e-21	chr12	112466622	112483181	-	NA
ENSMUSG00000019814.6	1503.29	-0.955158	0.0981316	-9.73344	2.17131e-22	6.17721e-21	chr10	13053883	13068912	-	NA
ENSMUSG00000016179.12	30.5235	-2.99412	0.307727	-9.7298	2.25035e-22	6.39495e-21	chr1	193028653	193052606	-	NA
ENSMUSG00000050556.10	1078.41	0.68149	0.0700661	9.72639	2.32716e-22	6.60587e-21	chr2	166937888	167032075	-	NA
ENSMUSG00000006732.15	670.245	-1.04321	0.107274	-9.7247	2.36612e-22	6.70901e-21	chr10	126877282	126882234	+	NA
ENSMUSG00000035547.15	60.24	2.21775	0.228082	9.72348	2.39466e-22	6.7824e-21	chr7	97770765	97827481	-	NA
ENSMUSG00000024772.10	2528.04	-0.925408	0.0951841	-9.72229	2.42264e-22	6.85403e-21	chr19	6326754	6350126	+	NA
ENSMUSG00000060803.7	1907.48	-1.17454	0.120858	-9.71835	2.51841e-22	7.11708e-21	chr19	4085406	4087985	-	NA
ENSMUSG00000043372.13	407.878	-0.978498	0.10069	-9.71795	2.52811e-22	7.13661e-21	chr11	103023254	103030702	+	NA
ENSMUSG00000086386.3	42.5439	2.82981	0.291258	9.71582	2.5815e-22	7.27926e-21	chr11	32045260	32086181	-	NA
ENSMUSG00000041112.18	863.053	1.04269	0.107378	9.71051	2.71961e-22	7.66023e-21	chr13	20274765	20792523	+	NA
ENSMUSG00000019774.9	401.073	-0.929524	0.0957607	-9.70674	2.82222e-22	7.94048e-21	chr10	5761886	5773910	-	NA
ENSMUSG00000060780.3	148.999	1.80264	0.185738	9.70531	2.86203e-22	8.04364e-21	chr6	77219671	77234774	+	NA
ENSMUSG00000051067.9	212.675	2.60206	0.268214	9.70141	2.97362e-22	8.34807e-21	chr10	80668634	80679873	-	NA
ENSMUSG00000117924.2	918.304	-1.27047	0.130961	-9.70114	2.98161e-22	8.36127e-21	chr19	8748359	8749839	+	NA
ENSMUSG00000021967.5	1307.98	-0.942726	0.0972514	-9.6937	3.20684e-22	8.98302e-21	chr14	58063690	58066753	+	NA
ENSMUSG00000026544.7	75.1653	-2.77177	0.286136	-9.68691	3.42757e-22	9.59081e-21	chr1	172458330	172460529	-	NA
ENSMUSG00000042229.10	1389.91	0.587719	0.0607214	9.67894	3.70523e-22	1.03564e-20	chr1	134422385	134436512	+	NA
ENSMUSG00000037336.15	147.351	1.17531	0.121455	9.67694	3.7787e-22	1.05502e-20	chr12	4912439	4924359	-	NA
ENSMUSG00000032398.8	391.81	0.925549	0.0956507	9.67635	3.80051e-22	1.05995e-20	chr9	64086555	64090414	+	NA
ENSMUSG00000037386.17	671.104	-1.27408	0.131684	-9.67533	3.83851e-22	1.06938e-20	chr15	39061655	39547768	+	NA
ENSMUSG00000056296.18	33.8967	-3.57972	0.369992	-9.67513	3.84586e-22	1.07026e-20	chr14	8853422	9184983	-	NA
ENSMUSG00000050822.12	919.896	2.20045	0.227911	9.65486	4.68795e-22	1.30318e-20	chr5	142678266	142708245	+	NA
ENSMUSG00000030638.14	77.7801	-8.15315	0.844881	-9.65006	4.91285e-22	1.36421e-20	chr7	81823587	81956627	+	NA
ENSMUSG00000020124.11	2636.45	-0.847412	0.0878737	-9.64352	5.236e-22	1.45236e-20	chr10	122940910	123032900	-	NA
ENSMUSG00000027171.11	44.5303	-2.98669	0.309843	-9.63937	5.45211e-22	1.51067e-20	chr2	104661085	104680221	-	NA
ENSMUSG00000031754.11	5300.46	-0.931512	0.096674	-9.6356	5.6561e-22	1.56549e-20	chr8	94742123	94763659	-	NA
ENSMUSG00000039891.7	93.4747	2.16822	0.225097	9.63237	5.83667e-22	1.61372e-20	chr10	17671973	17721413	+	NA
ENSMUSG00000024974.11	6331.99	-0.555579	0.057691	-9.63025	5.95841e-22	1.64559e-20	chr19	53588828	53634264	+	NA
ENSMUSG00000097767.10	931.472	3.701	0.384495	9.62561	6.23335e-22	1.71966e-20	chr5	112361093	112377261	-	NA
ENSMUSG00000046056.16	202.21	1.75388	0.18225	9.62349	6.36353e-22	1.75368e-20	chr7	30450895	30455559	+	NA
ENSMUSG00000062980.16	267.3	-2.03657	0.2117	-9.62007	6.57837e-22	1.81093e-20	chr6	21985914	22256403	+	NA
ENSMUSG00000040569.14	30.6414	-3.20154	0.332822	-9.61937	6.62325e-22	1.82132e-20	chr4	14502429	14621805	-	NA
ENSMUSG00000036469.17	259.969	-1.7717	0.184462	-9.60466	7.6406e-22	2.09882e-20	chr8	66070551	66924289	+	NA
ENSMUSG00000051251.4	43.8464	3.45833	0.360103	9.60372	7.71134e-22	2.11597e-20	chr1	171879858	171885140	-	NA
ENSMUSG00000034771.16	840.168	-1.78431	0.185834	-9.6016	7.87135e-22	2.15756e-20	chr10	81410394	81426679	+	NA
ENSMUSG00000025875.15	233.33	1.56284	0.162807	9.59933	8.04652e-22	2.20321e-20	chr13	54937189	54944589	+	NA
ENSMUSG00000032604.17	3265.14	0.811019	0.0845106	9.59666	8.25802e-22	2.2587e-20	chr9	108384904	108393140	+	NA
ENSMUSG00000016534.16	7698.57	0.863876	0.0900614	9.59207	8.63312e-22	2.35876e-20	chrX	37490233	37545331	-	NA
ENSMUSG00000032135.16	1135.39	1.1833	0.123504	9.58108	9.60367e-22	2.62113e-20	chr9	44045765	44054024	+	NA
ENSMUSG00000002249.22	455.354	0.977481	0.102109	9.57287	1.03975e-21	2.83477e-20	chr17	28550644	28569791	-	NA
ENSMUSG00000085741.10	201.494	1.25425	0.131026	9.57258	1.04275e-21	2.8399e-20	chr2	156685044	156704926	-	NA
ENSMUSG00000022306.10	2497.91	-1.18943	0.124287	-9.57005	1.06854e-21	2.90706e-20	chr15	40518430	40967988	+	NA
ENSMUSG00000027419.10	73.1983	-2.71688	0.283915	-9.56934	1.07591e-21	2.92397e-20	chr2	143388075	143658205	+	NA
ENSMUSG00000053004.10	206.525	1.5597	0.163171	9.55865	1.19297e-21	3.23867e-20	chr6	114374896	114460257	+	NA
ENSMUSG00000031458.9	944.051	-0.969762	0.101459	-9.55817	1.19858e-21	3.25044e-20	chr8	13934793	13940281	-	NA
ENSMUSG00000027434.12	42.6696	-8.9912	0.941023	-9.55471	1.23932e-21	3.35736e-20	chr2	147019465	147036163	-	NA
ENSMUSG00000045934.16	253.051	-2.43818	0.255243	-9.55239	1.26742e-21	3.42983e-20	chr3	96069320	96079034	+	NA
ENSMUSG00000000275.17	144.423	-10.1847	1.06667	-9.54817	1.3201e-21	3.56862e-20	chr11	88890201	88911119	+	NA
ENSMUSG00000044573.17	1776.23	-0.915721	0.0959123	-9.54748	1.3289e-21	3.5886e-20	chr12	30943324	30961588	-	NA
ENSMUSG00000042532.15	27.1617	-4.25534	0.445934	-9.54254	1.39377e-21	3.7598e-20	chr19	42236012	42258787	+	NA
ENSMUSG00000019055.16	7392.43	0.967143	0.101431	9.53498	1.49919e-21	4.03991e-20	chr4	147994209	148021224	-	NA
ENSMUSG00000072487.12	33.0902	-5.14062	0.53937	-9.53079	1.56093e-21	4.20185e-20	chr15	73631915	73711548	-	NA
ENSMUSG00000039007.11	40.8413	-3.2858	0.344846	-9.52831	1.59866e-21	4.29885e-20	chr15	33083274	33594698	+	NA
ENSMUSG00000022476.9	4070.31	-0.951942	0.0999657	-9.52269	1.68759e-21	4.53322e-20	chr15	81772428	81810441	-	NA
ENSMUSG00000059246.5	36.7826	-3.87271	0.40673	-9.52157	1.70587e-21	4.5775e-20	chr9	69664991	69668222	-	NA
ENSMUSG00000033684.15	2328.15	1.09729	0.115266	9.51963	1.73805e-21	4.65895e-20	chr1	155651774	155688635	-	NA
ENSMUSG00000005881.14	4831.14	0.692451	0.0727483	9.51845	1.75773e-21	4.70678e-20	chr2	155849964	155860199	+	NA
ENSMUSG00000053647.5	584.623	1.10205	0.115826	9.51476	1.8214e-21	4.87214e-20	chr5	139408905	139413555	+	NA
ENSMUSG00000025932.15	464.04	-1.34451	0.141377	-9.51011	1.90464e-21	5.08949e-20	chr1	14239177	14380459	-	NA
ENSMUSG00000067369.13	425.73	-0.919639	0.0967468	-9.50563	1.98835e-21	5.30761e-20	chrX	133123087	133177733	-	NA
ENSMUSG00000033107.7	37.9281	-8.84019	0.930121	-9.50435	2.0131e-21	5.36806e-20	chr18	21077681	21116919	+	NA
ENSMUSG00000059493.14	358.709	1.30638	0.137459	9.50378	2.0241e-21	5.39175e-20	chrX	160616291	160942726	-	NA
ENSMUSG00000025887.11	109.136	-2.67633	0.281964	-9.49173	2.27238e-21	6.04681e-20	chr9	5345429	5373032	+	NA
ENSMUSG00000120923.1	41.6924	-2.58951	0.272863	-9.49014	2.30722e-21	6.13313e-20	chr15	85519050	85520496	+	NA
ENSMUSG00000041757.18	219.17	1.86546	0.197006	9.46905	2.82402e-21	7.49907e-20	chr1	133091947	133231173	+	NA
ENSMUSG00000043415.6	194.89	2.04	0.215482	9.46714	2.8761e-21	7.62943e-20	chr2	19662562	19665394	+	NA
ENSMUSG00000072762.10	92.3227	1.55725	0.164541	9.46418	2.95879e-21	7.84065e-20	chr5	109883855	109899752	-	NA
ENSMUSG00000037034.17	38.7445	-8.85721	0.93657	-9.45707	3.16692e-21	8.38348e-20	chr2	147203844	147235215	+	NA
ENSMUSG00000038526.15	501.927	3.49947	0.370139	9.45448	3.24627e-21	8.58463e-20	chr3	95805079	95812003	-	NA
ENSMUSG00000078348.5	3229.93	-1.04928	0.11102	-9.45125	3.34815e-21	8.84487e-20	chr10	12881086	12884927	+	NA
ENSMUSG00000026821.17	3557.28	0.964239	0.102146	9.43984	3.73347e-21	9.85258e-20	chr2	28403136	28443093	+	NA
ENSMUSG00000024210.4	40.7242	2.96112	0.313731	9.43841	3.78485e-21	9.97786e-20	chr17	27362938	27386769	-	NA
ENSMUSG00000006651.9	2202.25	1.34082	0.142088	9.43657	3.852e-21	1.01444e-19	chr7	30134406	30144960	-	NA
ENSMUSG00000026627.8	1362.92	0.637971	0.067622	9.43437	3.93346e-21	1.03378e-19	chr1	191058108	191083111	+	NA
ENSMUSG00000029875.6	27.6453	-3.31425	0.351296	-9.43437	3.93352e-21	1.03378e-19	chr15	98065038	98068015	+	NA
ENSMUSG00000042271.14	1010.14	0.873733	0.0926194	9.43359	3.96278e-21	1.04039e-19	chrX	141009765	141022688	+	NA
ENSMUSG00000092210.2	48.9272	4.04608	0.429332	9.42413	4.33691e-21	1.13745e-19	chr10	115405890	115418353	+	NA
ENSMUSG00000006378.16	69.9377	-2.58488	0.274362	-9.42143	4.44976e-21	1.16585e-19	chr15	78915073	78922553	+	NA
ENSMUSG00000014498.10	3778.15	-0.515572	0.0547454	-9.41764	4.61334e-21	1.20746e-19	chr10	128212983	128244573	+	NA
ENSMUSG00000026427.17	735.901	-1.39707	0.148348	-9.41748	4.62026e-21	1.20804e-19	chr1	131080917	131115395	+	NA
ENSMUSG00000043467.20	1135.71	1.0458	0.111091	9.41387	4.7821e-21	1.24907e-19	chr1	160830491	160862419	-	NA
ENSMUSG00000049323.9	3351.03	0.916492	0.0974015	9.40943	4.98822e-21	1.30158e-19	chr11	60668349	60679113	+	NA
ENSMUSG00000013663.9	3296.63	-0.58324	0.0619869	-9.40908	5.00491e-21	1.3046e-19	chr19	32734896	32803560	+	NA
ENSMUSG00000056536.15	1693.22	-0.878923	0.0934931	-9.40094	5.40783e-21	1.40819e-19	chr1	105446146	105591402	-	NA
ENSMUSG00000049641.16	38.8297	-6.39596	0.680462	-9.39944	5.48555e-21	1.42697e-19	chr10	51898597	51904567	+	NA
ENSMUSG00000011257.20	7462.27	0.738671	0.0786936	9.38667	6.19275e-21	1.6093e-19	chr4	123156143	123192718	+	NA
ENSMUSG00000037103.9	1914.6	-0.954207	0.101742	-9.37872	6.67763e-21	1.73353e-19	chr8	84823700	84831397	-	NA
ENSMUSG00000031527.8	3982.06	-1.15633	0.123308	-9.37764	6.74652e-21	1.74964e-19	chr8	35932406	35963350	-	NA
ENSMUSG00000061897.6	222.27	-1.0933	0.116593	-9.37704	6.78512e-21	1.75786e-19	chr2	178819217	178819673	+	NA
ENSMUSG00000072591.12	45.5142	-9.08581	0.970385	-9.3631	7.74306e-21	2.00401e-19	chr5	128656162	128677806	-	NA
ENSMUSG00000052934.15	2258.84	-0.581892	0.0621745	-9.35902	8.04793e-21	2.0808e-19	chr8	122276178	122305545	-	NA
ENSMUSG00000005514.15	7442.31	1.17734	0.125841	9.35576	8.30028e-21	2.14387e-19	chr5	135698886	135764180	+	NA
ENSMUSG00000051726.7	38.2238	-8.85256	0.946369	-9.35423	8.4211e-21	2.17288e-19	chr12	17222100	17226889	-	NA
ENSMUSG00000029438.10	2530.03	0.801413	0.0856927	9.35218	8.58628e-21	2.21326e-19	chr5	123481896	123513055	+	NA
ENSMUSG00000033128.10	2718.4	-0.857115	0.0916751	-9.34949	8.80727e-21	2.26794e-19	chr15	78761389	78778785	+	NA
ENSMUSG00000026187.10	1492.57	-1.0037	0.107359	-9.34904	8.84471e-21	2.27528e-19	chr1	72346585	72434111	+	NA
ENSMUSG00000089838.2	133.641	-1.28549	0.137505	-9.34872	8.87123e-21	2.27981e-19	chr1	170752877	170753213	-	NA
ENSMUSG00000047115.16	45.6857	-6.95978	0.74469	-9.34588	9.11248e-21	2.33945e-19	chr6	49344672	49367473	+	NA
ENSMUSG00000091383.3	44.8106	8.79786	0.941716	9.34237	9.41998e-21	2.41354e-19	chr13	51356762	51357101	-	NA
ENSMUSG00000028278.15	1733.2	0.713306	0.0763513	9.34242	9.41569e-21	2.41354e-19	chr4	32983036	33022180	+	NA
ENSMUSG00000024228.13	121.702	-2.11558	0.226457	-9.34207	9.44686e-21	2.41716e-19	chr17	59306612	59320367	-	NA
ENSMUSG00000050967.6	46.0864	-2.48465	0.265965	-9.342	9.45304e-21	2.41716e-19	chr1	39657573	39690642	-	NA
ENSMUSG00000049916.13	447.303	-1.27038	0.135991	-9.34161	9.48805e-21	2.42368e-19	chr16	16931261	16943031	-	NA
ENSMUSG00000026566.16	6274.21	0.898297	0.0963518	9.32309	1.12998e-20	2.88359e-19	chr1	165419808	165462107	-	NA
ENSMUSG00000090137.9	630.64	0.712897	0.076487	9.32049	1.15799e-20	2.95213e-19	chr8	70960912	70963451	-	NA
ENSMUSG00000021573.16	946.104	2.48281	0.266452	9.31804	1.18512e-20	3.01826e-19	chr13	74157525	74183872	+	NA
ENSMUSG00000043881.10	1249.13	1.02185	0.109669	9.31761	1.18995e-20	3.02754e-19	chr14	79663950	79668476	+	NA
ENSMUSG00000032607.13	1565.69	-0.890381	0.0955733	-9.31621	1.20568e-20	3.06451e-19	chr9	108174051	108179501	+	NA
ENSMUSG00000031079.13	41.6673	6.27617	0.673779	9.31489	1.22085e-20	3.09998e-19	chrX	20945412	20955766	-	NA
ENSMUSG00000020235.17	4179.67	-0.79412	0.0852722	-9.31276	1.24552e-20	3.15949e-19	chr10	81202055	81214350	-	NA
ENSMUSG00000022844.9	618.519	-1.10097	0.118252	-9.31033	1.27433e-20	3.22937e-19	chr16	35217681	35311243	-	NA
ENSMUSG00000041688.17	1053.28	-0.857684	0.0921646	-9.306	1.32733e-20	3.36032e-19	chrX	144229420	144288177	-	NA
ENSMUSG00000054021.7	146.281	-1.81736	0.195388	-9.30128	1.38769e-20	3.50965e-19	chr13	43518971	43548679	+	NA
ENSMUSG00000056608.15	2307.95	-0.781068	0.0839911	-9.29942	1.4122e-20	3.56812e-19	chr8	91554979	91781144	+	NA
ENSMUSG00000036712.16	1125.47	-0.963122	0.103602	-9.29635	1.4535e-20	3.66883e-19	chr8	89423655	89478573	+	NA
ENSMUSG00000031578.6	1049.18	-1.01197	0.108882	-9.29419	1.48328e-20	3.7403e-19	chr8	31649490	31658792	-	NA
ENSMUSG00000034795.15	53.2641	-8.75299	0.941834	-9.29356	1.49213e-20	3.75889e-19	chr14	77274211	77349697	+	NA
ENSMUSG00000015755.17	4043.86	-0.600154	0.0645912	-9.29157	1.52023e-20	3.82591e-19	chr10	7781416	7831994	-	NA
ENSMUSG00000033730.5	610.9	1.75045	0.188405	9.29087	1.53033e-20	3.84754e-19	chr14	70314651	70320063	+	NA
ENSMUSG00000035228.16	173.162	1.32489	0.142612	9.29012	1.5411e-20	3.87081e-19	chr7	5023551	5063784	+	NA
ENSMUSG00000074516.7	849.545	-0.891749	0.0961019	-9.2792	1.70751e-20	4.28457e-19	chr9	7751725	7752205	+	NA
ENSMUSG00000059866.14	542.164	0.770117	0.0830064	9.2778	1.73011e-20	4.337e-19	chr5	34653430	34671335	-	NA
ENSMUSG00000030337.17	600.854	1.11798	0.120508	9.2772	1.73992e-20	4.35732e-19	chr6	125192513	125222927	+	NA
ENSMUSG00000048755.10	838.091	-0.871775	0.0939721	-9.27695	1.74393e-20	4.36306e-19	chr15	83430997	83447988	-	NA
ENSMUSG00000120422.1	45.5087	6.40883	0.691004	9.27466	1.78181e-20	4.45347e-19	chr3	52375980	52399867	+	NA
ENSMUSG00000022587.16	87.5319	2.22692	0.240365	9.26475	1.95529e-20	4.87297e-19	chr15	74826899	74831752	+	NA
ENSMUSG00000045658.17	1366.33	1.28055	0.138216	9.26485	1.95351e-20	4.87297e-19	chr1	84014016	84341901	-	NA
ENSMUSG00000019979.13	1132.63	-0.796643	0.0859865	-9.26475	1.95538e-20	4.87297e-19	chr10	90825172	90918632	-	NA
ENSMUSG00000028150.15	174.066	2.31624	0.250126	9.26029	2.03876e-20	5.07581e-19	chr3	94280100	94305583	+	NA
ENSMUSG00000004872.16	48.551	-8.60353	0.929697	-9.25412	2.16002e-20	5.37246e-19	chr1	78077903	78173771	-	NA
ENSMUSG00000041263.15	193.025	-1.70784	0.184786	-9.24226	2.4135e-20	5.99709e-19	chr3	88991287	89000618	-	NA
ENSMUSG00000002963.18	1277.22	0.605058	0.0654769	9.24078	2.44696e-20	6.07432e-19	chr7	44506562	44512416	+	NA
ENSMUSG00000021594.12	1114.95	1.58422	0.171491	9.23789	2.514e-20	6.23467e-19	chr13	69721567	69759561	-	NA
ENSMUSG00000026245.17	2840.98	-0.999895	0.108245	-9.23731	2.52766e-20	6.26247e-19	chr1	78394611	78465534	-	NA
ENSMUSG00000037487.8	12470.7	-0.736992	0.0797921	-9.2364	2.5492e-20	6.30969e-19	chr15	37967571	38079098	-	NA
ENSMUSG00000022425.17	164.771	-1.93891	0.209968	-9.23428	2.60022e-20	6.42974e-19	chr15	54702296	54816288	-	NA
ENSMUSG00000031823.15	1689.85	-0.603143	0.065332	-9.23197	2.65702e-20	6.56384e-19	chr8	120807628	120828221	-	NA
ENSMUSG00000066554.7	147.664	-1.79992	0.195	-9.23038	2.69665e-20	6.6553e-19	chr5	148119708	148121187	-	NA
ENSMUSG00000023393.16	79.0865	2.05014	0.222137	9.22914	2.72808e-20	6.72635e-19	chr2	180367055	180384073	+	NA
ENSMUSG00000019874.12	50540	-1.68411	0.182538	-9.22608	2.80725e-20	6.91487e-19	chr10	57660976	57664546	+	NA
ENSMUSG00000022756.18	49.9803	2.14938	0.232999	9.22483	2.8402e-20	6.98929e-19	chr16	17389881	17401078	-	NA
ENSMUSG00000038552.15	1205.37	-1.14933	0.124599	-9.22419	2.85702e-20	7.02393e-19	chr5	31449585	31453424	-	NA
ENSMUSG00000038453.18	205.784	2.00246	0.217175	9.22053	2.95648e-20	7.26145e-19	chr11	97400165	97467012	-	NA
ENSMUSG00000050002.15	695.04	1.04598	0.113458	9.21911	2.99588e-20	7.35113e-19	chr13	58305462	58312507	+	NA
ENSMUSG00000051855.16	3965.25	-3.15789	0.342855	-9.21056	3.24427e-20	7.95298e-19	chr6	30723545	30748464	+	NA
ENSMUSG00000052920.17	52.4802	-8.71334	0.946027	-9.21045	3.24757e-20	7.95343e-19	chr19	30541888	31742433	-	NA
ENSMUSG00000034981.10	43.8065	-3.13999	0.341078	-9.20608	3.38253e-20	8.276e-19	chr5	91665473	91774753	+	NA
ENSMUSG00000052125.18	94.7117	1.5769	0.17131	9.20496	3.41814e-20	8.35512e-19	chr12	33161709	33197611	-	NA
ENSMUSG00000030706.18	1146.3	-0.729684	0.0792829	-9.20355	3.46327e-20	8.45733e-19	chr7	100194957	100257508	-	NA
ENSMUSG00000008690.16	7200.82	-0.819522	0.0890527	-9.20266	3.49189e-20	8.51907e-19	chr15	89239921	89257029	+	NA
ENSMUSG00000035517.18	2128.86	-1.05719	0.114903	-9.20072	3.55569e-20	8.66644e-19	chr4	45965333	46034761	+	NA
ENSMUSG00000061702.11	68.8788	1.81935	0.197887	9.19392	3.78792e-20	9.22365e-19	chr7	25368563	25374591	-	NA
ENSMUSG00000034880.8	2022.38	-0.941518	0.102417	-9.19299	3.82069e-20	9.29457e-19	chr8	71917602	71918391	+	NA
ENSMUSG00000015363.14	1612.44	-0.858282	0.0933718	-9.19208	3.85306e-20	9.3644e-19	chr15	88959326	88971280	+	NA
ENSMUSG00000038206.14	1252.55	-0.801659	0.0872513	-9.18793	4.00483e-20	9.71475e-19	chr8	57004124	57046974	+	NA
ENSMUSG00000019861.16	1799.62	-0.821667	0.0894288	-9.18795	4.00416e-20	9.71475e-19	chr10	52211945	52258220	-	NA
ENSMUSG00000042510.8	138.521	1.56653	0.170579	9.18362	4.16832e-20	1.01017e-18	chr1	130659712	130672359	+	NA
ENSMUSG00000053317.12	1797.11	-0.770706	0.0839231	-9.18349	4.17346e-20	1.01046e-18	chr4	47474657	47483242	+	NA
ENSMUSG00000061393.15	525.702	0.778327	0.08478	9.18054	4.28921e-20	1.0375e-18	chr9	119231183	119264061	+	NA
ENSMUSG00000029426.9	5842.04	0.963643	0.104974	9.17984	4.31752e-20	1.04267e-18	chr5	92589172	92654692	-	NA
ENSMUSG00000025128.8	32.3979	-8.619	0.938909	-9.1798	4.31876e-20	1.04267e-18	chr3	18108337	18111681	+	NA
ENSMUSG00000022240.11	8597.26	-1.05838	0.115355	-9.17491	4.51939e-20	1.09008e-18	chr15	30172738	31029487	+	NA
ENSMUSG00000026674.10	5965.42	-2.03836	0.222331	-9.16813	4.81311e-20	1.15983e-18	chr1	169799875	169938331	-	NA
ENSMUSG00000019863.8	516.98	-1.0981	0.119851	-9.1622	5.08498e-20	1.22418e-18	chr10	43750183	43777741	-	NA
ENSMUSG00000015341.18	2398.93	-0.713602	0.0779321	-9.15672	5.3498e-20	1.28673e-18	chr8	23731361	23747090	-	NA
ENSMUSG00000020289.16	982.294	-0.67313	0.0735792	-9.14838	5.77963e-20	1.3888e-18	chr11	32175627	32217707	-	NA
ENSMUSG00000031467.11	3562.73	-0.625437	0.0684418	-9.13823	6.34809e-20	1.52396e-18	chr8	18896292	18941377	+	NA
ENSMUSG00000034648.10	11508.5	1.27631	0.139798	9.12969	6.86974e-20	1.64764e-18	chr6	107506728	107547175	+	NA
ENSMUSG00000004040.17	16854.7	0.647861	0.0709662	9.12915	6.90385e-20	1.65427e-18	chr11	100775923	100830366	-	NA
ENSMUSG00000052488.8	5180.88	-0.62078	0.0680906	-9.11697	7.7252e-20	1.84934e-18	chr8	73214332	73229070	-	NA
ENSMUSG00000031534.16	456.574	-1.04938	0.115171	-9.1115	8.12474e-20	1.94316e-18	chr8	22952629	22966898	-	NA
ENSMUSG00000036790.6	1391.04	-1.23584	0.135663	-9.10966	8.26422e-20	1.97467e-18	chrX	65692923	65704999	+	NA
ENSMUSG00000008489.19	955.213	-0.927204	0.101802	-9.10795	8.39542e-20	2.00414e-18	chr4	91138999	91289022	-	NA
ENSMUSG00000014907.11	1622.52	-0.760745	0.0835632	-9.10383	8.72025e-20	2.07974e-18	chr8	67312868	67343216	+	NA
ENSMUSG00000034579.18	144.873	-1.81363	0.199266	-9.10152	8.90781e-20	2.12249e-18	chr11	3438283	3449350	+	NA
ENSMUSG00000000295.14	782.918	-1.12927	0.12408	-9.10118	8.9355e-20	2.1271e-18	chr10	31189378	31204200	+	NA
ENSMUSG00000026466.17	1991.81	0.5211	0.057267	9.09948	9.07636e-20	2.15862e-18	chr1	155880344	155912226	-	NA
ENSMUSG00000026527.14	1443	-1.27756	0.140423	-9.09794	9.20634e-20	2.18749e-18	chr1	174886652	175320066	-	NA
ENSMUSG00000033106.7	1934.35	-0.550093	0.060548	-9.08523	1.0348e-19	2.45647e-18	chr8	106927348	106937567	-	NA
ENSMUSG00000033938.6	2655.92	-0.835571	0.0919887	-9.08342	1.05218e-19	2.49541e-18	chr8	84293299	84298255	+	NA
ENSMUSG00000046191.8	177.528	1.22599	0.134975	9.08312	1.0551e-19	2.50001e-18	chr18	37637316	37640875	+	NA
ENSMUSG00000036053.18	7006.95	0.832595	0.091714	9.07817	1.10411e-19	2.61371e-18	chr2	52747871	53023816	+	NA
ENSMUSG00000028631.8	100.355	-2.19434	0.241755	-9.07671	1.11906e-19	2.64665e-18	chr4	120553334	120605809	-	NA
ENSMUSG00000037169.16	162.161	-2.04067	0.224853	-9.07555	1.13102e-19	2.67246e-18	chr12	12986093	12991915	-	NA
ENSMUSG00000030465.20	1751.21	-0.74175	0.0817477	-9.07365	1.15095e-19	2.71702e-18	chr8	68141733	68664679	-	NA
ENSMUSG00000022055.8	32.1295	-8.58832	0.94739	-9.06524	1.2433e-19	2.93233e-18	chr14	68321311	68326544	+	NA
ENSMUSG00000025478.16	35.0872	-8.73198	0.963335	-9.06432	1.25383e-19	2.95443e-18	chr7	138665916	138682620	+	NA
ENSMUSG00000103442.6	33.6635	-8.64897	0.954671	-9.05964	1.30884e-19	3.08121e-18	chr18	37063236	37320714	+	NA
ENSMUSG00000030268.18	3316.96	-1.6449	0.181602	-9.05775	1.33174e-19	3.13223e-18	chr6	144939560	145021910	-	NA
ENSMUSG00000045932.13	1328.4	-0.931958	0.102968	-9.05094	1.41742e-19	3.33068e-18	chr19	34528093	34553819	+	NA
ENSMUSG00000015968.19	54.1082	-2.64059	0.291767	-9.05034	1.42527e-19	3.34605e-18	chr14	29761895	30213412	-	NA
ENSMUSG00000036180.16	6421.3	-0.9528	0.105282	-9.04994	1.43042e-19	3.35504e-18	chr8	70359725	70449034	-	NA
ENSMUSG00000028277.14	3265.45	-0.545136	0.060249	-9.04806	1.45531e-19	3.41028e-18	chr4	33031415	33052363	+	NA
ENSMUSG00000026489.14	277.52	1.81403	0.200511	9.04702	1.46927e-19	3.43985e-18	chr1	179992802	180027167	-	NA
ENSMUSG00000038622.9	881.777	-0.920255	0.101771	-9.04245	1.53199e-19	3.58339e-18	chr15	52575803	52593960	+	NA
ENSMUSG00000022661.15	61.4875	-8.37961	0.927012	-9.03938	1.57564e-19	3.68213e-18	chr16	45202497	45229416	-	NA
ENSMUSG00000003762.14	407.198	1.0234	0.11338	9.02631	1.77553e-19	4.14545e-18	chr7	26932447	26957375	+	NA
ENSMUSG00000045657.4	807.245	0.859112	0.0952007	9.02422	1.80982e-19	4.22164e-18	chr18	37544716	37547567	+	NA
ENSMUSG00000097177.9	69.7869	1.60414	0.177768	9.02378	1.81716e-19	4.2349e-18	chr9	88722288	88740923	-	NA
ENSMUSG00000038372.15	306.562	-1.25743	0.139354	-9.02328	1.82545e-19	4.25032e-18	chr13	32003561	32522723	-	NA
ENSMUSG00000052534.16	5752.89	0.995838	0.110371	9.02262	1.83641e-19	4.27196e-18	chr1	167946932	168259839	-	NA
ENSMUSG00000048988.9	1750.59	1.06981	0.118607	9.01977	1.8849e-19	4.37938e-18	chr5	139893697	139960477	+	NA
ENSMUSG00000100706.8	41.4076	-8.38174	0.92927	-9.0197	1.88602e-19	4.37938e-18	chr8	49296511	49323573	+	NA
ENSMUSG00000016356.19	245.89	1.82946	0.202939	9.01485	1.97139e-19	4.57345e-18	chr2	180628327	180660156	+	NA
ENSMUSG00000022885.17	1076.52	1.12722	0.12515	9.00691	2.11948e-19	4.91255e-18	chr16	23043489	23179100	+	NA
ENSMUSG00000037415.8	2183.76	-0.551984	0.0612856	-9.00674	2.12272e-19	4.91558e-18	chr8	106494939	106553982	-	NA
ENSMUSG00000039911.14	529.129	1.35619	0.150611	9.00454	2.16573e-19	5.01064e-18	chr4	149980739	150039500	-	NA
ENSMUSG00000022296.11	25.9031	-3.38889	0.376377	-9.00397	2.17708e-19	5.03233e-18	chr15	38740783	38816307	+	NA
ENSMUSG00000031012.18	6260.47	-0.912225	0.101325	-9.00297	2.19702e-19	5.07382e-18	chrX	13383318	13717606	-	NA
ENSMUSG00000031967.16	3963.93	-0.815871	0.0906467	-9.00055	2.24582e-19	5.18183e-18	chr8	124204641	124230655	+	NA
ENSMUSG00000075271.5	53.5933	-7.62064	0.846816	-8.99917	2.2744e-19	5.24304e-18	chr2	75808590	75812311	-	NA
ENSMUSG00000019947.11	753.473	-1.06856	0.118743	-8.99896	2.27858e-19	5.24794e-18	chr10	67928349	68114570	-	NA
ENSMUSG00000062209.16	2145.82	1.75088	0.194713	8.99214	2.42462e-19	5.57926e-18	chr1	68071344	69147218	-	NA
ENSMUSG00000084277.2	55.2557	-7.65722	0.851573	-8.99186	2.43072e-19	5.58825e-18	chr11	115548316	115548385	-	NA
ENSMUSG00000050248.12	1097.84	-0.953112	0.106169	-8.97731	2.77473e-19	6.3734e-18	chr5	37495842	37582399	+	NA
ENSMUSG00000096753.8	148.886	-2.36211	0.263183	-8.97515	2.82959e-19	6.49354e-18	chr12	103277233	103283324	+	NA
ENSMUSG00000033249.11	24.8132	-3.99337	0.445224	-8.96933	2.98323e-19	6.83998e-18	chr8	105996432	106002477	+	NA
ENSMUSG00000036246.15	302.938	-1.08236	0.120738	-8.96451	3.11658e-19	7.13932e-18	chr8	70261328	70274520	+	NA
ENSMUSG00000037316.10	947.657	-0.9226	0.102956	-8.96107	3.21546e-19	7.35923e-18	chr8	26254565	26275315	-	NA
ENSMUSG00000031799.11	7935.99	-1.28919	0.143912	-8.95819	3.30058e-19	7.54726e-18	chr8	72884017	72906986	+	NA
ENSMUSG00000036779.13	2771.16	-0.800345	0.0894405	-8.94835	3.60829e-19	8.24351e-18	chr8	88925840	88986350	+	NA
ENSMUSG00000070565.12	3416.95	1.03264	0.115494	8.94111	3.8529e-19	8.79447e-18	chr1	156962751	157240165	-	NA
ENSMUSG00000024502.11	860.521	-1.17985	0.131961	-8.94095	3.85854e-19	8.79947e-18	chr18	43664471	43820838	-	NA
ENSMUSG00000035620.16	1526.17	-0.486118	0.0543721	-8.94059	3.87098e-19	8.81997e-18	chr10	84753479	84854201	+	NA
ENSMUSG00000048332.14	2253.3	1.31452	0.147085	8.93714	3.99355e-19	9.09112e-18	chr3	52948948	53169100	+	NA
ENSMUSG00000039385.6	1470.29	-1.44958	0.162232	-8.93524	4.06278e-19	9.24047e-18	chr15	13028786	13173761	-	NA
ENSMUSG00000071719.3	30.1267	-8.49904	0.951218	-8.93491	4.07516e-19	9.26038e-18	chrX	98864626	98892396	+	NA
ENSMUSG00000038602.8	1407.95	-1.34938	0.15107	-8.93214	4.17833e-19	9.48636e-18	chr10	52566628	52987718	+	NA
ENSMUSG00000034216.13	1689.04	0.566642	0.0635128	8.9217	4.59201e-19	1.04163e-17	chr2	119119220	119128934	+	NA
ENSMUSG00000002550.17	1547.06	0.76122	0.0853648	8.91725	4.77999e-19	1.08313e-17	chr2	32145013	32150171	-	NA
ENSMUSG00000009647.14	646.988	-1.04202	0.116855	-8.91717	4.78346e-19	1.08313e-17	chr10	59282805	59452514	-	NA
ENSMUSG00000035580.11	42.3219	-8.41688	0.94398	-8.91638	4.81791e-19	1.08997e-17	chr17	52909736	53286222	+	NA
ENSMUSG00000029790.17	727.257	-1.00148	0.112357	-8.91341	4.94859e-19	1.11854e-17	chr6	30653455	30693748	-	NA
ENSMUSG00000097156.9	15698.4	-1.02027	0.114483	-8.91193	5.0152e-19	1.13259e-17	chr3	88113836	88137268	+	NA
ENSMUSG00000014633.16	762.844	-1.57321	0.17656	-8.91032	5.08846e-19	1.14812e-17	chr8	117615423	117648194	-	NA
ENSMUSG00000029510.16	151.464	1.91526	0.215092	8.90437	5.36887e-19	1.21032e-17	chr5	138271916	138278267	-	NA
ENSMUSG00000022414.9	1490.83	-0.703889	0.0791	-8.89872	5.64949e-19	1.27246e-17	chr15	80017327	80045908	+	NA
ENSMUSG00000026778.14	1810.76	2.16362	0.243244	8.89483	5.85102e-19	1.31669e-17	chr2	11176918	11306033	+	NA
ENSMUSG00000036718.18	279.08	1.67837	0.188813	8.88904	6.16383e-19	1.38586e-17	chr5	139692450	139722091	-	NA
ENSMUSG00000055675.7	4351.1	-0.927635	0.104399	-8.88552	6.36252e-19	1.42927e-17	chr8	15061024	15083333	+	NA
ENSMUSG00000029086.16	93.728	5.56709	0.626679	8.88347	6.48046e-19	1.45448e-17	chr5	44150961	44259374	-	NA
ENSMUSG00000029851.6	30.5468	4.1013	0.461772	8.88165	6.58781e-19	1.47599e-17	chr6	42599949	42622188	-	NA
ENSMUSG00000022816.12	2444	1.10292	0.12418	8.88165	6.58786e-19	1.47599e-17	chr16	37597234	37656876	+	NA
ENSMUSG00000009681.11	2829.48	-0.769627	0.0866881	-8.87812	6.79998e-19	1.52218e-17	chr10	74896423	75020753	+	NA
ENSMUSG00000039206.14	699.932	0.879334	0.0990493	8.87774	6.82335e-19	1.52607e-17	chr5	143450338	143491697	+	NA
ENSMUSG00000026317.8	1845.98	-0.861237	0.0970148	-8.87737	6.84576e-19	1.52974e-17	chr8	14931334	14951720	+	NA
ENSMUSG00000078185.4	787.673	1.15178	0.129839	8.87086	7.25841e-19	1.62054e-17	chr1	175509802	175520467	-	NA
ENSMUSG00000030545.10	282.149	0.994969	0.112189	8.86867	7.40262e-19	1.65129e-17	chr7	79385704	79392879	-	NA
ENSMUSG00000021806.5	382.223	1.69698	0.191382	8.86696	7.51725e-19	1.67539e-17	chr14	19801332	19861855	+	NA
ENSMUSG00000015243.5	9815.72	2.20242	0.248589	8.85967	8.02549e-19	1.78711e-17	chr4	53030786	53159895	-	NA
ENSMUSG00000031879.15	1594.26	-0.829477	0.0936802	-8.85436	8.4168e-19	1.87261e-17	chr8	105366469	105368597	-	NA
ENSMUSG00000027784.11	4675.23	1.0245	0.115752	8.85082	8.68781e-19	1.93122e-17	chr3	69224193	69468135	+	NA
ENSMUSG00000035189.18	24.4434	-4.83789	0.546817	-8.84737	8.96084e-19	1.99018e-17	chr10	88784855	89180624	-	NA
ENSMUSG00000103653.2	142.208	-1.37616	0.15558	-8.84536	9.12365e-19	2.02458e-17	chr1	191758119	191758750	-	NA
ENSMUSG00000048218.7	30.0803	-8.48638	0.959452	-8.84503	9.15011e-19	2.02869e-17	chr15	97142005	97145168	-	NA
ENSMUSG00000020447.6	79.2383	2.57454	0.291112	8.84382	9.25032e-19	2.04912e-17	chr11	6161012	6180143	-	NA
ENSMUSG00000020522.14	3347.59	0.799747	0.0905204	8.83498	1.00113e-18	2.21577e-17	chr11	57409489	57424641	+	NA
ENSMUSG00000031916.18	1864.35	-0.579946	0.0656551	-8.83322	1.01705e-18	2.24905e-17	chr8	107772920	107783321	-	NA
ENSMUSG00000053441.6	238.314	2.12441	0.240505	8.83311	1.01803e-18	2.24928e-17	chr18	58969738	59187132	+	NA
ENSMUSG00000031995.10	41.6596	3.07991	0.348892	8.82767	1.06876e-18	2.35932e-17	chr9	31000697	31043149	-	NA
ENSMUSG00000025068.9	1302.98	0.860632	0.0975015	8.82686	1.07655e-18	2.37241e-17	chr19	47843408	47853229	+	NA
ENSMUSG00000099397.2	30.604	-2.49098	0.282204	-8.82687	1.07649e-18	2.37241e-17	chr17	22186481	22187223	-	NA
ENSMUSG00000023031.9	231.707	-1.64418	0.186479	-8.81695	1.1762e-18	2.58977e-17	chr15	100572301	100585802	-	NA
ENSMUSG00000070520.5	858.684	0.719506	0.0816121	8.81617	1.18447e-18	2.60572e-17	chr7	64516799	64522745	-	NA
ENSMUSG00000022191.17	5673.98	-0.686233	0.0778869	-8.81064	1.24437e-18	2.73514e-17	chr15	12824900	12935377	+	NA
ENSMUSG00000031232.18	2540.92	0.66435	0.0754138	8.8094	1.25818e-18	2.76313e-17	chrX	105011689	105055512	-	NA
ENSMUSG00000030347.7	771.296	-0.635339	0.0721344	-8.8077	1.27738e-18	2.80287e-17	chr6	126916924	126952930	+	NA
ENSMUSG00000016087.14	26.2264	-3.85394	0.437588	-8.80722	1.28284e-18	2.81243e-17	chr9	32333499	32454157	-	NA
ENSMUSG00000031627.10	1083.2	-0.824639	0.093638	-8.80667	1.28913e-18	2.8238e-17	chr8	47192766	47300493	+	NA
ENSMUSG00000027993.17	900.804	-1.207	0.137078	-8.80521	1.30606e-18	2.85843e-17	chr3	84067745	84214184	-	NA
ENSMUSG00000034781.6	5666.88	-0.665843	0.0756352	-8.80335	1.3279e-18	2.90374e-17	chr10	81364557	81381024	-	NA
ENSMUSG00000048644.9	2904.48	-1.15231	0.130916	-8.80191	1.34513e-18	2.9389e-17	chr8	4307659	4309274	-	NA
ENSMUSG00000061950.18	4066.39	-0.830593	0.0944186	-8.79692	1.40621e-18	3.06972e-17	chr17	66089567	66148921	+	NA
ENSMUSG00000074829.11	143.101	1.04745	0.119126	8.79281	1.45869e-18	3.18157e-17	chr9	124054433	124075326	-	NA
ENSMUSG00000004446.13	309.516	-1.80663	0.205496	-8.79155	1.4751e-18	3.21461e-17	chr6	120868890	120893814	-	NA
ENSMUSG00000051255.7	989.202	-1.11627	0.127001	-8.7894	1.50364e-18	3.27402e-17	chr19	23653211	23653844	+	NA
ENSMUSG00000037594.12	345.963	0.935328	0.106421	8.78893	1.50991e-18	3.28486e-17	chr12	112772556	112779872	+	NA
ENSMUSG00000030741.16	2171.24	0.830318	0.0945187	8.7847	1.56786e-18	3.40803e-17	chr7	125969231	125976622	-	NA
ENSMUSG00000078349.5	658.242	1.18202	0.134572	8.78357	1.58368e-18	3.43949e-17	chr4	156287726	156295020	+	NA
ENSMUSG00000022415.13	806.993	-0.887679	0.101071	-8.78275	1.59531e-18	3.4618e-17	chr15	79975534	80003702	+	NA
ENSMUSG00000048126.17	41.1545	-3.92951	0.447548	-8.78008	1.63353e-18	3.54171e-17	chr1	90693644	90771693	-	NA
ENSMUSG00000036880.11	2109.55	0.916733	0.104428	8.77859	1.65531e-18	3.58589e-17	chr18	74912267	74939279	+	NA
ENSMUSG00000032231.15	204.836	1.8007	0.205151	8.77746	1.67204e-18	3.61907e-17	chr9	69360901	69399077	+	NA
ENSMUSG00000043061.11	687.776	-0.748685	0.0854538	-8.76128	1.93044e-18	4.17483e-17	chr12	30634424	30641214	+	NA
ENSMUSG00000022305.14	1370.06	-0.642629	0.0733525	-8.76084	1.93809e-18	4.18781e-17	chr15	39733984	39807390	-	NA
ENSMUSG00000054423.15	233.914	-1.96986	0.224854	-8.76062	1.94171e-18	4.1921e-17	chr14	9646683	10097200	+	NA
ENSMUSG00000092312.2	30.7942	3.54879	0.405126	8.7597	1.95763e-18	4.22289e-17	chr7	9061358	9065753	-	NA
ENSMUSG00000019897.9	1721.62	-0.565389	0.0645817	-8.75463	2.04775e-18	4.41356e-17	chr10	105676927	105683694	+	NA
ENSMUSG00000099632.3	100.393	1.50915	0.17239	8.75425	2.05461e-18	4.4246e-17	chr2	163261686	163262288	+	NA
ENSMUSG00000048949.9	450.123	1.24836	0.142655	8.75088	2.11697e-18	4.55506e-17	chrX	102206715	102209013	-	NA
ENSMUSG00000026837.17	195.879	-1.47017	0.168034	-8.74928	2.14714e-18	4.61608e-17	chr2	27776436	27929526	+	NA
ENSMUSG00000025787.7	46.6812	1.95742	0.223852	8.74425	2.24502e-18	4.82244e-17	chr9	122863790	122896626	+	NA
ENSMUSG00000031596.16	890.165	-1.27978	0.146468	-8.73762	2.38072e-18	5.10964e-17	chr8	41315432	41375345	+	NA
ENSMUSG00000000915.16	2234.36	1.05972	0.121299	8.73641	2.40626e-18	5.16011e-17	chr5	124111690	124143621	+	NA
ENSMUSG00000034936.3	318.832	2.00514	0.229518	8.7363	2.40877e-18	5.16117e-17	chr11	101556366	101558658	+	NA
ENSMUSG00000022369.14	1223.43	-0.952867	0.109097	-8.7341	2.45601e-18	5.25796e-17	chr15	55420803	55489819	+	NA
ENSMUSG00000020793.6	185.684	1.6072	0.184077	8.7311	2.52213e-18	5.39341e-17	chr11	116171764	116174764	+	NA
ENSMUSG00000037820.16	47.7435	-2.74035	0.313863	-8.73104	2.52351e-18	5.39341e-17	chr2	157958321	157988356	-	NA
ENSMUSG00000109462.2	24.9627	-5.49515	0.629448	-8.7301	2.54439e-18	5.4335e-17	chr8	4828041	4828269	+	NA
ENSMUSG00000044676.11	29.2915	-8.46967	0.970877	-8.72374	2.69172e-18	5.74332e-17	chr8	110806377	110819373	+	NA
ENSMUSG00000034220.8	4806.47	0.747986	0.0857655	8.7213	2.75029e-18	5.86338e-17	chr1	92759366	92788501	+	NA
ENSMUSG00000024824.8	362.427	-1.16265	0.133324	-8.72048	2.77021e-18	5.90091e-17	chr19	4245194	4251661	-	NA
ENSMUSG00000047766.16	961.544	-0.647474	0.0742868	-8.71586	2.88552e-18	6.14141e-17	chr9	60476141	60595441	-	NA
ENSMUSG00000038732.16	144.315	-2.925	0.335627	-8.71502	2.907e-18	6.18197e-17	chr13	30320471	30430700	+	NA
ENSMUSG00000052698.16	1840.08	-0.639689	0.0734476	-8.70945	3.05343e-18	6.48796e-17	chr9	67124368	67466985	-	NA
ENSMUSG00000025348.11	1003.02	1.43253	0.164481	8.70935	3.05627e-18	6.48859e-17	chr10	128769644	128794155	+	NA
ENSMUSG00000061731.10	3005.3	-0.710008	0.0815382	-8.70768	3.10171e-18	6.57959e-17	chr15	52927433	53209555	-	NA
ENSMUSG00000039704.9	1626.3	-0.65684	0.0754447	-8.70624	3.14114e-18	6.65769e-17	chr15	9140636	9202569	+	NA
ENSMUSG00000043531.17	1227.14	-1.78484	0.205234	-8.69661	3.41954e-18	7.24176e-17	chr19	50131736	50667084	-	NA
ENSMUSG00000044600.15	3251.02	-0.731375	0.0841076	-8.69571	3.44665e-18	7.29312e-17	chr8	73319031	73324932	-	NA
ENSMUSG00000073177.9	49.8277	6.85325	0.788788	8.68833	3.678e-18	7.77621e-17	chrX	55235186	55258241	-	NA
ENSMUSG00000070576.5	355.448	-1.1857	0.136708	-8.67324	4.19985e-18	8.87218e-17	chr5	111565227	111604899	+	NA
ENSMUSG00000042903.9	952.753	-2.26923	0.26167	-8.67212	4.24163e-18	8.95302e-17	chrX	100298133	100304479	+	NA
ENSMUSG00000023087.16	1490.78	0.8325	0.0960253	8.66959	4.33689e-18	9.14655e-17	chr3	51131867	51159065	+	NA
ENSMUSG00000081137.4	93.2741	1.44887	0.167181	8.66646	4.45749e-18	9.39313e-17	chrX	168151184	168152999	+	NA
ENSMUSG00000024725.14	1361.82	-0.870934	0.100508	-8.66528	4.50387e-18	9.48302e-17	chr19	18493500	18609187	-	NA
ENSMUSG00000023827.9	949.273	0.825354	0.0953101	8.65967	4.73127e-18	9.9536e-17	chr17	12337590	12438532	+	NA
ENSMUSG00000115969.2	51.016	1.88773	0.218021	8.65848	4.78104e-18	1.005e-16	chr15	75503817	75507759	-	NA
ENSMUSG00000063698.10	217.002	-1.45507	0.168067	-8.65768	4.81483e-18	1.01044e-16	chr19	60825714	60849917	-	NA
ENSMUSG00000032456.14	34.3325	-8.11399	0.937198	-8.6577	4.81361e-18	1.01044e-16	chr9	98169487	98302491	+	NA
ENSMUSG00000035274.14	151.537	-1.7898	0.206741	-8.65719	4.83543e-18	1.01393e-16	chr9	85724432	85729093	+	NA
ENSMUSG00000048612.17	36.1219	-3.96951	0.458642	-8.65493	4.93195e-18	1.03332e-16	chr19	37887483	38032025	-	NA
ENSMUSG00000041235.13	13368.5	1.20792	0.139621	8.65142	5.08613e-18	1.06475e-16	chr4	8690405	8867659	+	NA
ENSMUSG00000027314.7	27.3789	2.96791	0.343103	8.65019	5.14131e-18	1.07542e-16	chr2	119156264	119166443	+	NA
ENSMUSG00000037754.14	1728.03	1.72247	0.199131	8.64996	5.15165e-18	1.0767e-16	chr2	158507317	158608254	+	NA
ENSMUSG00000038178.17	556.672	-1.19848	0.138561	-8.6495	5.17234e-18	1.07925e-16	chr11	75422519	75468401	+	NA
ENSMUSG00000063239.18	72.2708	-2.10607	0.243488	-8.64956	5.16967e-18	1.07925e-16	chr17	27641360	27740377	-	NA
ENSMUSG00000032348.7	37.8585	-2.27386	0.262973	-8.64674	5.2993e-18	1.10484e-16	chr9	78090055	78116631	+	NA
ENSMUSG00000031796.8	3018.24	-0.984888	0.113932	-8.64456	5.40124e-18	1.12518e-16	chr8	96146876	96161497	-	NA
ENSMUSG00000034889.9	2311.21	-0.716157	0.0829148	-8.63726	5.75752e-18	1.19842e-16	chr10	81156936	81162076	+	NA
ENSMUSG00000026077.16	22.5479	-4.73963	0.548804	-8.63629	5.80688e-18	1.20771e-16	chr1	39232811	39402317	+	NA
ENSMUSG00000050628.7	3241.13	0.576594	0.0667841	8.63371	5.93948e-18	1.23428e-16	chr11	116324919	116329903	+	NA
ENSMUSG00000031701.7	9577.21	-0.740513	0.0857803	-8.63267	5.99377e-18	1.24455e-16	chr8	86264261	86281973	-	NA
ENSMUSG00000031583.14	974.189	-1.02922	0.119229	-8.63231	6.01273e-18	1.24747e-16	chr8	33724411	33875555	-	NA
ENSMUSG00000062991.10	54.6533	-7.63233	0.885133	-8.6228	6.5336e-18	1.35443e-16	chr8	32304578	33374825	-	NA
ENSMUSG00000035478.15	8735.74	-0.854449	0.0991121	-8.62104	6.63504e-18	1.37435e-16	chr10	80228372	80235384	-	NA
ENSMUSG00000019433.10	3607.66	-0.88447	0.10262	-8.61885	6.76289e-18	1.39856e-16	chr8	84379305	84391323	+	NA
ENSMUSG00000030339.8	1243.93	-1.33631	0.155044	-8.61892	6.75872e-18	1.39856e-16	chr6	125283533	125290848	-	NA
ENSMUSG00000039637.16	1270.82	1.00473	0.116577	8.61858	6.779e-18	1.40076e-16	chr16	4443996	4497641	-	NA
ENSMUSG00000078427.4	1609	-0.835671	0.0970204	-8.61335	7.0958e-18	1.46503e-16	chr10	128653201	128713498	+	NA
ENSMUSG00000121596.1	209.14	1.25141	0.145358	8.60916	7.35963e-18	1.51827e-16	chr5	110014593	110031560	+	NA
ENSMUSG00000040078.10	905.422	-0.931125	0.108174	-8.60769	7.4549e-18	1.53668e-16	chr6	85820961	85821441	+	NA
ENSMUSG00000021364.17	618.631	-1.15221	0.13386	-8.60755	7.46375e-18	1.53727e-16	chr13	41335856	41373881	-	NA
ENSMUSG00000022742.7	1352.39	-0.726536	0.0844084	-8.60739	7.47399e-18	1.53814e-16	chr16	58490654	58537999	+	NA
ENSMUSG00000004098.8	209.396	-1.95813	0.227499	-8.6072	7.48658e-18	1.53948e-16	chr9	20681345	20726363	-	NA
ENSMUSG00000079215.9	7249.62	0.56868	0.0661119	8.60179	7.84835e-18	1.61258e-16	chr5	124939754	124979757	+	NA
ENSMUSG00000079003.4	2041.39	-1.13201	0.131612	-8.60111	7.89502e-18	1.62086e-16	chr8	84724129	84727038	+	NA
ENSMUSG00000002043.18	723.485	1.21793	0.141657	8.59778	8.12762e-18	1.66727e-16	chr7	19242319	19250070	+	NA
ENSMUSG00000033713.13	2876.1	0.91202	0.106089	8.59678	8.1983e-18	1.68042e-16	chr12	99156336	99529841	-	NA
ENSMUSG00000069072.10	28.9208	-5.6879	0.66173	-8.59551	8.28994e-18	1.69784e-16	chr3	31257006	31364527	-	NA
ENSMUSG00000003746.17	202.237	-1.35527	0.157718	-8.59302	8.47113e-18	1.73356e-16	chr10	53780880	53952705	-	NA
ENSMUSG00000004558.16	5876.06	-1.86678	0.217289	-8.5912	8.60688e-18	1.75993e-16	chr14	52142727	52151615	-	NA
ENSMUSG00000031137.18	44.6643	-7.34511	0.854996	-8.59081	8.63596e-18	1.76446e-16	chrX	58107504	58613431	-	NA
ENSMUSG00000022325.15	1626.52	-1.24347	0.144781	-8.58864	8.80073e-18	1.79669e-16	chr15	34495449	34530794	+	NA
ENSMUSG00000011837.5	2186.44	-0.963261	0.112211	-8.58437	9.13372e-18	1.86318e-16	chr8	4303079	4306220	+	NA
ENSMUSG00000052087.15	102.033	4.84696	0.564765	8.58225	9.30358e-18	1.89631e-16	chr13	55517544	55532500	+	NA
ENSMUSG00000044788.11	47.251	-2.37216	0.276495	-8.5794	9.53723e-18	1.94238e-16	chr11	115170447	115188489	-	NA
ENSMUSG00000096999.2	23.9901	-3.69963	0.431594	-8.57202	1.01682e-17	2.06924e-16	chr7	144448296	144451198	-	NA
ENSMUSG00000036934.10	481.879	-1.06222	0.123934	-8.57089	1.02687e-17	2.08803e-16	chr8	86135387	86159462	-	NA
ENSMUSG00000037725.9	3272.54	-0.953552	0.111303	-8.56715	1.0608e-17	2.15529e-16	chr8	22658175	22675835	-	NA
ENSMUSG00000037868.16	730.636	1.18886	0.13879	8.56591	1.07225e-17	2.17683e-16	chr10	67371304	67378018	+	NA
ENSMUSG00000090066.3	34.7705	2.70271	0.316329	8.54397	1.29684e-17	2.63069e-16	chr3	137770812	137787267	+	NA
ENSMUSG00000019777.17	10336.2	-0.851054	0.0996191	-8.54307	1.30697e-17	2.64913e-16	chr10	36850539	36877885	+	NA
ENSMUSG00000020163.13	2689.41	-0.782928	0.0916632	-8.54136	1.3265e-17	2.68659e-16	chr10	80238830	80242664	-	NA
ENSMUSG00000019838.12	83.863	-1.62652	0.190501	-8.53812	1.36427e-17	2.76089e-16	chr10	39909527	40018254	-	NA
ENSMUSG00000057229.12	443.19	0.778105	0.0911365	8.5378	1.36798e-17	2.7662e-16	chr7	25318838	25324976	+	NA
ENSMUSG00000066800.12	507.944	1.54833	0.181381	8.53631	1.38572e-17	2.79986e-16	chr1	153625171	153639967	+	NA
ENSMUSG00000104671.2	85.8136	1.5256	0.178747	8.535	1.40158e-17	2.82966e-16	chr3	102978489	102979808	+	NA
ENSMUSG00000026457.15	4687.95	0.720881	0.084486	8.53255	1.43157e-17	2.88793e-16	chr1	134343115	134361089	+	NA
ENSMUSG00000022339.10	447.351	-0.934526	0.10954	-8.53136	1.44643e-17	2.9156e-16	chr15	44482570	44504911	+	NA
ENSMUSG00000022247.13	2591.69	-0.73509	0.0861868	-8.52904	1.47568e-17	2.97221e-16	chr15	10474864	10486033	-	NA
ENSMUSG00000039217.14	476.38	-1.46808	0.172253	-8.52284	1.55692e-17	3.13336e-16	chr9	50466126	50493140	+	NA
ENSMUSG00000042312.11	27.6466	-4.18894	0.491576	-8.52146	1.5756e-17	3.16846e-16	chr3	90421741	90431888	+	NA
ENSMUSG00000038510.13	1522.17	-1.07764	0.126483	-8.52003	1.59509e-17	3.20512e-16	chr10	40099241	40123032	-	NA
ENSMUSG00000068220.7	13261.6	-1.20258	0.141163	-8.51911	1.60787e-17	3.22827e-16	chr15	78810924	78814665	+	NA
ENSMUSG00000034801.14	1496.76	0.668063	0.0784496	8.51582	1.65409e-17	3.31845e-16	chr12	69630535	69728626	-	NA
ENSMUSG00000064080.13	990.283	1.52244	0.178851	8.51234	1.70455e-17	3.417e-16	chr6	91189436	91249522	+	NA
ENSMUSG00000019763.12	654.716	-0.816747	0.0960281	-8.50529	1.8114e-17	3.62835e-16	chr10	4351914	4382388	-	NA
ENSMUSG00000020297.11	5701.82	1.25498	0.14756	8.50488	1.81789e-17	3.63849e-16	chr11	31950462	32009202	+	NA
ENSMUSG00000029843.5	50.8543	1.91229	0.224894	8.50308	1.84626e-17	3.69237e-16	chr6	35244891	35285066	-	NA
ENSMUSG00000037058.17	4918.62	0.664463	0.0781451	8.50293	1.84857e-17	3.69409e-16	chr18	35731669	35750240	+	NA
ENSMUSG00000021319.8	114.403	-1.35036	0.158829	-8.50197	1.86396e-17	3.72194e-16	chr13	19807273	19817164	+	NA
ENSMUSG00000014856.13	1209.87	-0.69023	0.0811921	-8.50119	1.8765e-17	3.74404e-16	chr8	106052985	106061851	+	NA
ENSMUSG00000037070.11	5529.47	-1.09409	0.128722	-8.49962	1.9022e-17	3.79237e-16	chr8	79231897	79235527	-	NA
ENSMUSG00000026698.9	749.068	0.613438	0.0722102	8.49517	1.97639e-17	3.93719e-16	chr1	161796754	161801004	+	NA
ENSMUSG00000097881.9	746.64	0.7571	0.0891832	8.48926	2.07948e-17	4.13934e-16	chr1	121015115	121106170	+	NA
ENSMUSG00000036820.13	665.014	0.958069	0.11288	8.4875	2.11138e-17	4.19956e-16	chr17	24374806	24382740	-	NA
ENSMUSG00000024486.7	1450.09	1.54165	0.181664	8.48628	2.13359e-17	4.24043e-16	chr18	36637979	36648858	-	NA
ENSMUSG00000052446.18	593.062	-1.25133	0.147549	-8.48077	2.23708e-17	4.44265e-16	chr8	72704881	72747636	+	NA
ENSMUSG00000036112.16	11190.2	-0.602731	0.071073	-8.48045	2.24332e-17	4.45157e-16	chr10	93694350	93732955	-	NA
ENSMUSG00000019782.11	1110.29	-1.12011	0.132084	-8.48026	2.24695e-17	4.45531e-16	chr10	33872550	33895620	-	NA
ENSMUSG00000033578.8	1119.43	-0.885505	0.104465	-8.47658	2.31917e-17	4.59495e-16	chrX	133195973	133206718	+	NA
ENSMUSG00000057778.15	375.029	0.915057	0.107966	8.47541	2.34244e-17	4.63744e-16	chr11	72668057	72686968	-	NA
ENSMUSG00000024087.5	53.7061	2.52692	0.298223	8.47325	2.3863e-17	4.72061e-16	chr17	80008965	80022490	-	NA
ENSMUSG00000028744.16	418.401	0.979739	0.115672	8.46996	2.45481e-17	4.85238e-16	chr4	139021339	139038019	-	NA
ENSMUSG00000049336.17	399.67	-1.86398	0.220125	-8.46783	2.50007e-17	4.93803e-16	chr11	35897482	37126791	-	NA
ENSMUSG00000115317.3	42.7668	-1.88585	0.22274	-8.4666	2.52668e-17	4.98673e-16	chr15	32779001	32796155	+	NA
ENSMUSG00000036442.9	2250.47	-0.588359	0.0694967	-8.466	2.53959e-17	5.00832e-16	chr8	106581763	106583582	+	NA
ENSMUSG00000027895.11	53.6028	-2.0873	0.246685	-8.46138	2.64235e-17	5.20696e-16	chr3	107345618	107366868	-	NA
ENSMUSG00000068874.14	676.856	1.75907	0.208074	8.45405	2.81378e-17	5.5405e-16	chr3	94840366	94852069	+	NA
ENSMUSG00000022848.9	1653.93	0.969264	0.114694	8.45084	2.89206e-17	5.69025e-16	chr16	35514431	35589726	-	NA
ENSMUSG00000015149.15	4000.23	0.891177	0.10546	8.45037	2.90374e-17	5.70882e-16	chr7	28466159	28488086	+	NA
ENSMUSG00000028369.16	219.819	-1.63351	0.193333	-8.4492	2.93294e-17	5.76179e-16	chr4	58042441	58206859	-	NA
ENSMUSG00000013878.19	620.084	-0.834544	0.0988034	-8.44651	3.0014e-17	5.89174e-16	chr8	26609395	26641818	+	NA
ENSMUSG00000035845.18	503.783	-1.26462	0.149736	-8.44567	3.02317e-17	5.92992e-16	chr15	88689446	88703521	-	NA
ENSMUSG00000032434.10	1859.6	0.623526	0.0738867	8.43894	3.20221e-17	6.27629e-16	chr9	114560183	114578412	+	NA
ENSMUSG00000020250.12	11202.5	-0.66209	0.0784603	-8.43853	3.21358e-17	6.29374e-16	chr10	82669784	82733546	+	NA
ENSMUSG00000094786.2	87.461	1.53008	0.181366	8.43643	3.27179e-17	6.40283e-16	chr2	177190007	177201556	+	NA
ENSMUSG00000100334.2	40.4296	2.45242	0.290702	8.4362	3.27815e-17	6.41035e-16	chr1	153596985	153613575	-	NA
ENSMUSG00000024776.19	1541.47	-1.20986	0.143469	-8.43287	3.37277e-17	6.59032e-16	chr19	34169628	34217733	+	NA
ENSMUSG00000047904.7	27.5248	-2.50552	0.297138	-8.43219	3.39248e-17	6.62376e-16	chr11	113510167	113516854	+	NA
ENSMUSG00000043496.8	1650.77	-1.28135	0.152024	-8.42865	3.49686e-17	6.82236e-16	chr6	53792452	53797815	-	NA
ENSMUSG00000047759.7	23.424	-8.14987	0.967452	-8.42406	3.63658e-17	7.08952e-16	chr11	64326157	64413667	+	NA
ENSMUSG00000040540.7	331.856	-0.939124	0.111514	-8.4216	3.71366e-17	7.23426e-16	chr10	130248367	130249178	+	NA
ENSMUSG00000031782.16	2673.32	-0.592958	0.0704475	-8.41703	3.86165e-17	7.51682e-16	chr8	95564948	95581523	+	NA
ENSMUSG00000052551.17	22.6259	-5.33646	0.634061	-8.41632	3.88505e-17	7.55659e-16	chr13	8252901	8818783	+	NA
ENSMUSG00000090693.5	25.9123	3.15671	0.375138	8.4148	3.93561e-17	7.64912e-16	chr9	88462943	88470872	+	NA
ENSMUSG00000006386.16	30.1201	3.55507	0.42273	8.40979	4.10739e-17	7.9769e-16	chr4	94627525	94763213	+	NA
ENSMUSG00000108616.3	914.445	-1.24347	0.147875	-8.40891	4.13854e-17	8.03129e-16	chr7	79185759	79209781	+	NA
ENSMUSG00000045790.11	312.837	-2.12928	0.253317	-8.4056	4.25673e-17	8.25437e-16	chr5	52531992	52628863	-	NA
ENSMUSG00000000384.16	3062.6	-0.550247	0.0654634	-8.40542	4.26331e-17	8.26086e-16	chr11	6565597	6576067	-	NA
ENSMUSG00000044708.6	27305.8	0.758467	0.0902625	8.4029	4.35604e-17	8.43412e-16	chr1	172168776	172201652	+	NA
ENSMUSG00000095315.4	160.632	1.14342	0.136103	8.40115	4.42128e-17	8.55395e-16	chr2	150153350	150168932	+	NA
ENSMUSG00000121179.1	680.49	-3.27774	0.390269	-8.39868	4.51519e-17	8.72902e-16	chr6	30782686	30785779	+	NA
ENSMUSG00000097141.3	313.99	0.987272	0.117587	8.39607	4.61677e-17	8.91865e-16	chr18	82710408	82712301	+	NA
ENSMUSG00000028519.17	2502.61	-0.691321	0.0823454	-8.39538	4.64385e-17	8.96419e-16	chr4	103476555	104602041	+	NA
ENSMUSG00000008845.10	642.152	0.868736	0.103508	8.3929	4.7431e-17	9.14883e-16	chr6	124281614	124307486	+	NA
ENSMUSG00000022322.9	1860.59	-1.53452	0.182896	-8.39011	4.85673e-17	9.36094e-16	chr8	4785975	4829567	-	NA
ENSMUSG00000022634.10	2053.72	-0.871628	0.103918	-8.38763	4.96058e-17	9.55389e-16	chr15	93182158	93234816	-	NA
ENSMUSG00000025227.15	463.377	-0.955602	0.113976	-8.38422	5.10641e-17	9.82734e-16	chr19	46329559	46363691	+	NA
ENSMUSG00000025027.19	4383.01	-0.538282	0.0642067	-8.38357	5.13451e-17	9.87397e-16	chr19	52920356	53028645	-	NA
ENSMUSG00000044197.9	438.328	1.7554	0.209438	8.38148	5.22653e-17	1.00434e-15	chr5	139363451	139382170	+	NA
ENSMUSG00000044976.18	21.8999	3.6377	0.434027	8.38128	5.23539e-17	1.00528e-15	chr9	74017637	74190590	+	NA
ENSMUSG00000031697.13	1697.28	-1.2312	0.147028	-8.37389	5.57472e-17	1.06963e-15	chr8	86026260	86034907	+	NA
ENSMUSG00000022829.15	31.2579	-2.89794	0.346307	-8.36812	5.85464e-17	1.1225e-15	chr16	36935303	37205324	-	NA
ENSMUSG00000004319.16	5633.72	-0.956947	0.114389	-8.36573	5.97452e-17	1.14462e-15	chr8	61363422	61436334	-	NA
ENSMUSG00000020171.9	2078.11	-0.680884	0.0814048	-8.36418	6.05335e-17	1.15837e-15	chr10	117051125	117060412	-	NA
ENSMUSG00000043090.19	1625.69	-0.885116	0.105823	-8.36414	6.05537e-17	1.15837e-15	chr8	70213975	70243828	-	NA
ENSMUSG00000050079.11	1629.48	-0.663441	0.0793257	-8.36351	6.08786e-17	1.16372e-15	chr8	95328564	95386903	+	NA
ENSMUSG00000035776.15	1500.18	0.77969	0.0932882	8.35787	6.38618e-17	1.21983e-15	chrX	70463665	70536455	-	NA
ENSMUSG00000033705.18	1782.36	0.942914	0.112831	8.35685	6.44136e-17	1.22945e-15	chr2	120459601	120562376	+	NA
ENSMUSG00000028128.14	1455.84	-0.578103	0.069197	-8.35445	6.5741e-17	1.25385e-15	chr3	121517185	121528697	+	NA
ENSMUSG00000062232.15	2658.52	-0.678685	0.0812467	-8.35338	6.63351e-17	1.26423e-15	chr3	78969822	79193824	-	NA
ENSMUSG00000031027.16	27.7834	-7.80689	0.93553	-8.34488	7.1285e-17	1.35755e-15	chr7	108878429	109038288	-	NA
ENSMUSG00000020151.17	55.3848	-1.83846	0.220331	-8.34409	7.17651e-17	1.36568e-15	chr10	115854117	116110837	+	NA
ENSMUSG00000094344.2	662.8	-0.744271	0.0893077	-8.33378	7.83026e-17	1.48897e-15	chr4	32964887	32965232	+	NA
ENSMUSG00000047719.3	702.754	-0.896842	0.107636	-8.33214	7.9391e-17	1.50855e-15	chr4	148518951	148529228	-	NA
ENSMUSG00000058748.10	496.08	-0.861836	0.103455	-8.33056	8.04618e-17	1.52713e-15	chr8	4663166	4680231	+	NA
ENSMUSG00000040521.12	1055.64	-0.951473	0.114215	-8.33052	8.04888e-17	1.52713e-15	chr10	126847440	126866709	-	NA
ENSMUSG00000039234.12	1913.99	-1.05545	0.126731	-8.32827	8.20296e-17	1.55521e-15	chr3	123061103	123159290	+	NA
ENSMUSG00000018415.15	1826	0.626347	0.0752225	8.32659	8.32063e-17	1.57635e-15	chr11	60307970	60341753	+	NA
ENSMUSG00000053552.15	924.05	0.863737	0.103766	8.32388	8.51314e-17	1.61162e-15	chr2	130137088	130212401	+	NA
ENSMUSG00000021453.3	1384.95	-0.96526	0.116098	-8.31418	9.2385e-17	1.74764e-15	chr13	52000713	52002504	+	NA
ENSMUSG00000040663.10	107.985	2.84299	0.342174	8.30861	9.68282e-17	1.83034e-15	chr19	4264291	4273544	+	NA
ENSMUSG00000031671.12	358.951	1.2321	0.14831	8.30761	9.76469e-17	1.84445e-15	chr8	96442508	96445638	+	NA
ENSMUSG00000055447.20	1759.51	-0.594519	0.0716148	-8.30162	1.02702e-16	1.93849e-15	chr16	49620895	49735373	+	NA
ENSMUSG00000017478.16	6762.6	-0.724911	0.0873273	-8.30107	1.03175e-16	1.94599e-15	chr8	123103347	123144099	+	NA
ENSMUSG00000032224.16	191.535	-1.43867	0.173462	-8.29387	1.09618e-16	2.06599e-15	chr9	69995792	70049842	-	NA
ENSMUSG00000017132.18	1626.16	0.774779	0.0934306	8.29256	1.10835e-16	2.08738e-15	chr11	118022844	118139418	-	NA
ENSMUSG00000038984.5	19.7877	-7.90718	0.953539	-8.29246	1.10931e-16	2.08765e-15	chr15	33684020	33688030	-	NA
ENSMUSG00000060657.9	2902.81	0.577664	0.0696629	8.29228	1.11096e-16	2.0892e-15	chr16	13927036	13981215	-	NA
ENSMUSG00000004996.10	1593.44	-0.904416	0.109071	-8.29201	1.11352e-16	2.09248e-15	chr8	84976534	84983955	-	NA
ENSMUSG00000041653.6	48.4063	-2.18755	0.26382	-8.29182	1.11529e-16	2.09426e-15	chr15	84052037	84071437	+	NA
ENSMUSG00000022321.16	730.124	-1.34759	0.162649	-8.28525	1.17857e-16	2.21146e-15	chr15	18819032	19014322	+	NA
ENSMUSG00000034361.11	689.762	-0.819293	0.0989545	-8.27949	1.23702e-16	2.31943e-15	chr8	95259617	95297159	+	NA
ENSMUSG00000055932.16	5282.27	-0.541258	0.0653776	-8.27895	1.24263e-16	2.32824e-15	chr8	92040152	92395067	+	NA
ENSMUSG00000053436.16	2355.21	-0.636275	0.076896	-8.27449	1.29009e-16	2.4154e-15	chr17	28910302	28967380	+	NA
ENSMUSG00000062661.7	1204.24	0.87862	0.106204	8.27296	1.30673e-16	2.44398e-15	chr2	31135834	31186001	+	NA
ENSMUSG00000019261.4	4870.45	-0.521273	0.0630096	-8.27291	1.30727e-16	2.44398e-15	chr8	71358575	71370173	+	NA
ENSMUSG00000031790.9	28462.4	-1.46632	0.177252	-8.27251	1.31163e-16	2.45033e-15	chr8	96078895	96101708	+	NA
ENSMUSG00000029804.18	751.26	-1.09794	0.132836	-8.2654	1.39225e-16	2.59903e-15	chr6	58808449	58897383	+	NA
ENSMUSG00000032737.14	5580.61	0.625917	0.0757326	8.26483	1.39894e-16	2.60962e-15	chr7	101471838	101487436	-	NA
ENSMUSG00000026028.13	2924.24	-0.510311	0.0617573	-8.26317	1.41852e-16	2.64421e-15	chr1	58939607	59012589	-	NA
ENSMUSG00000044167.7	452.105	-2.20906	0.267344	-8.263	1.42056e-16	2.64607e-15	chr3	52175756	52260642	+	NA
ENSMUSG00000064246.11	88.8747	-2.05508	0.248737	-8.26203	1.4322e-16	2.66581e-15	chr1	134109913	134117919	+	NA
ENSMUSG00000043441.6	29.0154	-7.87227	0.953063	-8.25997	1.45708e-16	2.71014e-15	chr3	62436497	62512561	-	NA
ENSMUSG00000058966.14	247.156	-1.65489	0.200442	-8.25621	1.50367e-16	2.79476e-15	chr7	126396839	126429391	+	NA
ENSMUSG00000098009.2	37.9792	-2.06029	0.249616	-8.25383	1.53401e-16	2.84908e-15	chr7	75894493	75895686	-	NA
ENSMUSG00000028927.7	95.5894	-2.50349	0.303427	-8.25072	1.57438e-16	2.92194e-15	chr4	140633654	140679897	+	NA
ENSMUSG00000019891.16	980.91	-0.822421	0.0996815	-8.25049	1.57747e-16	2.92553e-15	chr10	52109714	52197474	+	NA
ENSMUSG00000037012.19	6281.81	-0.741979	0.0899592	-8.24795	1.61134e-16	2.98618e-15	chr10	62104633	62215687	-	NA
ENSMUSG00000020076.8	2999.23	-0.587241	0.0711999	-8.24778	1.61359e-16	2.98819e-15	chr10	62451673	62486997	-	NA
ENSMUSG00000103183.2	238.661	1.48033	0.179487	8.24756	1.61657e-16	2.99154e-15	chr4	156103012	156107117	-	NA
ENSMUSG00000039899.6	72.8554	1.75141	0.212388	8.24628	1.63405e-16	3.02169e-15	chr5	21577639	21583372	+	NA
ENSMUSG00000097623.9	27.6591	-4.50022	0.545771	-8.24561	1.64315e-16	3.03631e-15	chr9	69666021	69738127	+	NA
ENSMUSG00000022422.14	324.498	-1.30706	0.158956	-8.2228	1.98799e-16	3.67087e-15	chr15	54939494	54953887	-	NA
ENSMUSG00000037151.9	529.806	-0.947073	0.115196	-8.2214	2.01137e-16	3.71136e-15	chr10	61311579	61418570	+	NA
ENSMUSG00000023495.14	5693.94	1.00245	0.121962	8.21932	2.04657e-16	3.77359e-15	chr9	106330489	106341211	+	NA
ENSMUSG00000028048.12	1406.54	0.65156	0.0792892	8.21752	2.07759e-16	3.82802e-15	chr3	89110234	89116273	+	NA
ENSMUSG00000036904.7	335.521	1.46044	0.177798	8.21401	2.13914e-16	3.93573e-15	chr18	9212162	9218136	+	NA
ENSMUSG00000027952.17	1225.98	-1.21574	0.148008	-8.21404	2.13876e-16	3.93573e-15	chr3	89361847	89376320	+	NA
ENSMUSG00000045039.10	5668.58	0.679478	0.0827487	8.21134	2.18725e-16	4.02136e-15	chr7	25016588	25065342	+	NA
ENSMUSG00000028862.7	86.5136	1.33615	0.162733	8.21073	2.19846e-16	4.03905e-15	chr4	132968128	132980240	+	NA
ENSMUSG00000038143.17	9381.81	-0.883003	0.107568	-8.20883	2.23357e-16	4.10061e-15	chr8	47633082	47899397	-	NA
ENSMUSG00000002602.17	283.1	1.31631	0.160385	8.20715	2.26506e-16	4.15543e-15	chr7	25456697	25488130	-	NA
ENSMUSG00000085609.3	23.016	-3.45266	0.420723	-8.20649	2.27747e-16	4.1752e-15	chr11	75063384	75068464	+	NA
ENSMUSG00000043668.14	2329.08	-1.03425	0.126061	-8.2043	2.31936e-16	4.24835e-15	chr8	90973667	91074971	-	NA
ENSMUSG00000063727.4	18.109	-7.77156	0.947263	-8.20423	2.3207e-16	4.24835e-15	chr15	54114014	54141880	-	NA
ENSMUSG00000024521.9	18.6261	-7.7984	0.950812	-8.20184	2.36743e-16	4.33078e-15	chr18	66591603	66598636	+	NA
ENSMUSG00000019878.9	1862.89	-0.569346	0.0694466	-8.19832	2.43767e-16	4.45609e-15	chr10	57362480	57389231	+	NA
ENSMUSG00000051343.12	346.192	-1.23878	0.151149	-8.1958	2.4894e-16	4.54739e-15	chr6	85311943	85351616	-	NA
ENSMUSG00000031691.15	4347.81	-0.770711	0.09408	-8.19208	2.56757e-16	4.68682e-15	chr8	85763543	85784212	+	NA
ENSMUSG00000032316.9	1829.7	0.502613	0.0613561	8.19173	2.57492e-16	4.69688e-15	chr9	57657906	57673143	-	NA
ENSMUSG00000053137.8	480.79	-1.02699	0.125377	-8.19118	2.58679e-16	4.71517e-15	chr15	89026688	89033831	-	NA
ENSMUSG00000019539.12	302.824	-1.58642	0.193708	-8.18972	2.61825e-16	4.7691e-15	chr7	44732336	44741645	-	NA
ENSMUSG00000022853.8	23.0307	-5.36376	0.655032	-8.18854	2.64413e-16	4.81282e-15	chr16	21580036	21606557	-	NA
ENSMUSG00000027712.14	2502.16	-3.40177	0.415685	-8.18353	2.75658e-16	5.0139e-15	chr3	36503071	36530043	-	NA
ENSMUSG00000036315.14	625.387	-0.678883	0.0829783	-8.18146	2.8043e-16	5.09707e-15	chr17	37265247	37269451	-	NA
ENSMUSG00000019470.13	3919.22	-0.545537	0.0667016	-8.17876	2.86769e-16	5.20857e-15	chr8	3658420	3671316	-	NA
ENSMUSG00000036964.15	77.1406	1.46006	0.178649	8.17277	3.01398e-16	5.4704e-15	chr11	58845510	58863924	+	NA
ENSMUSG00000072875.3	386.288	1.5492	0.189634	8.16939	3.09952e-16	5.62166e-15	chr6	99669639	99672027	+	NA
ENSMUSG00000070047.15	13529	-0.650246	0.0795962	-8.1693	3.10178e-16	5.62175e-15	chr8	45388483	45505294	+	NA
ENSMUSG00000032269.9	453.361	1.90072	0.232731	8.16701	3.16122e-16	5.72543e-15	chr9	48810512	48822399	-	NA
ENSMUSG00000025077.15	762.678	-0.631806	0.0773774	-8.16525	3.20778e-16	5.80564e-15	chr19	56517598	56536675	-	NA
ENSMUSG00000036902.12	4525.9	-0.777022	0.0952263	-8.15974	3.35739e-16	6.0721e-15	chr8	86363216	86427553	-	NA
ENSMUSG00000044456.17	34.0671	-3.56201	0.436545	-8.15955	3.3628e-16	6.07757e-15	chr12	102249306	102357114	+	NA
ENSMUSG00000047632.12	400.611	0.866772	0.106246	8.15817	3.40145e-16	6.14307e-15	chr19	36894949	36897015	-	NA
ENSMUSG00000034171.14	1238.35	1.32712	0.162694	8.15713	3.43076e-16	6.19162e-15	chr4	115824341	115875123	-	NA
ENSMUSG00000034390.17	2906.69	-0.444919	0.0545547	-8.15546	3.47844e-16	6.27324e-15	chr8	117983802	118186169	+	NA
ENSMUSG00000022658.11	2071.51	0.989424	0.121333	8.15459	3.50379e-16	6.3145e-15	chr16	45531592	45544971	-	NA
ENSMUSG00000030089.16	240.379	-1.35313	0.165948	-8.15394	3.52242e-16	6.34359e-15	chr6	90581706	90623394	+	NA
ENSMUSG00000020882.18	359.496	0.85746	0.105174	8.15281	3.55574e-16	6.39907e-15	chr11	97892333	97913860	-	NA
ENSMUSG00000027679.14	943.667	-0.624528	0.0766037	-8.15272	3.55836e-16	6.39928e-15	chr3	34110168	34135470	-	NA
ENSMUSG00000074733.15	598.8	1.26409	0.155053	8.15262	3.56123e-16	6.39993e-15	chr19	61042277	61129278	-	NA
ENSMUSG00000020629.13	391.662	0.775824	0.0951981	8.14957	3.65212e-16	6.55865e-15	chr12	28725229	28732174	+	NA
ENSMUSG00000097140.2	78.7605	1.34083	0.164594	8.14628	3.75302e-16	6.73512e-15	chr5	110034096	110039003	+	NA
ENSMUSG00000055681.15	5118.01	-0.535805	0.0657798	-8.14544	3.77918e-16	6.77729e-15	chr8	70755167	70765643	+	NA
ENSMUSG00000022360.9	3963.5	-1.11633	0.137063	-8.14468	3.8028e-16	6.81486e-15	chr15	57957439	57998478	-	NA
ENSMUSG00000003752.10	306.31	0.860382	0.105692	8.14043	3.93883e-16	7.05368e-15	chr7	26906596	26928086	-	NA
ENSMUSG00000046058.8	861.298	-0.866722	0.106477	-8.13998	3.95329e-16	7.07462e-15	chr7	27967305	27968697	+	NA
ENSMUSG00000059336.15	21.5392	-3.37652	0.414877	-8.1386	3.99885e-16	7.15113e-15	chr18	78143305	78185334	-	NA
ENSMUSG00000015112.16	34.6271	-5.57258	0.684922	-8.13607	4.08304e-16	7.29658e-15	chr6	6041217	6217173	-	NA
ENSMUSG00000032860.6	133.424	3.95856	0.486567	8.13569	4.09614e-16	7.31487e-15	chr7	100645774	100662073	-	NA
ENSMUSG00000004788.12	2495.06	0.673058	0.0827652	8.13214	4.21792e-16	7.52707e-15	chr12	85266254	85273402	+	NA
ENSMUSG00000051934.6	3025.91	-0.691287	0.0850713	-8.12597	4.43796e-16	7.91421e-15	chr15	99023796	99111096	+	NA
ENSMUSG00000078546.9	74.5536	1.7353	0.213615	8.12349	4.52983e-16	8.0724e-15	chr17	22098550	22128907	-	NA
ENSMUSG00000073600.6	1182.64	1.1902	0.146609	8.1182	4.73141e-16	8.42574e-15	chr18	35783403	35788291	-	NA
ENSMUSG00000071226.12	775.131	0.832282	0.102611	8.11107	5.01767e-16	8.92928e-15	chr6	120643329	120748151	+	NA
ENSMUSG00000027669.15	1808.75	-1.18181	0.145715	-8.11043	5.04392e-16	8.96974e-15	chr3	32634480	32670734	-	NA
ENSMUSG00000000127.16	1132.83	-0.987837	0.12187	-8.10568	5.24525e-16	9.32128e-15	chr17	64170056	64446491	+	NA
ENSMUSG00000006219.13	36.0064	-3.39639	0.419119	-8.10363	5.33411e-16	9.46874e-15	chr4	141303372	141333407	-	NA
ENSMUSG00000039313.15	20.1195	-7.91452	0.976668	-8.1036	5.33565e-16	9.46874e-15	chr9	89469268	89505178	-	NA
ENSMUSG00000052605.13	18.6648	-4.84234	0.597564	-8.10347	5.34147e-16	9.47249e-15	chr7	4847957	4873257	-	NA
ENSMUSG00000062861.9	450.418	0.934096	0.115289	8.10218	5.39831e-16	9.56663e-15	chr7	6386293	6399914	+	NA
ENSMUSG00000020091.16	11482.9	-0.449689	0.0555108	-8.10092	5.45429e-16	9.65913e-15	chr10	61264269	61288440	-	NA
ENSMUSG00000025025.15	2269.13	0.993653	0.122708	8.09769	5.6012e-16	9.90555e-15	chr19	53298948	53364241	+	NA
ENSMUSG00000027546.16	547.832	-2.12706	0.262673	-8.09774	5.59889e-16	9.90555e-15	chr2	168476357	168584329	-	NA
ENSMUSG00000044734.17	43.7051	2.89159	0.357178	8.09566	5.69547e-16	1.0062e-14	chr13	33026074	33035168	-	NA
ENSMUSG00000055116.9	711.96	-1.36687	0.16884	-8.09562	5.69754e-16	1.0062e-14	chr7	112806671	112913333	+	NA
ENSMUSG00000040952.17	16075.3	0.575568	0.0710984	8.09536	5.70933e-16	1.00758e-14	chr7	24583795	24589231	+	NA
ENSMUSG00000026782.16	4593.66	-0.457131	0.0564753	-8.09435	5.75689e-16	1.01527e-14	chr1	60448777	60520317	+	NA
ENSMUSG00000020048.14	15080.3	-0.930143	0.114961	-8.09092	5.92139e-16	1.04356e-14	chr10	86526072	86541373	-	NA
ENSMUSG00000048038.9	43.6539	3.50668	0.433454	8.09008	5.96274e-16	1.05013e-14	chr2	26133480	26184569	-	NA
ENSMUSG00000022895.17	1512.86	1.23454	0.152605	8.08973	5.97969e-16	1.05238e-14	chr16	95502941	95522095	+	NA
ENSMUSG00000003039.10	5504.27	-0.543806	0.0672527	-8.08601	6.16491e-16	1.08423e-14	chr8	72973573	72978262	+	NA
ENSMUSG00000020063.17	1312.65	-0.689711	0.0853124	-8.08453	6.24021e-16	1.09672e-14	chr10	63154783	63217483	-	NA
ENSMUSG00000095865.2	62.7137	-1.94883	0.241082	-8.08369	6.28378e-16	1.10362e-14	chr4	146648909	146649544	-	NA
ENSMUSG00000032388.8	1266.45	0.85562	0.105848	8.08348	6.29458e-16	1.10476e-14	chr9	65368228	65395752	+	NA
ENSMUSG00000035242.16	14303.6	-0.849357	0.105129	-8.07921	6.51898e-16	1.14335e-14	chr10	80662489	80665124	+	NA
ENSMUSG00000019768.17	19.4444	-3.94765	0.488713	-8.07765	6.60291e-16	1.15728e-14	chr10	4561592	4955614	+	NA
ENSMUSG00000026672.12	377.558	1.114	0.137917	8.07729	6.62231e-16	1.15988e-14	chr2	5025452	5068862	-	NA
ENSMUSG00000038884.15	35.9211	-7.60598	0.941885	-8.07527	6.73253e-16	1.17838e-14	chr9	20779937	20785603	+	NA
ENSMUSG00000002797.10	295.509	0.899769	0.111459	8.07262	6.88032e-16	1.20342e-14	chr6	54959564	54969935	-	NA
ENSMUSG00000004677.19	4987.04	-0.587459	0.0727828	-8.0714	6.94976e-16	1.21473e-14	chr8	71725357	71813357	+	NA
ENSMUSG00000053930.14	17.0889	-7.68251	0.952079	-8.06919	7.0767e-16	1.23607e-14	chr11	66102550	66416790	-	NA
ENSMUSG00000120777.1	69.7912	1.89434	0.234814	8.0674	7.18133e-16	1.25349e-14	chr16	36585467	36590490	-	NA
ENSMUSG00000112134.2	21.8053	4.78083	0.592858	8.06404	7.38114e-16	1.28749e-14	chr10	83180376	83186943	+	NA
ENSMUSG00000111293.2	17.9335	-7.76937	0.963858	-8.0607	7.58578e-16	1.32228e-14	chr10	42737377	42740695	-	NA
ENSMUSG00000098923.2	1004.07	0.824455	0.102306	8.05875	7.70781e-16	1.34263e-14	chr1	119453889	119456713	+	NA
ENSMUSG00000045871.6	83.4928	-2.17251	0.269642	-8.05701	7.81817e-16	1.36093e-14	chr14	110986011	110992581	-	NA
ENSMUSG00000097842.3	100.989	1.37473	0.170671	8.05487	7.95636e-16	1.38215e-14	chr7	16605271	16608811	-	NA
ENSMUSG00000026788.14	1415.76	0.710113	0.0881591	8.0549	7.95448e-16	1.38215e-14	chr2	33340298	33358571	-	NA
ENSMUSG00000020205.9	1275.1	-0.800965	0.0994386	-8.05487	7.95612e-16	1.38215e-14	chr10	111342146	111344506	+	NA
ENSMUSG00000024197.11	114.251	1.83184	0.227521	8.05129	8.19229e-16	1.42217e-14	chr17	56584475	56599873	-	NA
ENSMUSG00000039458.16	1221.97	-0.734504	0.0912354	-8.05064	8.23603e-16	1.42879e-14	chr15	12205113	12274582	+	NA
ENSMUSG00000120091.1	23.5853	-7.55483	0.938897	-8.0465	8.51939e-16	1.47694e-14	chr12	111469404	111471526	-	NA
ENSMUSG00000024908.16	7171.53	-0.430732	0.053533	-8.0461	8.54716e-16	1.48075e-14	chr19	3504927	3625749	-	NA
ENSMUSG00000045757.7	35.1503	-7.01012	0.871378	-8.04487	8.6336e-16	1.49471e-14	chr7	127002839	127005994	-	NA
ENSMUSG00000024870.7	4862.37	-0.546001	0.0678748	-8.04424	8.67832e-16	1.50144e-14	chr19	5149232	5157100	-	NA
ENSMUSG00000046567.11	421.707	-0.776702	0.0966489	-8.03633	9.2569e-16	1.60045e-14	chr10	100408126	100426285	-	NA
ENSMUSG00000019917.11	2116.04	-0.766336	0.0953705	-8.03535	9.33115e-16	1.6122e-14	chr10	58977448	59057669	-	NA
ENSMUSG00000039646.6	436.013	-1.34731	0.167685	-8.03475	9.37685e-16	1.619e-14	chr16	4457804	4468666	+	NA
ENSMUSG00000040938.17	17.4254	-7.72657	0.961734	-8.03399	9.43508e-16	1.62795e-14	chr11	70103577	70107243	+	NA
ENSMUSG00000044716.13	942.872	1.21862	0.151711	8.03246	9.55408e-16	1.64737e-14	chr5	35214109	35245183	+	NA
ENSMUSG00000059851.16	1719.82	-0.629422	0.0783958	-8.02877	9.84535e-16	1.69645e-14	chr7	4743113	4750513	+	NA
ENSMUSG00000097828.3	40.8643	-1.98295	0.247022	-8.02742	9.95476e-16	1.71414e-14	chr13	99533431	99549384	-	NA
ENSMUSG00000114349.2	109.056	-1.49351	0.186073	-8.02645	1.00331e-15	1.72647e-14	chr14	26932353	26933206	+	NA
ENSMUSG00000032504.16	4781.98	0.399813	0.0498305	8.02347	1.02801e-15	1.76778e-14	chr9	113480811	113537327	-	NA
ENSMUSG00000036167.17	2409.69	-0.923322	0.115091	-8.02254	1.0358e-15	1.77998e-14	chr15	93296230	93389391	+	NA
ENSMUSG00000021983.17	52.2619	2.41877	0.301595	8.01993	1.05802e-15	1.81694e-14	chr14	59875988	60434628	-	NA
ENSMUSG00000028341.10	500.163	1.52651	0.190381	8.01819	1.07319e-15	1.84174e-14	chr4	48045152	48086447	+	NA
ENSMUSG00000023942.16	1931.22	-1.19139	0.148606	-8.0171	1.08269e-15	1.8568e-14	chr17	45896125	45910532	-	NA
ENSMUSG00000045667.15	53.1452	-1.76248	0.219858	-8.01648	1.08821e-15	1.86501e-14	chr11	72279989	72302539	-	NA
ENSMUSG00000014859.10	2368.83	-0.738065	0.0921072	-8.0131	1.11849e-15	1.91562e-14	chr8	106024294	106032002	+	NA
ENSMUSG00000020052.10	2259.1	-1.11452	0.139097	-8.01249	1.1241e-15	1.92394e-14	chr10	87326680	87329522	-	NA
ENSMUSG00000033356.4	550.131	-1.19154	0.148717	-8.01213	1.1274e-15	1.92829e-14	chr15	94420568	94441428	-	NA
ENSMUSG00000082691.7	1947.28	-0.771267	0.0962938	-8.00951	1.15163e-15	1.96841e-14	chr6	135326405	135326747	-	NA
ENSMUSG00000026185.9	3951.61	-1.32471	0.165467	-8.00586	1.18631e-15	2.02633e-14	chr1	72897090	72914043	-	NA
ENSMUSG00000039623.14	953.642	0.633235	0.0791004	8.00547	1.19014e-15	2.03151e-14	chr5	142449698	142464465	+	NA
ENSMUSG00000110080.3	691.155	1.85319	0.231494	8.00534	1.1914e-15	2.03221e-14	chr14	105858448	105881159	-	NA
ENSMUSG00000034349.15	6383.06	-0.909677	0.113635	-8.00526	1.19214e-15	2.03221e-14	chr3	68912070	68941956	+	NA
ENSMUSG00000029755.11	25.5831	-5.77344	0.721276	-8.00448	1.19972e-15	2.04377e-14	chr6	6877804	6882085	-	NA
ENSMUSG00000020180.11	4787.16	-0.77608	0.0970005	-8.00078	1.2363e-15	2.10467e-14	chr10	75353384	75373215	+	NA
ENSMUSG00000097280.2	87.4616	-1.29163	0.161454	-8.00001	1.24412e-15	2.11658e-14	chr3	88106408	88111902	-	NA
ENSMUSG00000026429.10	732.346	1.12633	0.140817	7.99854	1.25906e-15	2.14057e-14	chr1	134890302	134901900	+	NA
ENSMUSG00000056602.14	343.49	-4.06289	0.508129	-7.99578	1.28758e-15	2.1876e-14	chr5	150042109	150421218	+	NA
ENSMUSG00000033161.11	22100.3	0.812216	0.101591	7.99494	1.29641e-15	2.20113e-14	chr3	101483534	101512000	-	NA
ENSMUSG00000052364.5	299.038	1.07879	0.134981	7.99211	1.32653e-15	2.25077e-14	chrX	8758620	8761203	+	NA
ENSMUSG00000005087.18	2728.19	1.25551	0.157146	7.98948	1.35505e-15	2.29764e-14	chr2	102641485	102732010	-	NA
ENSMUSG00000006373.11	4047.77	0.548761	0.0687043	7.98728	1.3795e-15	2.33755e-14	chrX	35861858	35869732	+	NA
ENSMUSG00000097493.4	149.669	-1.56831	0.196519	-7.98043	1.4583e-15	2.46944e-14	chr15	60694119	60703642	+	NA
ENSMUSG00000114025.2	60.3295	-1.61404	0.202365	-7.97588	1.51297e-15	2.56032e-14	chr12	17952389	17954676	+	NA
ENSMUSG00000056904.4	83.068	-1.53618	0.192673	-7.97296	1.54917e-15	2.61983e-14	chr9	90979201	90980549	+	NA
ENSMUSG00000002608.9	1842.61	0.538767	0.0675787	7.97244	1.55567e-15	2.62909e-14	chr7	25410530	25418513	-	NA
ENSMUSG00000026349.15	3493.63	0.694238	0.0871074	7.96991	1.58789e-15	2.68176e-14	chr1	127701900	127735798	+	NA
ENSMUSG00000019796.13	2496.04	-0.851243	0.106813	-7.96948	1.59345e-15	2.68937e-14	chr10	7465563	7501247	+	NA
ENSMUSG00000042942.19	30.2717	-3.06137	0.384279	-7.96651	1.63213e-15	2.75283e-14	chr18	10325176	10562940	+	NA
ENSMUSG00000042541.11	4053.59	-0.872731	0.109556	-7.9661	1.63759e-15	2.76022e-14	chr6	6557293	6578663	-	NA
ENSMUSG00000063568.12	171.198	-1.01726	0.127716	-7.965	1.65219e-15	2.78298e-14	chr6	52745781	53045616	-	NA
ENSMUSG00000050994.21	23.6101	-2.99687	0.376455	-7.96076	1.7099e-15	2.8783e-14	chr10	10211446	10348070	-	NA
ENSMUSG00000060639.6	998.074	-1.15061	0.144707	-7.95135	1.84489e-15	3.10348e-14	chr13	22224805	22225532	-	NA
ENSMUSG00000031826.21	5184.05	-1.03137	0.129723	-7.95058	1.85645e-15	3.12087e-14	chr8	120637098	120684299	+	NA
ENSMUSG00000025175.13	30.5507	2.92421	0.367841	7.94965	1.8704e-15	3.14224e-14	chr11	121325738	121341317	+	NA
ENSMUSG00000022241.7	7209.28	-1.17716	0.148084	-7.94931	1.87546e-15	3.14868e-14	chr15	11382386	11399751	-	NA
ENSMUSG00000103454.2	26.6377	7.46387	0.939036	7.94844	1.8888e-15	3.16899e-14	chr3	52332828	52333069	+	NA
ENSMUSG00000025466.20	81.0354	-1.34384	0.169081	-7.94792	1.89661e-15	3.18001e-14	chr7	139676682	139682354	-	NA
ENSMUSG00000044813.16	369.777	1.16199	0.146203	7.94778	1.89877e-15	3.18153e-14	chr4	45423277	45532470	-	NA
ENSMUSG00000030209.15	22.5112	-5.61503	0.706575	-7.94682	1.91357e-15	3.20422e-14	chr6	135690230	136150509	-	NA
ENSMUSG00000041907.10	27.0436	-2.45605	0.309073	-7.9465	1.91858e-15	3.21052e-14	chr1	42992031	43074616	+	NA
ENSMUSG00000019558.15	2885.11	0.827663	0.10423	7.94076	2.00946e-15	3.36038e-14	chrX	72716755	72726108	+	NA
ENSMUSG00000032609.13	163.032	-1.32778	0.167331	-7.93507	2.10377e-15	3.51579e-14	chr9	108324834	108338780	-	NA
ENSMUSG00000026029.15	33.3318	-8.07326	1.01748	-7.93457	2.1122e-15	3.52756e-14	chr1	58834532	58886662	+	NA
ENSMUSG00000051319.7	720.952	-0.857942	0.108183	-7.9305	2.18269e-15	3.64292e-14	chr2	127633307	127634408	-	NA
ENSMUSG00000039601.17	586.758	1.41723	0.178715	7.9301	2.18967e-15	3.65217e-14	chr17	44112241	44350407	+	NA
ENSMUSG00000024308.16	855.011	0.768419	0.0969203	7.92836	2.2206e-15	3.70133e-14	chr17	34134872	34148266	+	NA
ENSMUSG00000039480.15	289.313	-1.29193	0.163031	-7.92445	2.29151e-15	3.81704e-14	chr10	34164283	34294548	-	NA
ENSMUSG00000070283.5	470.365	-0.923789	0.116716	-7.91484	2.47562e-15	4.12102e-14	chr9	108442735	108444633	-	NA
ENSMUSG00000043487.5	22.8268	-5.97051	0.754416	-7.91409	2.49077e-15	4.14355e-14	chr12	84147427	84158123	+	NA
ENSMUSG00000022263.11	8919.62	-0.782914	0.0989717	-7.91048	2.56398e-15	4.26256e-14	chr15	27730736	28025934	-	NA
ENSMUSG00000026037.15	1697.34	-0.835274	0.105592	-7.91036	2.56647e-15	4.26392e-14	chr1	58501929	58544268	-	NA
ENSMUSG00000036368.9	25.2508	-7.65267	0.967666	-7.90837	2.60779e-15	4.32974e-14	chr17	79919291	80000621	+	NA
ENSMUSG00000048440.17	787.601	0.783546	0.0990838	7.90791	2.61743e-15	4.34292e-14	chr17	32755531	32770772	+	NA
ENSMUSG00000018143.11	471.844	0.901925	0.114062	7.90732	2.62999e-15	4.36093e-14	chr5	139777267	139788408	+	NA
ENSMUSG00000100891.2	27.7598	-2.27631	0.287901	-7.90658	2.64548e-15	4.38377e-14	chr13	84039326	84076829	+	NA
ENSMUSG00000020089.9	2561.66	-1.1695	0.147961	-7.90407	2.69952e-15	4.47041e-14	chr10	61484330	61509947	+	NA
ENSMUSG00000039067.6	6242.24	-0.792342	0.100261	-7.90281	2.72692e-15	4.51285e-14	chr8	108307012	108315096	-	NA
ENSMUSG00000071072.13	5250.03	-0.841772	0.106536	-7.90132	2.75954e-15	4.56389e-14	chr10	127894822	127913141	+	NA
ENSMUSG00000022300.11	2139.05	-0.64424	0.0815448	-7.90044	2.77911e-15	4.59327e-14	chr15	38976259	39010251	+	NA
ENSMUSG00000027506.16	2247.23	0.646157	0.081808	7.89846	2.82373e-15	4.664e-14	chr3	8990652	9069783	-	NA
ENSMUSG00000014932.16	1363.21	0.733635	0.0929099	7.89619	2.87547e-15	4.74639e-14	chr5	32768514	32844401	+	NA
ENSMUSG00000040729.9	21.8274	-7.44744	0.943523	-7.89322	2.94495e-15	4.85792e-14	chr9	8076461	8134295	-	NA
ENSMUSG00000019773.8	1513.71	-1.20091	0.152182	-7.8913	2.99065e-15	4.93013e-14	chr10	5749159	5755600	-	NA
ENSMUSG00000062981.6	2984.27	-0.981082	0.124328	-7.89109	2.99553e-15	4.93499e-14	chr10	95316666	95337802	-	NA
ENSMUSG00000023143.11	561.787	1.20706	0.152995	7.8895	3.0339e-15	4.99498e-14	chr16	5013152	5021876	-	NA
ENSMUSG00000020211.16	3318.48	-0.572911	0.072621	-7.88905	3.04487e-15	5.0098e-14	chr10	80634031	80640758	+	NA
ENSMUSG00000032643.13	385.724	-1.41607	0.179546	-7.88694	3.09695e-15	5.0922e-14	chr4	124594493	124602404	+	NA
ENSMUSG00000033491.14	22.341	3.73111	0.47309	7.88669	3.10318e-15	5.09916e-14	chr9	86625701	86640496	+	NA
ENSMUSG00000072941.6	85.3945	-1.93209	0.245021	-7.88541	3.13501e-15	5.14815e-14	chr5	52521132	52528760	+	NA
ENSMUSG00000109901.3	530.222	0.897247	0.113796	7.88468	3.15338e-15	5.17498e-14	chr18	67338436	67340960	+	NA
ENSMUSG00000027574.16	213.089	-0.864608	0.109733	-7.87923	3.29413e-15	5.4025e-14	chr2	180576564	180596492	-	NA
ENSMUSG00000104597.2	261.779	1.23685	0.157066	7.87474	3.41441e-15	5.59617e-14	chr3	157772822	157781749	-	NA
ENSMUSG00000011179.9	6994.45	-0.869757	0.110479	-7.87257	3.47433e-15	5.69073e-14	chr12	17594794	17601506	+	NA
ENSMUSG00000033159.15	2103.06	0.912257	0.115966	7.86661	3.6437e-15	5.96431e-14	chr1	75111197	75119355	-	NA
ENSMUSG00000059897.6	429.19	-0.963907	0.122536	-7.86629	3.65304e-15	5.97577e-14	chr8	69661689	69683188	+	NA
ENSMUSG00000045319.14	18.9176	-4.63617	0.589555	-7.86385	3.72507e-15	6.08968e-14	chr2	6102417	6135022	-	NA
ENSMUSG00000031483.9	3619.12	-0.602016	0.0765589	-7.86344	3.73734e-15	6.10584e-14	chr8	27513288	27530356	+	NA
ENSMUSG00000117499.2	195.911	1.14578	0.145823	7.85734	3.9237e-15	6.40619e-14	chr17	95122168	95123491	-	NA
ENSMUSG00000114203.2	17.6542	-4.56598	0.581121	-7.8572	3.92825e-15	6.40953e-14	chr13	99130658	99133926	+	NA
ENSMUSG00000114311.3	18.8427	3.43865	0.437793	7.8545	4.01363e-15	6.54465e-14	chr13	107200184	107235752	+	NA
ENSMUSG00000053347.16	257.29	0.753998	0.0960479	7.85023	4.15291e-15	6.76743e-14	chr17	22181532	22290149	+	NA
ENSMUSG00000020227.11	14.7347	-7.46222	0.95089	-7.84762	4.24005e-15	6.90504e-14	chr10	119977552	120038035	-	NA
ENSMUSG00000043518.8	209.04	2.35466	0.300094	7.84643	4.28063e-15	6.96668e-14	chrX	160500064	160562492	+	NA
ENSMUSG00000033007.16	30.9183	3.44286	0.438858	7.84506	4.32761e-15	7.03864e-14	chr1	75427079	75450987	+	NA
ENSMUSG00000035473.11	20.4858	-3.84088	0.489677	-7.8437	4.37468e-15	7.11067e-14	chr17	80434899	80492530	+	NA
ENSMUSG00000063450.15	5029.53	0.804154	0.102529	7.84315	4.39379e-15	7.13718e-14	chr12	75864907	76157700	+	NA
ENSMUSG00000056367.15	566.056	-0.928946	0.118456	-7.84211	4.43037e-15	7.19203e-14	chr5	25964994	26055686	+	NA
ENSMUSG00000024909.16	1551.73	-0.934352	0.119148	-7.84198	4.43512e-15	7.19516e-14	chr19	5523981	5532545	+	NA
ENSMUSG00000071679.5	30.3386	-7.35305	0.938024	-7.83887	4.54615e-15	7.3706e-14	chrX	143471902	143905407	+	NA
ENSMUSG00000020166.16	2990.63	-0.63326	0.0807939	-7.83797	4.57894e-15	7.41905e-14	chr10	116321065	116417416	-	NA
ENSMUSG00000021108.19	82.2807	1.5485	0.197633	7.83524	4.67957e-15	7.57727e-14	chr12	73631569	73824959	+	NA
ENSMUSG00000035640.19	1675.4	-0.80812	0.103154	-7.83413	4.72093e-15	7.6394e-14	chr10	79966284	79976669	-	NA
ENSMUSG00000027956.12	28.6005	-5.70264	0.728134	-7.83185	4.80751e-15	7.77458e-14	chr3	79719870	79760080	-	NA
ENSMUSG00000101841.2	253.272	-0.98215	0.125445	-7.8293	4.90606e-15	7.92893e-14	chr11	9099777	9100597	-	NA
ENSMUSG00000025510.15	1458.31	-1.13162	0.144545	-7.82887	4.9226e-15	7.95062e-14	chr7	141047304	141051386	+	NA
ENSMUSG00000036270.17	4258.37	-0.432933	0.0553032	-7.82836	4.94292e-15	7.97838e-14	chr8	106607512	106621540	+	NA
ENSMUSG00000033610.17	693.669	-0.625979	0.0799671	-7.82796	4.95863e-15	7.99869e-14	chr19	34784339	34856855	-	NA
ENSMUSG00000049717.10	768.588	-0.824477	0.105346	-7.82637	5.0215e-15	8.09499e-14	chr8	10019048	10027686	-	NA
ENSMUSG00000106535.2	164.598	1.39245	0.177941	7.82535	5.06242e-15	8.15581e-14	chr5	4123570	4125457	+	NA
ENSMUSG00000025354.6	3263.32	-0.42831	0.0547432	-7.82398	5.11784e-15	8.23989e-14	chr10	128639930	128655315	+	NA
ENSMUSG00000022434.9	868.416	-0.714656	0.0913571	-7.82266	5.17171e-15	8.32136e-14	chr15	84913148	84947031	+	NA
ENSMUSG00000031536.7	1274.61	-0.752192	0.0961735	-7.8212	5.23205e-15	8.40883e-14	chr8	23118141	23143451	-	NA
ENSMUSG00000019961.18	14879.4	-0.925121	0.118284	-7.82119	5.23266e-15	8.40883e-14	chr10	90983432	91017177	-	NA
ENSMUSG00000066640.12	2455.16	0.548877	0.070182	7.82076	5.25045e-15	8.43211e-14	chr5	142852700	142881176	-	NA
ENSMUSG00000036199.10	3699.22	-0.656429	0.083947	-7.81956	5.30064e-15	8.50735e-14	chr8	70346829	70355208	-	NA
ENSMUSG00000047230.7	22.6346	3.31377	0.423826	7.8187	5.33698e-15	8.56031e-14	chrX	138701576	138712135	+	NA
ENSMUSG00000090258.8	17.2557	7.42246	0.949357	7.81841	5.34963e-15	8.5752e-14	chr12	76812311	76829954	+	NA
ENSMUSG00000044948.18	66.5462	1.62303	0.207657	7.81593	5.45568e-15	8.7397e-14	chr19	47725295	47907726	-	NA
ENSMUSG00000038886.11	4485.11	0.614534	0.0786586	7.81268	5.59855e-15	8.96295e-14	chr7	79998844	80021123	-	NA
ENSMUSG00000028763.19	3220.68	0.893957	0.114426	7.81256	5.6037e-15	8.96557e-14	chr4	137196079	137297941	+	NA
ENSMUSG00000028063.16	2992.91	1.00323	0.128443	7.81072	5.68609e-15	9.09168e-14	chr3	88387453	88417263	-	NA
ENSMUSG00000053714.10	52.5267	1.71666	0.219839	7.80873	5.77693e-15	9.23115e-14	chr7	25076243	25274499	+	NA
ENSMUSG00000059834.13	414.01	-0.900078	0.11531	-7.80574	5.91557e-15	9.44677e-14	chr3	41581154	41696949	-	NA
ENSMUSG00000031537.16	3446.63	-0.502193	0.0643655	-7.80221	6.08325e-15	9.70847e-14	chr8	23149227	23196605	-	NA
ENSMUSG00000019230.15	28.0321	2.96674	0.380363	7.79975	6.20284e-15	9.89314e-14	chr1	138752923	138776315	-	NA
ENSMUSG00000003068.18	5163.92	-0.409337	0.0524895	-7.79845	6.26712e-15	9.98942e-14	chr10	79951636	79966516	+	NA
ENSMUSG00000038679.17	3062.82	-0.933774	0.119748	-7.79782	6.2986e-15	1.00333e-13	chr15	50518147	50753859	-	NA
ENSMUSG00000036745.16	861.178	-0.746288	0.0957187	-7.79668	6.35569e-15	1.0118e-13	chr3	146558121	146689764	+	NA
ENSMUSG00000054728.18	312.643	-2.09801	0.269142	-7.79517	6.43227e-15	1.02335e-13	chr13	42834098	43292002	+	NA
ENSMUSG00000075232.7	2810.91	-0.951563	0.122089	-7.79403	6.49063e-15	1.03199e-13	chr10	40163453	40178184	-	NA
ENSMUSG00000026637.15	139.687	1.50459	0.19306	7.79336	6.52489e-15	1.03679e-13	chr1	191729165	191776868	-	NA
ENSMUSG00000025579.15	7023.65	0.837349	0.107458	7.79236	6.57708e-15	1.04443e-13	chr11	119158712	119176280	+	NA
ENSMUSG00000024747.4	439.881	-1.72283	0.221107	-7.79183	6.60468e-15	1.04816e-13	chr19	20670316	20704926	-	NA
ENSMUSG00000038421.14	16.175	-7.57427	0.972133	-7.79139	6.62766e-15	1.05116e-13	chr1	170745144	170755152	-	NA
ENSMUSG00000023979.15	45.2844	2.05014	0.263146	7.7909	6.65325e-15	1.05456e-13	chr17	47696317	47703892	+	NA
ENSMUSG00000031783.11	2029.67	-0.843514	0.10833	-7.78653	6.88758e-15	1.09103e-13	chr8	95584077	95600163	+	NA
ENSMUSG00000113528.3	66.2759	2.00092	0.256979	7.78631	6.89935e-15	1.09221e-13	chr13	18118847	18120871	+	NA
ENSMUSG00000022686.15	79.2408	9.04291	1.16162	7.78471	6.98751e-15	1.10548e-13	chr16	19578957	19591503	+	NA
ENSMUSG00000121191.1	127.244	1.27628	0.164122	7.77642	7.46038e-15	1.17956e-13	chr2	61363827	61372359	+	NA
ENSMUSG00000069755.7	91.9586	-1.52828	0.196603	-7.77344	7.638e-15	1.2069e-13	chr12	20948574	20952660	-	NA
ENSMUSG00000033427.15	28.7506	2.61643	0.336728	7.77018	7.83742e-15	1.23764e-13	chr10	75236948	75277513	+	NA
ENSMUSG00000073755.5	29.5726	-7.32694	0.943214	-7.76806	7.96953e-15	1.25773e-13	chr4	126503610	126508164	+	NA
ENSMUSG00000002006.13	793.126	-0.819862	0.105574	-7.76579	8.1138e-15	1.2797e-13	chrX	72836964	72868575	-	NA
ENSMUSG00000041817.15	508.684	0.873354	0.112519	7.76182	8.37185e-15	1.31959e-13	chr13	97203793	97267521	+	NA
ENSMUSG00000000876.12	203.791	-5.45606	0.703002	-7.76108	8.42108e-15	1.32623e-13	chr2	154427677	154445628	-	NA
ENSMUSG00000020173.18	20.5833	-7.35395	0.947548	-7.76103	8.42441e-15	1.32623e-13	chr11	12186607	12414960	-	NA
ENSMUSG00000015942.10	786.127	0.589162	0.0759162	7.76069	8.44713e-15	1.32899e-13	chr5	134212857	134253209	+	NA
ENSMUSG00000027996.14	44.564	-2.94256	0.37924	-7.7591	8.55374e-15	1.34493e-13	chr3	83673627	83681623	+	NA
ENSMUSG00000038402.3	19.8475	-7.31832	0.943993	-7.75251	9.00927e-15	1.41569e-13	chr13	31809798	31815386	+	NA
ENSMUSG00000034997.6	14.6408	-7.46925	0.963778	-7.74998	9.19105e-15	1.44336e-13	chr14	74878279	74946934	+	NA
ENSMUSG00000063511.12	15745.5	0.379378	0.0489527	7.74989	9.19692e-15	1.4434e-13	chr7	45025876	45045166	-	NA
ENSMUSG00000048537.17	8798.43	1.05722	0.136543	7.74274	9.73004e-15	1.52613e-13	chr9	44597600	44646495	-	NA
ENSMUSG00000087177.9	1177.27	-0.77433	0.100027	-7.74123	9.84611e-15	1.54338e-13	chr10	39497407	39608012	-	NA
ENSMUSG00000039934.13	769.974	-0.978412	0.126393	-7.74102	9.86186e-15	1.5449e-13	chr5	21391252	21520130	+	NA
ENSMUSG00000030282.15	1845.45	-0.71009	0.0917379	-7.74042	9.90895e-15	1.55133e-13	chr6	142702411	142721440	+	NA
ENSMUSG00000038576.16	1349.37	-1.26445	0.163474	-7.73483	1.03542e-14	1.62004e-13	chr1	182591424	182724156	+	NA
ENSMUSG00000026798.11	247.802	0.735887	0.0951807	7.73147	1.06309e-14	1.66231e-13	chr2	29677504	29687947	+	NA
ENSMUSG00000019856.15	614.289	-0.807385	0.104458	-7.72926	1.08171e-14	1.69039e-13	chr10	53509240	53627219	-	NA
ENSMUSG00000060594.7	20.1539	-7.33455	0.948969	-7.72897	1.08419e-14	1.69324e-13	chr9	50965939	50988394	-	NA
ENSMUSG00000074093.5	267.165	1.98147	0.256433	7.72705	1.10071e-14	1.71798e-13	chr7	51646918	51655766	-	NA
ENSMUSG00000041245.14	624.973	-0.972879	0.126001	-7.7212	1.15237e-14	1.79752e-13	chrX	149981073	150103148	+	NA
ENSMUSG00000020646.18	2158.98	0.709797	0.0919338	7.72074	1.15653e-14	1.8029e-13	chr12	24880877	25014396	+	NA
ENSMUSG00000036825.13	1630.1	-0.589441	0.0763864	-7.71658	1.19493e-14	1.86162e-13	chr3	146110396	146145899	+	NA
ENSMUSG00000026946.10	390.815	-1.52616	0.197784	-7.71628	1.19774e-14	1.86486e-13	chr2	51838498	51863506	-	NA
ENSMUSG00000053219.16	34.0622	-2.3492	0.30448	-7.71545	1.20559e-14	1.87594e-13	chr10	22034467	22250038	+	NA
ENSMUSG00000032911.7	9061.31	0.873315	0.113295	7.70834	1.27469e-14	1.98226e-13	chr9	56772316	56807154	+	NA
ENSMUSG00000030279.16	1530.61	-0.752264	0.097615	-7.70645	1.29369e-14	2.01058e-13	chr6	142956645	143045867	-	NA
ENSMUSG00000039316.15	16.8739	-4.28603	0.556242	-7.70533	1.30511e-14	2.02709e-13	chr17	50299284	50497702	-	NA
ENSMUSG00000002985.17	18334.8	1.91493	0.248526	7.70515	1.30689e-14	2.02861e-13	chr7	19430033	19433113	-	NA
ENSMUSG00000025350.16	276.981	1.74698	0.22677	7.70375	1.32133e-14	2.04979e-13	chr10	128749461	128758757	-	NA
ENSMUSG00000022234.16	17146.6	-0.552987	0.0717828	-7.70362	1.32269e-14	2.05066e-13	chr15	31590945	31601950	-	NA
ENSMUSG00000029802.14	649.183	-1.90614	0.247482	-7.70214	1.33802e-14	2.07316e-13	chr6	58561507	58672661	+	NA
ENSMUSG00000020175.16	400.256	-1.10876	0.143972	-7.70122	1.34774e-14	2.08696e-13	chr10	74872889	74890580	+	NA
ENSMUSG00000021417.16	3011.56	0.804859	0.104518	7.70064	1.35384e-14	2.09513e-13	chr13	35161730	35211079	-	NA
ENSMUSG00000117813.2	17.7002	-3.11806	0.405138	-7.69628	1.40082e-14	2.16652e-13	chr18	80002220	80002754	+	NA
ENSMUSG00000032579.15	455.099	0.972711	0.126396	7.69576	1.40653e-14	2.17403e-13	chr9	107204282	107215549	-	NA
ENSMUSG00000043336.15	18.984	4.06819	0.528669	7.69516	1.41322e-14	2.18305e-13	chr16	57173455	57393489	+	NA
ENSMUSG00000006567.12	227.75	-1.29413	0.168211	-7.69348	1.43189e-14	2.21056e-13	chr8	22482800	22550321	-	NA
ENSMUSG00000002908.18	370.415	-1.41139	0.183494	-7.69173	1.45158e-14	2.23959e-13	chr8	71294692	71315902	-	NA
ENSMUSG00000044176.13	26.7705	-2.29247	0.298066	-7.69117	1.45799e-14	2.24812e-13	chr18	62681981	62801141	+	NA
ENSMUSG00000026864.14	19589.8	-1.0339	0.134454	-7.68962	1.47569e-14	2.27404e-13	chr2	34661981	34667559	+	NA
ENSMUSG00000063558.5	672.962	1.37148	0.178466	7.68483	1.53197e-14	2.3565e-13	chr1	58069089	58145572	+	NA
ENSMUSG00000021215.16	551.573	-1.4819	0.192834	-7.68484	1.53184e-14	2.3565e-13	chr13	3932017	3968220	-	NA
ENSMUSG00000046532.9	29.9216	-7.31887	0.952368	-7.68492	1.53097e-14	2.3565e-13	chrX	97192374	97366821	+	NA
ENSMUSG00000001750.17	400.859	-1.56163	0.203215	-7.68461	1.53469e-14	2.35926e-13	chr19	3946049	3957133	-	NA
ENSMUSG00000101892.2	226.048	-1.00547	0.130844	-7.68449	1.53604e-14	2.35992e-13	chr15	57885654	57897721	-	NA
ENSMUSG00000001383.10	3897.05	0.432753	0.0563198	7.68385	1.54373e-14	2.3703e-13	chr18	36926928	36932719	+	NA
ENSMUSG00000037570.17	2491.52	-0.657089	0.0855362	-7.682	1.56624e-14	2.40342e-13	chr15	99140697	99149842	-	NA
ENSMUSG00000108634.3	230.661	2.21102	0.287946	7.6786	1.60839e-14	2.46661e-13	chr11	88144193	88147818	+	NA
ENSMUSG00000037321.18	72.8323	-2.15637	0.280959	-7.67504	1.65373e-14	2.53462e-13	chr17	34406526	34416199	+	NA
ENSMUSG00000025221.17	63.8581	-1.80621	0.235473	-7.67055	1.71264e-14	2.62335e-13	chr19	45780277	45804500	-	NA
ENSMUSG00000031633.5	22981.3	-0.804485	0.104894	-7.66954	1.7262e-14	2.64252e-13	chr8	46659833	46664321	-	NA
ENSMUSG00000021359.17	266.332	-4.66757	0.608955	-7.66488	1.78992e-14	2.73843e-13	chr13	40868777	40891852	-	NA
ENSMUSG00000109390.2	100.816	1.315	0.17159	7.6636	1.80794e-14	2.76434e-13	chr7	80560120	80563914	-	NA
ENSMUSG00000073910.11	581.612	1.26238	0.164862	7.6572	1.90037e-14	2.90392e-13	chr4	34949073	35157484	-	NA
ENSMUSG00000019990.16	877.327	-1.29973	0.169757	-7.65641	1.91198e-14	2.91992e-13	chr10	20273749	20600824	-	NA
ENSMUSG00000034863.10	4687.03	-0.78526	0.102574	-7.65558	1.92449e-14	2.93726e-13	chr8	71928662	71938607	-	NA
ENSMUSG00000036550.17	12846.3	-0.632136	0.0825981	-7.65316	1.96094e-14	2.99111e-13	chr8	96446078	96534092	-	NA
ENSMUSG00000037134.18	1073.83	-0.669616	0.0875067	-7.65216	1.97624e-14	3.01264e-13	chr8	78276025	78307967	+	NA
ENSMUSG00000013921.16	10934.5	1.01428	0.132554	7.65187	1.98075e-14	3.01767e-13	chr7	29991152	30007792	+	NA
ENSMUSG00000040649.16	942.868	-2.08512	0.272501	-7.6518	1.9819e-14	3.01767e-13	chr6	122424254	122475720	-	NA
ENSMUSG00000046034.9	919.497	-0.688908	0.0900836	-7.64742	2.05046e-14	3.1202e-13	chr15	27542720	27630779	-	NA
ENSMUSG00000054676.18	13.1474	-7.30044	0.95465	-7.64725	2.0533e-14	3.12266e-13	chr7	37882641	37896992	+	NA
ENSMUSG00000100183.2	40.7719	1.98199	0.259193	7.64677	2.06087e-14	3.1323e-13	chr1	153626427	153627293	+	NA
ENSMUSG00000031979.18	1640.82	-0.584892	0.0765067	-7.64498	2.08985e-14	3.17445e-13	chr8	125247505	125278747	+	NA
ENSMUSG00000035769.10	314.825	0.858977	0.112366	7.64446	2.09822e-14	3.18527e-13	chr9	119186446	119222863	+	NA
ENSMUSG00000020634.13	896.276	0.562684	0.0736214	7.64294	2.12319e-14	3.22127e-13	chr12	4929031	4957705	-	NA
ENSMUSG00000078956.5	17.7987	3.6931	0.483256	7.64212	2.13676e-14	3.23993e-13	chr2	160409531	160498188	-	NA
ENSMUSG00000053395.16	336.167	-1.11613	0.146059	-7.64164	2.14476e-14	3.25013e-13	chr7	3439198	3464164	+	NA
ENSMUSG00000032376.13	1901.84	0.627071	0.0821542	7.63285	2.29615e-14	3.47748e-13	chr9	66421918	66500424	-	NA
ENSMUSG00000001786.15	671.155	-0.854174	0.111934	-7.63106	2.32827e-14	3.52403e-13	chr10	85857835	85887737	+	NA
ENSMUSG00000048281.10	26.618	-7.15467	0.937884	-7.62852	2.37466e-14	3.59211e-13	chr14	62513679	62530496	-	NA
ENSMUSG00000031962.7	21.6268	3.10779	0.407408	7.62819	2.38063e-14	3.59902e-13	chr8	123574704	123594136	+	NA
ENSMUSG00000031520.7	19.766	-5.43549	0.712592	-7.62778	2.38831e-14	3.60849e-13	chr8	54530640	54640131	+	NA
ENSMUSG00000025933.16	159.734	-1.06248	0.139336	-7.62529	2.43486e-14	3.67664e-13	chr1	21288798	21300391	+	NA
ENSMUSG00000055958.4	56.51	-1.92342	0.252513	-7.6171	2.5943e-14	3.91507e-13	chr10	58648395	58648964	-	NA
ENSMUSG00000047842.8	17.3404	-3.58275	0.470373	-7.61683	2.59983e-14	3.92111e-13	chr13	52658415	52685315	-	NA
ENSMUSG00000015224.11	681.567	-0.939562	0.123375	-7.61548	2.62721e-14	3.96006e-13	chr4	96456665	96479815	-	NA
ENSMUSG00000029185.15	543.018	-1.16583	0.153101	-7.61476	2.64178e-14	3.97967e-13	chr5	65127413	65199229	+	NA
ENSMUSG00000029578.16	4069.91	0.768968	0.100988	7.61448	2.64745e-14	3.98586e-13	chr5	142613452	142656343	+	NA
ENSMUSG00000037890.14	976.043	0.970852	0.127512	7.61379	2.66168e-14	4.00491e-13	chr5	65357038	65417758	+	NA
ENSMUSG00000018102.6	1068.39	1.33317	0.175145	7.61181	2.70278e-14	4.06436e-13	chr13	23868181	23876891	+	NA
ENSMUSG00000050397.5	15.4304	-7.52554	0.988726	-7.61135	2.71251e-14	4.0766e-13	chr9	98837340	98840596	+	NA
ENSMUSG00000017715.12	1941.43	-0.479015	0.0629622	-7.60797	2.7843e-14	4.18202e-13	chr11	117877117	117914837	+	NA
ENSMUSG00000111514.2	13.112	-7.31451	0.961703	-7.60579	2.83176e-14	4.25081e-13	chr10	84353908	84359134	+	NA
ENSMUSG00000031862.12	4354.13	-0.391868	0.0515366	-7.60369	2.87809e-14	4.31781e-13	chr8	70243812	70260399	+	NA
ENSMUSG00000051747.16	55.9587	1.8609	0.244744	7.60346	2.88322e-14	4.32297e-13	chr2	76534323	76812891	-	NA
ENSMUSG00000030681.19	219.208	0.999971	0.131577	7.59987	2.96419e-14	4.44175e-13	chr7	126586031	126613793	-	NA
ENSMUSG00000041058.16	1680.89	-0.682979	0.0898712	-7.59953	2.97206e-14	4.45094e-13	chr4	19608302	19708993	-	NA
ENSMUSG00000097392.5	1236.02	0.618448	0.081381	7.59942	2.97462e-14	4.45216e-13	chr5	104656215	104702073	+	NA
ENSMUSG00000029559.16	1432.49	0.598893	0.0788358	7.59672	3.03726e-14	4.54324e-13	chr5	115080216	115087842	+	NA
ENSMUSG00000001270.10	153161	-0.53643	0.0706364	-7.59425	3.09592e-14	4.62828e-13	chr12	111635794	111638772	-	NA
ENSMUSG00000049521.3	2646.85	-0.891017	0.117342	-7.59331	3.11839e-14	4.65915e-13	chr15	78726823	78735097	+	NA
ENSMUSG00000066553.6	1347.08	-0.961136	0.126696	-7.58615	3.29547e-14	4.92084e-13	chr12	24688667	24689009	-	NA
ENSMUSG00000022439.10	20.7163	-5.48296	0.723191	-7.58161	3.41285e-14	5.09314e-13	chr15	84208226	84227179	+	NA
ENSMUSG00000003411.11	129.157	-1.88509	0.248777	-7.5774	3.52548e-14	5.25814e-13	chr4	108736259	108800521	+	NA
ENSMUSG00000069020.10	1555.48	0.731393	0.0965402	7.57604	3.56261e-14	5.31041e-13	chr2	29710086	29735014	+	NA
ENSMUSG00000027381.18	704.33	0.888571	0.117326	7.57352	3.63246e-14	5.41137e-13	chr2	127967957	128004467	+	NA
ENSMUSG00000027954.10	49.516	-2.14088	0.282777	-7.57091	3.70618e-14	5.51797e-13	chr3	89179039	89188449	-	NA
ENSMUSG00000032946.17	109.814	-1.54878	0.204579	-7.57058	3.71552e-14	5.52865e-13	chr19	6449369	6465246	+	NA
ENSMUSG00000006369.15	46.0219	-6.64666	0.878279	-7.56783	3.79518e-14	5.64389e-13	chr15	85090149	85170736	+	NA
ENSMUSG00000029598.13	2352.94	0.881635	0.116525	7.56606	3.8471e-14	5.71778e-13	chr5	120621346	120641690	-	NA
ENSMUSG00000091994.3	182.539	-1.49516	0.19774	-7.56123	3.99267e-14	5.93067e-13	chr10	79687214	79690805	-	NA
ENSMUSG00000021224.16	605.208	0.555176	0.0734292	7.5607	4.00911e-14	5.95163e-13	chr12	83840807	83968708	-	NA
ENSMUSG00000061286.8	1012.55	0.626099	0.0828229	7.5595	4.04635e-14	6.00342e-13	chr7	25358588	25370793	+	NA
ENSMUSG00000030409.17	608.25	0.976445	0.129197	7.55778	4.10002e-14	6.07951e-13	chr7	18817773	18827746	+	NA
ENSMUSG00000090063.8	16.5112	-4.87041	0.644511	-7.55675	4.13253e-14	6.12416e-13	chr6	6749739	6871632	-	NA
ENSMUSG00000116765.2	17.984	-2.94326	0.389502	-7.55647	4.14144e-14	6.13381e-13	chr13	74622761	74624187	+	NA
ENSMUSG00000070643.12	507.069	1.4531	0.192317	7.55578	4.16369e-14	6.16318e-13	chr1	133310040	133352115	-	NA
ENSMUSG00000024454.17	3164.4	0.55967	0.0740751	7.55544	4.17445e-14	6.17552e-13	chr18	38068896	38088069	-	NA
ENSMUSG00000002980.15	76.0263	1.66345	0.220265	7.55207	4.28393e-14	6.33381e-13	chr7	19490055	19504941	-	NA
ENSMUSG00000005686.18	1036.15	1.33173	0.176396	7.54964	4.36457e-14	6.4493e-13	chr7	110367412	110411612	+	NA
ENSMUSG00000054452.11	10713.3	-0.96179	0.127474	-7.54496	4.52414e-14	6.68122e-13	chr10	81395321	81402196	+	NA
ENSMUSG00000033377.15	171.808	-1.496	0.198341	-7.54258	4.60778e-14	6.8008e-13	chr3	116711906	116762636	-	NA
ENSMUSG00000045679.15	57.0904	1.63098	0.216285	7.54085	4.669e-14	6.88718e-13	chr12	17038648	17050409	-	NA
ENSMUSG00000036990.14	4499.79	-0.813951	0.107944	-7.54053	4.6807e-14	6.90045e-13	chr8	80366246	80404353	+	NA
ENSMUSG00000103409.3	39.4035	1.87244	0.248364	7.53909	4.73246e-14	6.97273e-13	chr9	107469828	107474274	-	NA
ENSMUSG00000044667.13	59.2544	-1.41198	0.18729	-7.53902	4.73525e-14	6.97282e-13	chr3	117112787	117154525	-	NA
ENSMUSG00000022575.6	16.3535	-4.42725	0.587301	-7.5383	4.76126e-14	7.00707e-13	chr15	75734175	75739257	+	NA
ENSMUSG00000037343.9	3487.99	-0.699869	0.0928552	-7.53721	4.80134e-14	7.06198e-13	chr15	54878526	54935548	-	NA
ENSMUSG00000032883.16	5438.7	-0.576341	0.07649	-7.53485	4.88896e-14	7.18671e-13	chr1	78635541	78685460	+	NA
ENSMUSG00000104988.2	13.9345	-7.40772	0.983317	-7.5334	4.9436e-14	7.26285e-13	chr9	110081193	110083212	-	NA
ENSMUSG00000010660.4	1860.18	1.03767	0.137835	7.52838	5.13729e-14	7.54307e-13	chr9	118900594	118922570	-	NA
ENSMUSG00000085412.9	349.303	1.49477	0.198575	7.52749	5.17233e-14	7.59014e-13	chr6	52079902	52091977	+	NA
ENSMUSG00000061815.12	21.4468	2.94354	0.391077	7.52674	5.20214e-14	7.6295e-13	chr1	74164699	74187382	+	NA
ENSMUSG00000029098.18	551.776	0.748239	0.0994884	7.52087	5.44138e-14	7.9758e-13	chr5	35740383	35772696	+	NA
ENSMUSG00000104507.2	19.4572	-5.37328	0.714464	-7.5207	5.44823e-14	7.98125e-13	chr1	189075627	189077094	+	NA
ENSMUSG00000041852.16	2620.09	-0.648175	0.0861869	-7.52058	5.45333e-14	7.98414e-13	chr15	82692636	82872073	-	NA
ENSMUSG00000052688.13	273.313	-1.77134	0.235583	-7.51898	5.5205e-14	8.07785e-13	chr1	131616432	131643177	+	NA
ENSMUSG00000005161.16	11920	-0.66576	0.0885495	-7.51851	5.5402e-14	8.10203e-13	chr8	85696215	85701463	+	NA
ENSMUSG00000005681.13	25.6274	-7.11594	0.946564	-7.51765	5.57676e-14	8.15082e-13	chr1	171052622	171053948	+	NA
ENSMUSG00000027676.12	236.397	1.19408	0.158867	7.51621	5.63862e-14	8.23652e-13	chr3	33866510	33898459	-	NA
ENSMUSG00000052371.6	25.3557	-7.0715	0.940886	-7.51579	5.65704e-14	8.25869e-13	chr2	74533591	74546474	-	NA
ENSMUSG00000035179.5	37.1151	1.89511	0.252193	7.51455	5.71061e-14	8.33214e-13	chr19	10451598	10460292	-	NA
ENSMUSG00000054648.9	1431.32	-0.56929	0.0757604	-7.51435	5.71959e-14	8.34046e-13	chr8	70155305	70169633	-	NA
ENSMUSG00000056629.17	1901.16	-0.559853	0.0745562	-7.50914	5.95171e-14	8.66904e-13	chr19	6955108	6957869	-	NA
ENSMUSG00000031924.5	10239.3	-1.22999	0.163799	-7.50915	5.95115e-14	8.66904e-13	chr8	107877271	107914103	+	NA
ENSMUSG00000028707.16	26.0163	-2.76993	0.368879	-7.50905	5.95568e-14	8.66988e-13	chr4	115772315	115797123	-	NA
ENSMUSG00000050786.9	178.173	-1.00555	0.133985	-7.50489	6.14779e-14	8.94444e-13	chr6	49296207	49318516	+	NA
ENSMUSG00000039031.17	2279.29	-1.06699	0.142186	-7.50416	6.18235e-14	8.9896e-13	chr10	26629416	26794644	+	NA
ENSMUSG00000024841.9	1860.05	-0.539116	0.0718832	-7.49989	6.38712e-14	9.28205e-13	chr19	5416768	5421554	+	NA
ENSMUSG00000031756.6	1395.5	-1.08746	0.145025	-7.49844	6.45842e-14	9.38033e-13	chr8	117648468	117668246	+	NA
ENSMUSG00000046714.8	72.1532	-2.42722	0.3237	-7.49835	6.4626e-14	9.38107e-13	chr8	121842909	121845634	+	NA
ENSMUSG00000047246.8	108.483	1.82377	0.243284	7.49646	6.55657e-14	9.50816e-13	chr13	23767652	23805107	-	NA
ENSMUSG00000063600.15	52.0276	-1.92837	0.257239	-7.49644	6.55761e-14	9.50816e-13	chr3	29136171	29745358	+	NA
ENSMUSG00000042258.14	13.1801	-7.32401	0.977162	-7.49518	6.62061e-14	9.59406e-13	chr13	116434816	116446225	-	NA
ENSMUSG00000040883.19	507.174	0.711712	0.0950237	7.48984	6.89584e-14	9.98723e-13	chr9	21832303	21838852	-	NA
ENSMUSG00000006235.7	28.6232	-2.51144	0.335403	-7.48785	7.0013e-14	1.01342e-12	chr9	21870192	21874802	-	NA
ENSMUSG00000025362.7	22650.5	-0.581548	0.0776888	-7.48562	7.12128e-14	1.0302e-12	chr10	128460402	128462616	-	NA
ENSMUSG00000068259.5	45.2153	2.61707	0.349654	7.48473	7.16923e-14	1.03649e-12	chr6	40519104	40531984	-	NA
ENSMUSG00000001911.17	10409.5	-0.827007	0.110493	-7.48467	7.17289e-14	1.03649e-12	chr8	85426504	85526973	-	NA
ENSMUSG00000030351.6	193.833	1.7282	0.230916	7.48409	7.20424e-14	1.04044e-12	chr6	127864551	127930940	+	NA
ENSMUSG00000039662.17	1690.31	0.492718	0.0658864	7.4783	7.52921e-14	1.08675e-12	chr4	152381683	152391578	+	NA
ENSMUSG00000047417.19	4030.3	-0.563968	0.0754255	-7.47715	7.59496e-14	1.09562e-12	chr10	80376755	80397394	-	NA
ENSMUSG00000041189.10	77.8388	1.49126	0.199511	7.47456	7.74634e-14	1.11683e-12	chr11	69674861	69686769	-	NA
ENSMUSG00000026353.10	5445.45	0.464365	0.0621309	7.47398	7.78059e-14	1.12113e-12	chr1	128171700	128207115	+	NA
ENSMUSG00000101429.2	23.2064	4.27004	0.571489	7.47178	7.91155e-14	1.13936e-12	chr1	57239803	57254152	-	NA
ENSMUSG00000028610.17	278.215	1.64515	0.220187	7.47162	7.92111e-14	1.1401e-12	chr4	107533486	107541427	-	NA
ENSMUSG00000001467.6	9396.27	-0.923981	0.123672	-7.47124	7.9444e-14	1.1428e-12	chr5	4131144	4154746	-	NA
ENSMUSG00000031631.16	1049.24	-0.529046	0.0708131	-7.47102	7.95753e-14	1.14405e-12	chr8	46604807	46648627	+	NA
ENSMUSG00000045482.17	11801.8	0.49283	0.0660044	7.46661	8.22845e-14	1.18233e-12	chr5	144704541	144796588	+	NA
ENSMUSG00000026436.16	2580.23	0.702516	0.0941156	7.46439	8.36839e-14	1.20176e-12	chr1	131935344	131960350	+	NA
ENSMUSG00000090071.5	128.987	-1.49901	0.200897	-7.46158	8.54932e-14	1.22705e-12	chr1	74894092	74896891	+	NA
ENSMUSG00000071317.5	176.42	-1.52145	0.203954	-7.45977	8.66756e-14	1.24332e-12	chr10	45211867	45248575	+	NA
ENSMUSG00000107176.2	7237.03	0.479458	0.064287	7.45809	8.7787e-14	1.25856e-12	chr6	66852304	66852727	-	NA
ENSMUSG00000023999.15	20.8938	-2.78298	0.373295	-7.45517	8.97491e-14	1.28597e-12	chr17	49922163	50216875	+	NA
ENSMUSG00000001627.13	1443.26	-0.883679	0.11854	-7.45472	9.00617e-14	1.28972e-12	chr12	40251565	40298503	-	NA
ENSMUSG00000066880.16	760.948	-0.578125	0.077558	-7.45411	9.04774e-14	1.29495e-12	chr8	72662478	72688473	+	NA
ENSMUSG00000005886.15	2628.28	-0.487101	0.0653593	-7.45267	9.14725e-14	1.30846e-12	chr1	13209328	13444307	-	NA
ENSMUSG00000016194.15	20.2265	3.25498	0.436836	7.45128	9.24396e-14	1.32155e-12	chr1	192903941	192946383	-	NA
ENSMUSG00000062373.9	1653.43	-0.733671	0.098532	-7.44602	9.62011e-14	1.37456e-12	chr15	58654117	58695487	-	NA
ENSMUSG00000032298.14	571.241	0.741095	0.0995533	7.44421	9.75281e-14	1.39274e-12	chr9	57050083	57055589	-	NA
ENSMUSG00000037710.9	1693.28	-0.925771	0.12439	-7.44252	9.87859e-14	1.40991e-12	chr10	71166309	71180784	-	NA
ENSMUSG00000028617.11	1726.28	0.96498	0.129661	7.44234	9.89135e-14	1.41024e-12	chr4	107090710	107110729	-	NA
ENSMUSG00000063889.17	427.075	-0.656891	0.088264	-7.44234	9.89196e-14	1.41024e-12	chr18	3266047	3337748	-	NA
ENSMUSG00000060036.15	44214.2	0.5933	0.0797741	7.43724	1.02808e-13	1.46485e-12	chr15	79961991	79976069	-	NA
ENSMUSG00000045374.19	2409.38	0.98194	0.132033	7.43707	1.02944e-13	1.46598e-12	chr11	75331769	75345543	-	NA
ENSMUSG00000034908.17	2392.96	0.854038	0.114854	7.43588	1.03876e-13	1.47843e-12	chr9	45849154	45866556	-	NA
ENSMUSG00000055835.11	605.338	-0.683915	0.0919873	-7.43489	1.04659e-13	1.48873e-12	chr8	112370032	112397643	+	NA
ENSMUSG00000022262.9	16.5598	-3.1078	0.418045	-7.43413	1.05256e-13	1.49639e-12	chr15	28203897	28472198	+	NA
ENSMUSG00000027605.19	1231.97	-0.875547	0.117788	-7.43325	1.05958e-13	1.50554e-12	chr2	155359867	155427644	+	NA
ENSMUSG00000035394.12	31.362	1.93768	0.260709	7.43236	1.06681e-13	1.51496e-12	chr18	74416160	74493057	+	NA
ENSMUSG00000017400.11	71.6344	-2.55455	0.343819	-7.42992	1.0866e-13	1.54221e-12	chr11	97927448	97944288	-	NA
ENSMUSG00000041120.7	1095.63	1.27554	0.171693	7.42918	1.09276e-13	1.55009e-12	chr4	138809594	138820304	-	NA
ENSMUSG00000046707.10	3672.99	-0.676108	0.0911594	-7.41677	1.20014e-13	1.70146e-12	chr8	96172723	96216667	-	NA
ENSMUSG00000042523.13	693.206	0.571351	0.0770504	7.41529	1.21356e-13	1.71953e-12	chr12	84161139	84194272	+	NA
ENSMUSG00000031644.20	1189.99	-0.794218	0.107109	-7.41502	1.21602e-13	1.72207e-12	chr8	61446228	61584380	+	NA
ENSMUSG00000057337.15	3832.97	-0.983073	0.132657	-7.41064	1.25696e-13	1.77905e-12	chr10	60017353	60055082	-	NA
ENSMUSG00000049929.8	177.357	-4.56602	0.616396	-7.40761	1.28597e-13	1.81911e-12	chrX	105964230	105977506	+	NA
ENSMUSG00000120741.1	16.7677	4.04661	0.546347	7.40666	1.29525e-13	1.83121e-12	chr9	97157764	97176521	+	NA
ENSMUSG00000031781.15	2377.63	-0.9239	0.124769	-7.40485	1.31295e-13	1.85521e-12	chr8	95546431	95564986	-	NA
ENSMUSG00000019992.9	405.318	-1.14264	0.154331	-7.40382	1.32326e-13	1.86875e-12	chr10	20223515	20237050	+	NA
ENSMUSG00000029101.17	2329.38	0.516159	0.0697213	7.40316	1.32977e-13	1.8769e-12	chr5	35106788	35196988	+	NA
ENSMUSG00000027667.14	1073.24	-0.634988	0.0857878	-7.40185	1.34302e-13	1.89456e-12	chr3	32564407	32574982	+	NA
ENSMUSG00000037375.17	23.8208	-7.00869	0.94703	-7.40071	1.35461e-13	1.90985e-12	chr1	192179018	192453531	-	NA
ENSMUSG00000064293.15	57.0575	-2.14444	0.289794	-7.39986	1.36325e-13	1.92098e-12	chr6	105654620	106676271	+	NA
ENSMUSG00000057788.14	2071.35	-0.519966	0.0703177	-7.39453	1.41913e-13	1.99861e-12	chr8	70745515	70755139	-	NA
ENSMUSG00000022656.16	2102.59	0.586887	0.0794036	7.39119	1.4552e-13	2.04827e-12	chr16	46208068	46318888	-	NA
ENSMUSG00000045917.18	323.836	-1.81167	0.245127	-7.39073	1.46025e-13	2.05425e-12	chr4	63477017	63504594	+	NA
ENSMUSG00000028082.15	10192	0.519532	0.0703001	7.39021	1.46602e-13	2.06086e-12	chr3	85878415	86037833	+	NA
ENSMUSG00000022436.17	68.4333	-1.44625	0.195699	-7.39016	1.46656e-13	2.06086e-12	chr15	78783967	78796251	+	NA
ENSMUSG00000037979.14	575.613	0.648649	0.0877799	7.38949	1.47395e-13	2.0701e-12	chr5	124911481	124939488	-	NA
ENSMUSG00000019795.18	3579.73	-0.658328	0.0891266	-7.38644	1.50815e-13	2.11697e-12	chr10	7505136	7556900	-	NA
ENSMUSG00000050229.4	2438.79	0.811117	0.109843	7.38434	1.53214e-13	2.14946e-12	chr1	172204112	172211666	+	NA
ENSMUSG00000013523.14	7960.86	0.652234	0.0883385	7.38335	1.54357e-13	2.1643e-12	chr2	170188910	170269765	-	NA
ENSMUSG00000036242.16	683.631	-1.50701	0.204209	-7.37974	1.58603e-13	2.22262e-12	chr14	49913408	50020840	-	NA
ENSMUSG00000003955.9	2006.67	-0.918052	0.124435	-7.37775	1.60992e-13	2.25487e-12	chr16	35864130	35891964	-	NA
ENSMUSG00000052581.14	23.0418	-6.38154	0.865175	-7.37601	1.63104e-13	2.28318e-12	chr6	79995859	80787124	+	NA
ENSMUSG00000081179.2	108.589	-1.09392	0.148492	-7.36686	1.74697e-13	2.44413e-12	chr4	147819933	147822883	-	NA
ENSMUSG00000114771.2	21.9379	3.00418	0.407913	7.36474	1.77488e-13	2.48182e-12	chr13	67375060	67378033	-	NA
ENSMUSG00000072825.12	23.2219	3.99026	0.541841	7.36426	1.78128e-13	2.48941e-12	chr12	112686888	112713026	+	NA
ENSMUSG00000061983.8	12435.4	-0.519072	0.0704922	-7.36353	1.79109e-13	2.50174e-12	chr10	23661080	23663173	-	NA
ENSMUSG00000055652.15	1511.96	-0.624146	0.0847687	-7.36293	1.79918e-13	2.51167e-12	chr7	75498057	75523879	+	NA
ENSMUSG00000025812.19	3528.38	-0.684868	0.0930599	-7.35943	1.84693e-13	2.57691e-12	chr8	127790642	128338767	+	NA
ENSMUSG00000040543.17	64.6197	1.32761	0.180458	7.3569	1.88226e-13	2.62478e-12	chr11	71938353	72026604	-	NA
ENSMUSG00000027168.22	1115.01	-0.757074	0.102919	-7.35601	1.89492e-13	2.64098e-12	chr2	105499244	105527709	+	NA
ENSMUSG00000074305.10	2530.77	0.729909	0.0992281	7.35587	1.89685e-13	2.64224e-12	chr9	56108409	56325351	-	NA
ENSMUSG00000041144.13	97.6215	-1.78907	0.243268	-7.35432	1.91908e-13	2.67173e-12	chr1	46105474	46412710	+	NA
ENSMUSG00000048216.14	467.615	-1.35085	0.183729	-7.35243	1.94639e-13	2.70828e-12	chr6	13834456	13839941	-	NA
ENSMUSG00000055707.14	1336.64	-0.67152	0.0913399	-7.35188	1.95444e-13	2.718e-12	chr8	70902868	70929618	-	NA
ENSMUSG00000028412.18	2605.85	1.15172	0.156675	7.35104	1.96674e-13	2.73361e-12	chr4	53440412	53622478	+	NA
ENSMUSG00000027674.17	88.1269	-2.10569	0.286588	-7.34743	2.0205e-13	2.80681e-12	chr3	33003556	33197396	-	NA
ENSMUSG00000020986.14	2500.23	-0.568753	0.0774277	-7.3456	2.04837e-13	2.84398e-12	chr12	59005168	59058803	-	NA
ENSMUSG00000040701.17	365.095	1.49911	0.204122	7.34419	2.07003e-13	2.87249e-12	chr14	55336031	55344050	-	NA
ENSMUSG00000025935.11	2511.94	-0.609331	0.0829799	-7.34312	2.08669e-13	2.89404e-12	chr1	13634921	13660134	-	NA
ENSMUSG00000001555.11	185.95	3.91389	0.533253	7.33966	2.14144e-13	2.96835e-12	chr11	100306522	100315650	+	NA
ENSMUSG00000022253.18	1292.66	-0.772271	0.105253	-7.33727	2.18001e-13	3.02018e-12	chr15	9071339	9110979	+	NA
ENSMUSG00000120849.1	12.1287	-7.20506	0.982275	-7.33508	2.21595e-13	3.06831e-12	chr14	54679605	54679902	+	NA
ENSMUSG00000006019.16	748.152	0.686849	0.093653	7.33399	2.23407e-13	3.09115e-12	chr7	15931071	15955962	-	NA
ENSMUSG00000031889.10	911.828	-0.461408	0.0629141	-7.33394	2.23487e-13	3.09115e-12	chr8	105951776	105979685	+	NA
ENSMUSG00000034227.8	390.789	-0.976056	0.133125	-7.33189	2.2693e-13	3.13706e-12	chr11	116221529	116226225	-	NA
ENSMUSG00000015656.18	49576.2	0.812056	0.110761	7.33164	2.27351e-13	3.14118e-12	chr9	40712279	40721383	+	NA
ENSMUSG00000022594.15	2286.91	1.90116	0.259321	7.33131	2.27906e-13	3.14715e-12	chr15	74619700	74624895	-	NA
ENSMUSG00000045327.8	114.292	-1.11099	0.151598	-7.32852	2.32701e-13	3.21163e-12	chr3	96513974	96537136	-	NA
ENSMUSG00000112280.2	181.283	-1.23876	0.169155	-7.32324	2.4205e-13	3.33885e-12	chr10	33863211	33871051	-	NA
ENSMUSG00000106015.2	17.2619	3.38251	0.461995	7.32153	2.45151e-13	3.3798e-12	chr5	127655813	127657173	+	NA
ENSMUSG00000051166.11	1096.24	0.787406	0.107565	7.32029	2.47444e-13	3.40957e-12	chr12	98753063	98867743	-	NA
ENSMUSG00000026452.16	39.7312	1.94691	0.266013	7.31887	2.50066e-13	3.44384e-12	chr1	134574414	134690331	+	NA
ENSMUSG00000042992.16	417.012	-0.865787	0.118332	-7.31661	2.54318e-13	3.5005e-12	chr6	134616472	134688150	+	NA
ENSMUSG00000118018.2	90.2285	-1.35153	0.184853	-7.31138	2.6441e-13	3.63745e-12	chr18	43659241	43662945	-	NA
ENSMUSG00000003573.16	1306.26	-0.648161	0.0887227	-7.30547	2.76292e-13	3.79887e-12	chr8	70735476	70747011	+	NA
ENSMUSG00000033287.18	4047.8	-0.698863	0.0957009	-7.30257	2.82319e-13	3.87965e-12	chr15	78312763	78323503	+	NA
ENSMUSG00000061032.10	13162.2	-0.544646	0.074592	-7.30166	2.84235e-13	3.90234e-12	chr10	78236217	78248877	-	NA
ENSMUSG00000020009.14	799.815	-0.60616	0.0830169	-7.30164	2.84276e-13	3.90234e-12	chr10	19467696	19485977	+	NA
ENSMUSG00000042743.14	883.812	0.674069	0.0923606	7.29823	2.91569e-13	4.0003e-12	chr13	104246248	104278243	+	NA
ENSMUSG00000085433.4	225.945	1.03458	0.141808	7.29563	2.97259e-13	4.0718e-12	chr5	124242611	124250327	-	NA
ENSMUSG00000049580.13	434.716	0.824668	0.113034	7.29576	2.9698e-13	4.0718e-12	chr7	97999874	98010535	-	NA
ENSMUSG00000027523.21	36864.9	-0.467359	0.0640594	-7.2957	2.97103e-13	4.0718e-12	chr2	174126112	174188537	+	NA
ENSMUSG00000074340.10	149.189	1.09674	0.150336	7.29527	2.98051e-13	4.08045e-12	chr3	105881026	105894739	+	NA
ENSMUSG00000020659.17	849.58	0.466074	0.0639013	7.29365	3.01665e-13	4.12772e-12	chr12	31534827	31549615	-	NA
ENSMUSG00000061589.15	6100.95	-0.458749	0.0629336	-7.2894	3.11338e-13	4.25779e-12	chr10	80591039	80631295	+	NA
ENSMUSG00000021994.16	1463.02	0.923429	0.126698	7.28841	3.13636e-13	4.28691e-12	chr14	28226706	28249405	+	NA
ENSMUSG00000027618.18	615.909	0.694691	0.0953186	7.2881	3.14365e-13	4.29458e-12	chr2	155965558	155986106	-	NA
ENSMUSG00000033400.15	2540	-0.658724	0.0904226	-7.28495	3.21793e-13	4.39371e-12	chr3	116533647	116601815	-	NA
ENSMUSG00000110386.2	21.6151	-6.3136	0.866725	-7.28443	3.23029e-13	4.40823e-12	chr8	85852500	85858918	-	NA
ENSMUSG00000026094.15	1475.08	-0.895734	0.12298	-7.2836	3.25033e-13	4.43321e-12	chr1	53794664	53824383	-	NA
ENSMUSG00000121309.1	53.3392	1.79443	0.246417	7.28211	3.2863e-13	4.47987e-12	chr12	17983164	17989629	+	NA
ENSMUSG00000063804.9	30.1831	-3.01859	0.414555	-7.28151	3.30114e-13	4.49769e-12	chr10	45252715	45362491	-	NA
ENSMUSG00000025216.10	370.368	-1.00739	0.138393	-7.27923	3.3572e-13	4.57163e-12	chr19	45221122	45224251	-	NA
ENSMUSG00000022948.17	113.294	-1.28879	0.177089	-7.27764	3.39699e-13	4.62335e-12	chr16	93380344	93400951	-	NA
ENSMUSG00000096696.2	44.913	1.57621	0.216656	7.27518	3.45964e-13	4.7061e-12	chr17	17284374	17309890	+	NA
ENSMUSG00000060969.10	1059.35	-1.2965	0.17825	-7.27348	3.50335e-13	4.76302e-12	chr13	72106039	72111842	-	NA
ENSMUSG00000043923.9	516.282	0.729043	0.100278	7.27022	3.58893e-13	4.87677e-12	chr9	44321455	44329866	-	NA
ENSMUSG00000042742.8	1514.35	-0.669338	0.0921057	-7.26706	3.67387e-13	4.98954e-12	chr6	13625671	13677965	-	NA
ENSMUSG00000036120.11	665.713	-0.686277	0.0944904	-7.26293	3.78789e-13	5.14166e-12	chr8	70583443	70591804	-	NA
ENSMUSG00000041741.11	1580.18	-0.903489	0.12444	-7.26042	3.85898e-13	5.23537e-12	chr6	141194994	141453174	+	NA
ENSMUSG00000024483.20	2877.03	0.490973	0.0676262	7.2601	3.8679e-13	5.24469e-12	chr18	36693039	36791966	+	NA
ENSMUSG00000079038.4	189.091	1.11047	0.152992	7.25836	3.91814e-13	5.30998e-12	chr8	69723731	69766859	+	NA
ENSMUSG00000025576.18	182.381	2.16501	0.298492	7.25315	4.07174e-13	5.51522e-12	chr11	118380587	118802423	-	NA
ENSMUSG00000032855.7	5156.43	0.676138	0.093259	7.2501	4.1645e-13	5.63787e-12	chr17	24768807	24815482	+	NA
ENSMUSG00000052681.9	5334.34	-0.770911	0.106334	-7.24992	4.17024e-13	5.64264e-12	chr10	117649775	117681940	-	NA
ENSMUSG00000043501.6	32.109	-2.20465	0.304174	-7.24798	4.23031e-13	5.72089e-12	chr15	78735059	78739729	-	NA
ENSMUSG00000024261.7	22.881	-3.2071	0.442914	-7.2409	4.4571e-13	6.0244e-12	chr18	31570860	31580459	-	NA
ENSMUSG00000121275.1	50.3176	1.62599	0.224576	7.24027	4.47791e-13	6.04933e-12	chr1	167135095	167136162	-	NA
ENSMUSG00000025938.17	178.812	-1.2897	0.17815	-7.23942	4.50623e-13	6.08115e-12	chr1	12936772	13062874	-	NA
ENSMUSG00000086695.2	17.0955	-5.20768	0.719347	-7.23946	4.50476e-13	6.08115e-12	chrX	168768796	168769935	-	NA
ENSMUSG00000005410.7	9456.56	-1.43933	0.198826	-7.23914	4.51544e-13	6.09035e-12	chr8	75836196	75855067	+	NA
ENSMUSG00000032508.9	74.9214	-1.36438	0.188502	-7.23804	4.55228e-13	6.1368e-12	chr9	119164999	119170477	-	NA
ENSMUSG00000026797.17	3253.42	0.892809	0.123384	7.23602	4.6206e-13	6.22561e-12	chr2	32677613	32737257	-	NA
ENSMUSG00000031584.17	2824.29	-1.13276	0.156623	-7.23236	4.74682e-13	6.3923e-12	chr8	34142550	34188191	+	NA
ENSMUSG00000017756.10	32.816	-7.4699	1.03299	-7.23136	4.78181e-13	6.43603e-12	chr13	73881212	73964873	+	NA
ENSMUSG00000033902.13	1037.61	0.586462	0.081109	7.23054	4.81084e-13	6.47168e-12	chr2	119803179	119857889	+	NA
ENSMUSG00000079491.11	17.2138	-3.01477	0.416965	-7.23029	4.81972e-13	6.48021e-12	chr17	36426767	36432357	-	NA
ENSMUSG00000032014.7	128.309	-1.96817	0.272241	-7.22951	4.84739e-13	6.51398e-12	chr9	43132531	43151208	-	NA
ENSMUSG00000030720.17	234.578	1.47665	0.20432	7.22715	4.9323e-13	6.6246e-12	chr7	126170378	126184989	-	NA
ENSMUSG00000053310.12	15.4557	-4.34213	0.600881	-7.22627	4.96441e-13	6.66422e-12	chr9	37455787	37464200	-	NA
ENSMUSG00000044303.7	3320.94	-1.29411	0.179106	-7.22535	4.99817e-13	6.70602e-12	chr4	89192707	89212890	-	NA
ENSMUSG00000074479.4	88.945	-1.18819	0.164454	-7.2251	5.00747e-13	6.71496e-12	chr3	88483716	88484446	-	NA
ENSMUSG00000029632.8	6605.36	-0.816578	0.113032	-7.22432	5.03622e-13	6.74642e-12	chr6	11900290	11907496	-	NA
ENSMUSG00000048402.15	704.99	-1.40973	0.195136	-7.22433	5.03571e-13	6.74642e-12	chr1	118761861	118981349	-	NA
ENSMUSG00000110185.3	394.03	0.865706	0.119834	7.22422	5.04001e-13	6.74795e-12	chr18	36431731	36434570	+	NA
ENSMUSG00000026803.18	810.08	0.537975	0.0745383	7.21742	5.29812e-13	7.08982e-12	chr2	28950273	28977668	+	NA
ENSMUSG00000062328.9	13167.8	0.583161	0.0808219	7.21539	5.37808e-13	7.19304e-12	chr18	75131628	75136452	+	NA
ENSMUSG00000031938.16	1864.48	0.546823	0.0757918	7.21481	5.40091e-13	7.21979e-12	chr9	15194632	15217744	-	NA
ENSMUSG00000001415.11	3539.71	-0.552071	0.076521	-7.21463	5.40804e-13	7.22554e-12	chr3	88243566	88269645	+	NA
ENSMUSG00000087263.2	17.1183	-4.18124	0.579711	-7.21263	5.48799e-13	7.32852e-12	chrX	168762042	168768228	-	NA
ENSMUSG00000024497.5	16.228	-6.99982	0.97061	-7.21177	5.52287e-13	7.37124e-12	chr18	42527603	42530314	+	NA
ENSMUSG00000054708.18	186.056	-0.994104	0.137851	-7.21142	5.53697e-13	7.38619e-12	chr10	81464373	81483444	+	NA
ENSMUSG00000015749.13	14747.7	-0.620991	0.0861349	-7.20952	5.61512e-13	7.48653e-12	chr3	95836557	95854702	+	NA
ENSMUSG00000035754.9	2201.82	-0.616458	0.0855806	-7.20325	5.87923e-13	7.83458e-12	chr10	79795985	79806037	+	NA
ENSMUSG00000021003.11	1317.3	0.693976	0.0963614	7.2018	5.94237e-13	7.91458e-12	chr12	98168552	98225718	-	NA
ENSMUSG00000060961.17	2674.67	-1.34482	0.186762	-7.20072	5.98949e-13	7.97318e-12	chr5	89034344	89387512	+	NA
ENSMUSG00000022758.15	37.3411	2.39915	0.333292	7.19835	6.09449e-13	8.10872e-12	chr16	17379748	17395664	+	NA
ENSMUSG00000033214.11	1040.35	-0.884761	0.122917	-7.19805	6.10808e-13	8.12257e-12	chr14	111912528	111920573	+	NA
ENSMUSG00000021725.10	577.738	-1.21395	0.168685	-7.19657	6.17478e-13	8.20699e-12	chr13	116991355	117162073	-	NA
ENSMUSG00000047143.4	1071.34	-0.953751	0.132535	-7.19623	6.1901e-13	8.22307e-12	chr4	109835249	109840884	+	NA
ENSMUSG00000032446.15	20.3481	-6.22577	0.865473	-7.19349	6.31536e-13	8.38511e-12	chr9	118307279	118315200	+	NA
ENSMUSG00000043850.16	49.1506	-2.3696	0.329477	-7.19202	6.384e-13	8.47183e-12	chr3	58751448	58792761	-	NA
ENSMUSG00000033430.11	1527.72	-0.569678	0.0792136	-7.19167	6.40028e-13	8.48902e-12	chr8	112738029	112747160	+	NA
ENSMUSG00000033416.16	810.897	-0.564646	0.0786126	-7.18264	6.8379e-13	9.06474e-12	chr10	75186944	75353806	-	NA
ENSMUSG00000063172.14	513.147	0.675413	0.0940504	7.1814	6.90018e-13	9.14257e-12	chr4	107110789	107137135	+	NA
ENSMUSG00000078866.11	272.037	0.976052	0.135981	7.17784	7.08199e-13	9.37859e-12	chr2	177156525	177169922	+	NA
ENSMUSG00000070056.7	2888.61	-1.23776	0.172642	-7.16954	7.52511e-13	9.96023e-12	chr8	36054951	36146603	+	NA
ENSMUSG00000064030.16	1303.29	-0.705063	0.098367	-7.16767	7.62828e-13	1.00915e-11	chr10	128583757	128602433	+	NA
ENSMUSG00000041695.3	121.305	1.12042	0.156382	7.16467	7.79746e-13	1.031e-11	chr11	110956989	110967647	+	NA
ENSMUSG00000053965.11	131.76	-1.17048	0.163468	-7.16032	8.04887e-13	1.06369e-11	chr3	122522595	122653023	+	NA
ENSMUSG00000068015.9	307.311	-0.969366	0.135399	-7.15931	8.10846e-13	1.07101e-11	chr14	74992114	75185316	-	NA
ENSMUSG00000001755.13	1923.61	0.612005	0.0854953	7.15835	8.1651e-13	1.07794e-11	chr11	100973390	100977445	+	NA
ENSMUSG00000039497.9	317.509	-0.73746	0.103069	-7.15504	8.36463e-13	1.10371e-11	chr10	34027388	34083711	-	NA
ENSMUSG00000024350.7	1865.79	0.849359	0.118715	7.15463	8.39006e-13	1.10649e-11	chr18	35804155	35841467	-	NA
ENSMUSG00000096433.3	150.27	1.03731	0.144986	7.15452	8.39688e-13	1.10682e-11	chr17	22416245	22444597	-	NA
ENSMUSG00000048707.10	686.426	1.62023	0.226492	7.15357	8.45467e-13	1.11386e-11	chr2	25152629	25159897	+	NA
ENSMUSG00000042401.9	86.6095	-2.61817	0.366026	-7.15298	8.49141e-13	1.11812e-11	chr19	42256725	42420224	-	NA
ENSMUSG00000025813.15	455.506	1.51093	0.211309	7.15032	8.65734e-13	1.13938e-11	chr7	81250228	81357275	-	NA
ENSMUSG00000057147.14	589.093	-0.99136	0.138706	-7.14722	8.85515e-13	1.16482e-11	chr2	114346896	114485445	-	NA
ENSMUSG00000032127.10	2870.48	0.586761	0.0821183	7.14531	8.97919e-13	1.18053e-11	chr9	44259045	44272967	-	NA
ENSMUSG00000026388.16	163.897	-0.904808	0.126636	-7.14497	9.00125e-13	1.18282e-11	chr1	120048916	120115919	+	NA
ENSMUSG00000000861.16	406.371	-1.07546	0.150548	-7.1436	9.09199e-13	1.19413e-11	chr11	24028055	24124123	+	NA
ENSMUSG00000038160.8	1003.33	-0.721441	0.100994	-7.14343	9.10291e-13	1.19494e-11	chr10	44144353	44240287	+	NA
ENSMUSG00000051223.15	10053.8	-0.694101	0.0971722	-7.14299	9.13196e-13	1.19814e-11	chr1	58432056	58446512	+	NA
ENSMUSG00000057716.8	69.9166	-1.91427	0.268028	-7.14207	9.19381e-13	1.20564e-11	chr6	39848394	40232084	+	NA
ENSMUSG00000040506.17	2812.79	0.505081	0.0707216	7.14182	9.21042e-13	1.20719e-11	chr2	91560478	91749194	+	NA
ENSMUSG00000036054.16	2864.81	-0.568818	0.0796518	-7.14131	9.24461e-13	1.21043e-11	chr8	70686875	70732565	+	NA
ENSMUSG00000027715.10	5293.29	-0.946381	0.132521	-7.14137	9.24053e-13	1.21043e-11	chr3	36619013	36626299	-	NA
ENSMUSG00000033453.9	20.3651	-6.21068	0.869756	-7.14071	9.28474e-13	1.21506e-11	chr9	30810450	30833748	-	NA
ENSMUSG00000037355.15	1292.11	0.869595	0.121821	7.13829	9.45009e-13	1.23607e-11	chr5	33535892	33577098	+	NA
ENSMUSG00000029676.16	1050.27	-0.615807	0.0862705	-7.13809	9.46345e-13	1.23718e-11	chr6	25743735	25809245	-	NA
ENSMUSG00000031728.11	1327.59	-0.51387	0.072016	-7.13549	9.64427e-13	1.26017e-11	chr8	110432177	110451564	+	NA
ENSMUSG00000013275.10	2587.48	0.66239	0.0928326	7.13531	9.65669e-13	1.26115e-11	chr1	131755230	131776603	+	NA
ENSMUSG00000044017.17	133.123	4.59792	0.644494	7.13415	9.73861e-13	1.2712e-11	chr5	129173813	129281663	+	NA
ENSMUSG00000046818.8	195.455	-7.44714	1.04397	-7.13348	9.78614e-13	1.27675e-11	chr3	137327372	137334094	+	NA
ENSMUSG00000031166.14	2850.36	0.759334	0.106482	7.13111	9.95632e-13	1.29829e-11	chrX	7989539	7999131	-	NA
ENSMUSG00000026594.15	1852.51	0.968618	0.13586	7.12951	1.00729e-12	1.31282e-11	chr1	156631735	156767196	-	NA
ENSMUSG00000048834.17	17.1475	-7.09506	0.995208	-7.12922	1.0094e-12	1.3149e-11	chr11	16207723	16377310	+	NA
ENSMUSG00000023089.13	2422.01	-0.669703	0.0939479	-7.12845	1.01507e-12	1.32161e-11	chr6	24518664	24528012	-	NA
ENSMUSG00000018425.19	3520.38	0.918666	0.128888	7.12764	1.02105e-12	1.32871e-11	chr11	86659671	86698572	-	NA
ENSMUSG00000116165.2	651.15	-0.619358	0.0868992	-7.12732	1.02344e-12	1.33115e-11	chr15	78798118	78803717	+	NA
ENSMUSG00000110404.2	156.283	1.14144	0.160162	7.1268	1.02731e-12	1.33482e-11	chr4	156214969	156217877	+	NA
ENSMUSG00000024232.3	165.82	-1.16694	0.163739	-7.12685	1.02692e-12	1.33482e-11	chr18	3507922	3516404	+	NA
ENSMUSG00000022112.15	17.6937	-4.40086	0.617671	-7.12492	1.04144e-12	1.35249e-11	chr14	115329646	116762591	+	NA
ENSMUSG00000022537.19	2759.39	0.362943	0.0509419	7.12465	1.04347e-12	1.35444e-11	chr16	30330672	30369660	-	NA
ENSMUSG00000036499.10	2186.07	-0.860644	0.120856	-7.12124	1.06962e-12	1.38768e-11	chr10	95776511	95881380	+	NA
ENSMUSG00000082195.4	67.0061	-1.24498	0.174891	-7.11863	1.09008e-12	1.4135e-11	chr4	146004321	146007498	+	NA
ENSMUSG00000019864.15	699.064	-1.00262	0.140847	-7.11854	1.09073e-12	1.41363e-11	chr10	43777802	43833197	+	NA
ENSMUSG00000036109.18	10.5041	-6.99531	0.982717	-7.11834	1.09233e-12	1.41499e-11	chrX	50206145	50295409	-	NA
ENSMUSG00000031453.17	13475	-0.582365	0.0818219	-7.11746	1.09931e-12	1.4233e-11	chr8	13616947	13727603	-	NA
ENSMUSG00000080797.3	147.015	1.11735	0.156994	7.11716	1.10175e-12	1.42574e-11	chr16	20363961	20367206	-	NA
ENSMUSG00000042632.18	1645.89	-0.841697	0.118313	-7.11418	1.12579e-12	1.45611e-11	chr15	79170427	79212590	-	NA
ENSMUSG00000068099.6	451.232	-1.13068	0.158944	-7.11368	1.12989e-12	1.46068e-11	chr15	82136597	82144954	+	NA
ENSMUSG00000114936.2	9.92266	-6.90327	0.970615	-7.11227	1.1415e-12	1.47493e-11	chr13	40876585	40878925	+	NA
ENSMUSG00000022180.8	18.6511	-3.15968	0.44455	-7.1076	1.18081e-12	1.52496e-11	chr14	54959665	55019403	-	NA
ENSMUSG00000015879.9	48.6148	-2.13327	0.300151	-7.10733	1.18307e-12	1.52709e-11	chr5	45687046	45796956	-	NA
ENSMUSG00000052456.10	5478.82	-0.815014	0.114689	-7.10631	1.19184e-12	1.53765e-11	chr8	85744559	85751910	-	NA
ENSMUSG00000003923.15	2232.54	-0.603137	0.084875	-7.10618	1.19299e-12	1.53835e-11	chr10	71061293	71074110	-	NA
ENSMUSG00000038295.15	19.4237	-2.61877	0.368814	-7.10052	1.24285e-12	1.60183e-11	chr5	24589178	24597141	-	NA
ENSMUSG00000031822.21	2463.83	-0.776751	0.109416	-7.09904	1.25623e-12	1.61826e-11	chr8	120955194	121308129	+	NA
ENSMUSG00000074482.6	184.389	1.01185	0.142543	7.09855	1.26073e-12	1.62323e-11	chr8	4137657	4138575	+	NA
ENSMUSG00000034777.3	199.801	-1.63777	0.230761	-7.09727	1.27245e-12	1.6375e-11	chr6	83688245	83715295	+	NA
ENSMUSG00000031533.5	1318.49	-0.813883	0.114725	-7.09418	1.30119e-12	1.67364e-11	chr8	22901376	22919681	+	NA
ENSMUSG00000036437.7	12.6371	-7.21077	1.0175	-7.08672	1.37329e-12	1.76549e-11	chr8	67149843	67159444	+	NA
ENSMUSG00000033763.15	34661.9	-1.00238	0.141462	-7.08586	1.3818e-12	1.77554e-11	chr8	111448107	111468032	+	NA
ENSMUSG00000040511.15	1202.23	1.08987	0.153816	7.08555	1.38493e-12	1.77866e-11	chr7	19637502	19655085	-	NA
ENSMUSG00000031601.17	2670.63	-0.505526	0.0713502	-7.08514	1.38908e-12	1.7831e-11	chr8	40945580	40968888	-	NA
ENSMUSG00000020196.11	5015.19	-0.43418	0.0613306	-7.07933	1.44853e-12	1.85766e-11	chr10	75481945	75600175	-	NA
ENSMUSG00000043943.15	65.647	-2.56805	0.362753	-7.07932	1.44862e-12	1.85766e-11	chr9	18233246	18314291	-	NA
ENSMUSG00000001473.8	4370.85	0.837082	0.11829	7.07651	1.47831e-12	1.89478e-11	chr18	67523786	67535819	+	NA
ENSMUSG00000027775.10	4664.58	0.726172	0.102629	7.07568	1.48716e-12	1.90517e-11	chr3	67490073	67511570	+	NA
ENSMUSG00000021213.13	91.3952	-1.78529	0.252317	-7.07559	1.48813e-12	1.90544e-11	chr13	4241148	4255595	+	NA
ENSMUSG00000068859.6	562.388	1.06919	0.151128	7.07474	1.49729e-12	1.91622e-11	chr2	73102268	73115050	+	NA
ENSMUSG00000001985.10	9.96259	-6.88586	0.973759	-7.07142	1.53353e-12	1.96161e-11	chr4	125384492	125607966	+	NA
ENSMUSG00000041685.17	2067.37	0.477517	0.0675728	7.0667	1.58656e-12	2.02843e-11	chr13	98859910	98951957	-	NA
ENSMUSG00000026547.16	28.5399	-3.1329	0.443445	-7.06492	1.60711e-12	2.05367e-11	chr1	172327613	172334947	+	NA
ENSMUSG00000104950.2	117.792	1.18897	0.168339	7.06293	1.63027e-12	2.08127e-11	chr5	3679776	3681722	-	NA
ENSMUSG00000079277.10	9.7639	-6.86472	0.971937	-7.06293	1.63034e-12	2.08127e-11	chr2	74542270	74578786	+	NA
[truncated: 54,884 more rows]
[truncated: 6 more columns]

## Sheet: DAVID Analysis up-reg genes
Category	Term	Count	%	PValue	Genes	List Total	Pop Hits	Pop Total	Fold Enrichment	Bonferroni	Benjamini	FDR		minusLOG10(p-value)
UP_KW_BIOLOGICAL_PROCESS	KW-0130~Cell adhesion	58	4.17266	6.01172e-13	PCDHGB8, SPON1, PCDHGB6, MEGF10, ITGB4, COL14A1, PCDHGB2, LAMC2, CX3CL1, MMP24, HYAL3, PGM5, PCDHGA7, ITGA3, EPHA8, PCDHGA2, PCDHGA1, APLP1, F5, BCAM, NINJ2, TYRO3, CERCAM, ITGA7, CDH15, EPHA1, FREM1, DSC1, CD44, LAMA2, THBS2, NID2, LY9, PCDHB20, VTN, ABL2, IGFBP7, PCDHA9, COL28A1, CADM1, CNTN5, MCAM, PCDHB15, PCDHB13, L1CAM, S100B, SELE, MFAP4, PCDHGA12, FAP, PCDHB18, COL7A1, PCDHB17, PCDHB16, F…	471	490	11473	2.88329	7.03387e-11	7.03371e-11	6.85336e-11		12.221
UP_KW_BIOLOGICAL_PROCESS	KW-0399~Innate immunity	36	2.58993	1.26131e-05	IFITM2, PELI3, ENDOD1, PLD4, NOD2, PRDM1, LY9, PLD3, IFIH1, C3, C4B, CD1D2, GPER1, NLRP3, GBP2, GBP4, OASL1, HAVCR2, GBP3, GBP6, ARG2, GBP9, MX2, CARD9, MPEG1, PML, FCGR1, GBP10, AXL, SERPING1, MASP1, ALPK1, SERINC3, SERINC5, OPTN, TLR2	471	393	11473	2.23134	0.00147466	0.000737868	0.000718948		4.89918
UP_KW_BIOLOGICAL_PROCESS	KW-0221~Differentiation	53	3.81295	0.000400986	PIWIL2, CPNE9, EDA, TENM4, WIPF3, SHB, EDA2R, PEG10, GPER1, INSC, SPATA24, DNMT3C, CCIN, AMH, CFAP43, FAM209, PRKCH, PAQR5, SOX13, DLEC1, OBSCN, SFRP5, DCX, TESMIN, CFAP53, NOTCH3, TWIST1, RASAL1, ASCL2, DLL4, NEUROD1, NEUROD2, RHOX5, NHLH1, CFAP69, GPR157, NTRK2, SRPK3, SYT2, SEMA4D, CADM1, SRD5A1, SEMA4B, MEIG1, RARRES2, TDRD6, L1CAM, CDK6, AXL, SMOC1, MGP, MYCBPAP, REC114	471	788	11473	1.63835	0.0458409	0.0134819	0.0131362		3.39687
UP_KW_BIOLOGICAL_PROCESS	KW-0406~Ion transport	44	3.16547	0.000460919	RYR1, GABRB1, KCNG4, STEAP4, TTYH2, CHRNA4, SLC23A1, CHRNA7, ATP1A4, ATP1A3, NALCN, GABRR2, ASIC4, KCNT1, KCNN2, SLC26A11, CACNA1S, SLC39A2, TRPM5, KCNJ2, TMC1, KCNH2, CHRNB1, KCNH4, SLC38A1, SLC13A4, KCND1, KCNJ12, KCNH7, CACNA2D1, SLC12A1, SLC39A11, SLC4A11, HTR3A, KCNAB1, KCNAB2, CACNA2D4, TMC4, P2RX6, CACNB2, SLC9A3, CLDN15, KCNQ2, SLCO2A1	471	619	11473	1.73148	0.052511	0.0134819	0.0131362		3.33638
UP_KW_BIOLOGICAL_PROCESS	KW-0633~Potassium transport	14	1.00719	0.00156333	KCNH2, KCNH4, KCNG4, KCND1, KCNJ12, KCNH7, SLC12A1, ATP1A4, ATP1A3, KCNAB1, KCNAB2, KCNT1, KCNQ2, KCNJ2	471	123	11473	2.77255	0.167275	0.0365818	0.0356438		2.80595
UP_KW_BIOLOGICAL_PROCESS	KW-1009~Hearing	8	0.57554	0.00317724	TMC1, UCN, OTOA, ESPNL, USH1G, HOMER2, MYO7A, TPRN	471	48	11473	4.0598	0.310872	0.0619561	0.0603675		2.49795
UP_KW_BIOLOGICAL_PROCESS	KW-0813~Transport	105	7.55396	0.0092528	ATP8A2, KCNG4, STEAP4, SLC23A1, AQP4, AQP1, FADS3, RIMS4, ZFP36, RINL, PEG10, SLC16A8, SLC26A11, AP1S3, PTGDS, SLC39A2, MFSD2B, SLC16A3, KCNH2, CHRNB1, KCNH4, SLC38A1, KCNH7, CACNA2D1, SPNS2, MYO7A, CACNA2D4, CACNB2, SLC9A3, ARC, KCNQ2, SLCO2A1, TTYH2, CHRNA4, CHRNA7, SLC1A5, NALCN, ASIC4, NPC1L1, KCNN2, CACNA1S, APOE, TRPM5, PLTP, SEC31B, ABCA1, SEC16B, ABCA2, TCAF2, ATP8B5, SLC14A2, OSBPL5, ABC…	471	2048	11473	1.24886	0.662981	0.154654	0.150688		2.03373
UP_KW_BIOLOGICAL_PROCESS	KW-0443~Lipid metabolism	41	2.94964	0.0294263	FAAH, PTPRQ, HEXA, PLD4, PTPN22, SDSL, CYP46A1, PLD3, C3, FADS3, HSD11B1, NEU3, HPGDS, AKR1C21, CYP26B1, GM2A, NPC1L1, ALDH3B1, CYP1B1, AOX1, PTGDS, SDS, SRD5A1, B3GALT4, ACOT12, B3GALT5, FAH, BAAT, RPE65, NPC1, B3GNT5, GSTA1, ACER3, ALDH1A1, RDH5, ANGPTL4, PLCD4, SERINC5, MGLL, GPLD1, PLCD1	471	719	11473	1.38903	0.969637	0.430359	0.419324		1.53126
UP_KW_BIOLOGICAL_PROCESS	KW-0844~Vision	8	0.57554	0.0452016	DLL4, BFSP2, RGS9BP, GUCA1B, RDH5, NYX, ARR3, RPE65	471	80	11473	2.43588	0.995537	0.584744	0.569751		1.34485
UP_KW_BIOLOGICAL_PROCESS	KW-0051~Antiviral defense	9	0.647482	0.0550161	IFIH1, RNASEL, IFITM2, MX2, ISG15, SERINC3, OASL1, PML, SERINC5	471	101	11473	2.17059	0.998668	0.584744	0.569751		1.25951
UP_KW_BIOLOGICAL_PROCESS	KW-0469~Meiosis	10	0.719424	0.0577771	PIWIL2, EXD1, CNTD1, STAG3, PRR19, MCMDC2, MEIG1, TESMIN, 1700028K03RIK, REC114	471	120	11473	2.0299	0.999054	0.584744	0.569751		1.23824
UP_KW_BIOLOGICAL_PROCESS	KW-0445~Lipid transport	12	0.863309	0.0599738	GRAMD1B, ATP8B5, ATP8A2, NPC1, OSBPL5, SLCO2A1, SPNS2, ESYT3, ANO7, APOE, MFSD2B, PLTP	471	158	11473	1.85004	0.99928	0.584744	0.569751		1.22204
UP_KW_BIOLOGICAL_PROCESS	KW-0524~Neurogenesis	18	1.29496	0.0685122	CHODL, EPHA5, NTRK2, SEMA4D, EPHA8, SEMA4B, FOXN4, L1CAM, ASCL2, DLL4, NEUROD1, RNF112, NEUROD2, GPER1, TRNP1, INSC, DCX, PLXNB3	471	280	11473	1.56592	0.999752	0.61661	0.600799		1.16423
DAVID Functional annotations: up-regulated genes FOXO cKO vs WT aNSPCs; adj.p<0.01, log2 fold change >1

## Sheet: DAVID Analysis down-reg genes
Category	Term	Count	%	PValue	Genes	List Total	Pop Hits	Pop Total	Fold Enrichment	Bonferroni	Benjamini	FDR		minusLOG10(p-value)
UP_KW_BIOLOGICAL_PROCESS	KW-0524~Neurogenesis	37	2.21823	2.8957e-05	SEMA5A, VIT, SEMA5B, HMX3, BEX1, SEMA3D, SDC2, NTN5, OTP, SEMA3E, BHLHE22, EFNA5, ASCL1, NDRG2, CHRDL1, IGSF9, EFNB2, BRINP1, DCDC2A, CHL1, ZIC3, ZIC1, SLIT2, N4BP3, ATOH1, NTNG1, DYNLT1B, PAX3, PAX5, LBX1, CAMK1, RTN4IP1, FGF13, TOX, NEUROG1, HMX2, NGEF	719	280	11473	2.10859	0.00375739	0.00201199	0.00190365		4.53825
UP_KW_BIOLOGICAL_PROCESS	KW-0130~Cell adhesion	55	3.29736	3.09537e-05	RIPOR2, TENM2, TENM3, PCDHGB5, TNFAIP6, CLSTN2, NCAN, CTNND2, CDH6, CDH4, CHL1, SVEP1, PCDHAC1, PCDHGA8, KIRREL3, POSTN, PCDHGA6, PCDHA12, CDHR1, CDH10, CDH11, COL6A4, CDH12, PKP2, COL6A3, ITGA5, FBLN7, LAMA1, FBLIM1, LAMA4, AMIGO2, THBS1, COL19A1, FBLN5, PCDH17, ARVCF, SRPX2, RELN, PCDHA1, ADAM23, CDH23, PCDHA3, PCDHA2, CTNNA2, CGREF1, CADM3, PCDH20, PARVB, NFASC, PARVG, PCDHB1, CNTN1, ACKR3, CN…	719	490	11473	1.79108	0.00401596	0.00201199	0.00190365		4.50929
UP_KW_BIOLOGICAL_PROCESS	KW-0221~Differentiation	77	4.61631	8.429e-05	SEMA5A, SEMA5B, HMX3, RIPOR2, TENM3, FLT1, TNFAIP2, OTP, FGF2, CHRDL1, CLGN, FCRLA, RIMS2, LRMDA, RIMS1, CHL1, ZIC3, ZIC1, EDARADD, ADGB, EOMES, PRMT7, UNC13A, FOXL2, PAX5, ISL1, MLF1, CCNA1, SFRP4, DISP3, SFRP1, SFRP2, HAND2, VDAC3, TSSK6, VSTM2A, HMX2, NGEF, OSBP2, RAI14, BEX1, DDX4, SEMA3D, SDC2, SEMA3E, FOXO4, ASCL1, EFNA5, NDRG2, FOXO1, IGSF9, COL19A1, EFNB2, STK33, KLC3, SLIT2, CTNNA2, ATOH…	719	788	11473	1.55924	0.0108983	0.00365257	0.00345589		4.07422
UP_KW_BIOLOGICAL_PROCESS	KW-0406~Ion transport	63	3.77698	0.0001394	RYR2, KCNC4, MCUB, SLC40A1, GRIK3, GRIK1, SLC4A4, ATP7B, PIEZO1, SLC12A7, SCN1A, TRPC5, TRPC3, KCNK10, SLC6A17, KCND2, TRPC4, KCNH8, KCNK13, CACNA2D3, SLC9A2, VDAC3, KCNQ4, SLC22A21, CFTR, GRIA1, SLC41A3, CACNA1B, CACNA1A, CACNA1D, SLCO5A1, SLC5A1, SLC30A10, CACNA1E, CACNA1G, SLC5A5, CACNG6, CACNA1I, CACNG8, CHRNG, KCNMB4, KCNN1, CACNG1, KCNN3, GRIA3, GRIA4, KCNF1, SLC10A7, KCNIP1, KCNIP2, KCNB2,…	719	619	11473	1.62404	0.01796	0.0045305	0.00428655		3.85574
UP_KW_BIOLOGICAL_PROCESS	KW-0813~Transport	165	9.89209	0.000270613	RAB3B, TUSC3, AQP5, ABCA13, SLC4A4, RIMS2, RIMS1, RIMS3, PIEZO1, VPS36, SLC12A7, MFSD2A, SCN1A, CADPS2, KCNK10, SLC6A17, KCNH8, KCNK12, ATG9B, KCNK13, CACNA2D3, TAP2, TAP1, MFSD10, NUP93, SLC9A2, RAB36, KIF16B, MIP, VDAC3, SLC27A6, KCNQ4, RAB38, KDELR3, RAB39, ABCG4, CFTR, OSBP2, ABCG2, GRIA1, ENY2, ABCB6, UQCRB, SLC41A3, CACNA1B, CACNA1A, CACNA1D, SLCO5A1, LIN7A, SLC5A1, SLC1A6, SLC30A10, CACNA1…	719	2048	11473	1.28559	0.0345726	0.00650005	0.00615004		3.56765
UP_KW_BIOLOGICAL_PROCESS	KW-0268~Exocytosis	14	0.839329	0.000300002	CADPS2, UNC13A, LGI3, CADPS, RAB27A, LIN7A, NKD2, SYTL2, STXBP5L, RIMS2, RIMS1, RIMS3, SNX19, SYT10	719	69	11473	3.23763	0.0382552	0.00650005	0.00615004		3.52288
UP_KW_BIOLOGICAL_PROCESS	KW-0805~Transcription regulation	167	10.012	0.000581298	FOXA1, ZFP961, CTNND2, HDAC11, WWC2, OTP, AHR, RBPJ, HOXA13, AI854703, NR3C2, FOXQ1, HOXA9, SALL1, SOX1, MYB, HOXA7, VPS36, HOXA6, MNX1, HOXA4, EOMES, TLE2, MEF2B, ZFP3, KCTD1, ARID5B, ZFP618, POU3F1, ISL1, TLE6, RUNX1, SAP30, AR, KAT6A, TIMELESS, ZFP7, TOX, ZFPM2, ASF1B, KHDRBS2, ENY2, KHDRBS3, DLX5, ZFP868, FOXG1, FOXO4, GATA3, BHLHE22, GTF2E2, FOXO1, NPAS2, HELZ2, NDN, ALX4, ALX1, NKX2-2, GSDM…	719	2110	11473	1.26294	0.0728043	0.0107955	0.0102142		3.2356
UP_KW_BIOLOGICAL_PROCESS	KW-0804~Transcription	168	10.0719	0.001435	FOXA1, ZFP961, CTNND2, HDAC11, WWC2, OTP, AHR, RBPJ, HOXA13, AI854703, NR3C2, FOXQ1, HOXA9, SALL1, SOX1, MYB, HOXA7, VPS36, HOXA6, MNX1, HOXA4, EOMES, TLE2, MEF2B, ZFP3, KCTD1, ARID5B, ZFP618, POU3F1, ISL1, TLE6, RUNX1, SAP30, AR, KAT6A, TIMELESS, ZFP7, TOX, ZFPM2, ASF1B, KHDRBS2, ENY2, KHDRBS3, DLX5, ZFP868, FOXG1, FOXO4, GATA3, BHLHE22, GTF2E2, FOXO1, NPAS2, HELZ2, NDN, ALX4, ALX1, NKX2-2, GSDM…	719	2166	11473	1.23765	0.170294	0.0227599	0.0215344		2.84315
UP_KW_BIOLOGICAL_PROCESS	KW-0443~Lipid metabolism	66	3.95683	0.00157568	DHRS11, DGKB, MSMO1, PREX2, CPT2, FADS6, CYP4V3, ENPP2, SCD1, ACADS, SREBF1, ARSA, CBR1, ELOVL2, ACSL5, PLAAT3, ELOVL6, CYP7B1, PTGR2, TLCD3B, ALDH1A3, DISP3, PLPP5, PLCB4, BDH1, ILVBL, EHHADH, SLC27A6, MVD, BCAT1, ACOT6, CDS1, ACSS3, PCX, ABHD3, GSTP1, LCAT, PLA2G3, LPL, GSTP-PS, GDPD3, PTGS2, AGPAT2, PLA2G7, OXCT1, GPAT4, PMVK, PLCG2, SPTSSB, BCO2, ACSS1, DECR1, JAZF1, FDPS, ST8SIA1, MBOAT1, SL…	719	719	11473	1.46475	0.185353	0.0227599	0.0215344		2.80253
UP_KW_BIOLOGICAL_PROCESS	KW-0109~Calcium transport	16	0.959233	0.00198524	RYR2, TRPC5, TRPC3, TRPC4, MCUB, CACNA2D3, CACNA1B, CACNA1A, CACNA1D, ATP2B2, CACNA1E, CACNA1G, CACNG6, CACNG8, CACNG1, MCU	719	104	11473	2.45491	0.227666	0.0258081	0.0244184		2.70219
UP_KW_BIOLOGICAL_PROCESS	KW-0037~Angiogenesis	18	1.07914	0.00558207	MINAR1, FLT1, MMP2, TNFAIP2, VEGFC, SEMA3E, THBS1, FGF2, PTK2, ARHGAP24, EFNA1, EFNB2, PTPRB, SRPX2, COL4A2, ADGRA2, HAND2, S1PR1	719	138	11473	2.08133	0.516982	0.0659699	0.0624176		2.25321
UP_KW_BIOLOGICAL_PROCESS	KW-0532~Neurotransmitter transport	8	0.479616	0.00722843	RIMS2, RIMS1, RIMS3, SLC6A9, SLC6A17, SLC32A1, SV2A, SLC18A3	719	37	11473	3.45014	0.610585	0.078308	0.0740914		2.14096
UP_KW_BIOLOGICAL_PROCESS	KW-0444~Lipid biosynthesis	20	1.19904	0.0111935	CDS1, FDPS, PCX, ST8SIA1, ELOVL2, MBOAT1, ELOVL6, MSMO1, CYP7B1, PTGS2, AGPAT2, TLCD3B, FADS6, GPAT4, PRXL2B, LPCAT2, PMVK, PNPLA3, MVD, SCD1	719	172	11473	1.85545	0.768541	0.111935	0.105907		1.95104
UP_KW_BIOLOGICAL_PROCESS	KW-0879~Wnt signaling pathway	21	1.25899	0.0154756	APC2, TLE2, WNT7B, FZD9, WNT7A, FZD10, NDRG2, VAX2, NKD2, SHISA6, WNT6, SFRP4, DAB2, SFRP1, SFRP2, ADGRA2, DAAM2, RSPO2, ROR1, ROR2, TRABD2B	719	190	11473	1.76366	0.868344	0.143702	0.135964		1.81035
UP_KW_BIOLOGICAL_PROCESS	KW-0633~Potassium transport	15	0.899281	0.0214138	KCNF1, KCNIP1, KCND2, KCNIP2, KCNH8, KCNB2, KCNK12, KCNK13, KCNC4, KCNQ4, FXYD6, KCNK1, KCNK2, SLC12A7, HCN1	719	123	11473	1.94596	0.940038	0.181797	0.172008		1.66931
UP_KW_BIOLOGICAL_PROCESS	KW-0029~Amino-acid transport	9	0.539568	0.0223751	SLC25A29, XK, SLC7A8, SLC6A9, SLC6A17, SLC7A14, SFXN4, SLC1A6, SLC7A2	719	56	11473	2.5645	0.947229	0.181797	0.172008		1.65024
UP_KW_BIOLOGICAL_PROCESS	KW-0445~Lipid transport	16	0.959233	0.0698012	ABCC4, ATP8B1, ATG9B, APOA2, ANO4, ABCA13, ANO3, GULP1, PLSCR1, FABP5, TSPO, SLC27A6, ATP9A, OSBP2, ABCG2, MFSD2A	719	158	11473	1.61589	0.999918	0.47125	0.445875		1.15614
UP_KW_BIOLOGICAL_PROCESS	KW-0517~Myogenesis	7	0.419664	0.0712409	RIPOR2, PAX7, PAX3, ID3, FOXO4, LBX1, COL19A1	719	47	11473	2.37656	0.999933	0.47125	0.445875		1.14727
UP_KW_BIOLOGICAL_PROCESS	KW-0395~Inflammatory response	19	1.13909	0.0763764	LYN, SETD4, GSDMD, LXN, IL1R1, TRIL, HMGB2, IL18, THBS1, IL17RC, IL17RA, MFHAS1, LACC1, MEP1B, CHST1, HC, CD14, TLR5, MYD88	719	200	11473	1.5159	0.999967	0.47125	0.445875		1.11704
UP_KW_BIOLOGICAL_PROCESS	KW-1009~Hearing	7	0.419664	0.0773299	RIPOR2, ATP8B1, SLITRK6, CDH23, KCNQ4, COCH, CLRN1	719	48	11473	2.32705	0.999971	0.47125	0.445875		1.11165
UP_KW_BIOLOGICAL_PROCESS	KW-0892~Osteogenesis	6	0.359712	0.0787484	DLX5, NPR2, OSTN, BMP7, CHRDL1, DDR2	719	37	11473	2.5876	0.999977	0.47125	0.445875		1.10376
UP_KW_BIOLOGICAL_PROCESS	KW-1208~Phospholipid metabolism	9	0.539568	0.0797501	CDS1, GPAT4, ABHD3, LPCAT2, MBOAT1, PNPLA3, PLA2G3, AGPAT2, PLA2G7	719	72	11473	1.99461	0.99998	0.47125	0.445875		1.09827
UP_KW_BIOLOGICAL_PROCESS	KW-0153~Cholesterol metabolism	8	0.479616	0.0852814	SREBF1, FDPS, DISP3, PMVK, LCAT, MSMO1, MVD, CYP7B1	719	61	11473	2.09271	0.999991	0.482025	0.45607		1.06915
DAVID Functional annotations: down-regulated genes FOXO cKO vs WT aNSPCs; adj.p<0.01, log2 fold change <-1
